# Supplementary material for: Incidence and Risk Factors of Alveolar Bone Dehiscences and Fenestrations after Clear Aligner Therapy with Class II Elastics: A Retrospective Study
Source: Research Square preprint supplement (doi:10.21203/rs.3.rs-5592559/v1), 2025-04-10
Supplement: Supplementary file 1 [file 55a82bbdf9a05a096fc1901c.xlsx]

## Sheet: first evaluation of obsever 1
Name	Tooth	Gender	Age	durationMonth	observer	Crowding-maxilla	Crowding-mandible	ANB	MPSN	U1SN	L1MP	labial/lingial	T0ABD	T1ABD	T0ABF	T1ABF	牙位	Tooth_A	jaw(1maxilla;2mandibular)	filter_$	T0ABD有无	T1ABD有无	T0ABF有无	T1ABF有无	T0ABF严重程度	T1ABF严重程度	TOABD严重程度	T1ABD严重程度
1	11	2	23	9	1	0	0	4.3	41	89.5	93	1	1.7	1.5	0	0	1	11	1	1	0	0	0	0	0	0	0	0
1	11	2	23	9	1	0	0	4.3	41	89.5	93	2	1.9	1.6	0	0	1	11	1	0	0	0	0	0	0	0	0	0
1	12	2	23	9	1	0	0	4.3	41	89.5	93	1	2	1	2.2	2	2	12	1	1	0	0	0	0	0	0	0	0
1	12	2	23	9	1	0	0	4.3	41	89.5	93	2	1.4	0.9	0	0	2	12	1	0	0	0	0	0	0	0	0	0
1	13	2	23	9	1	0	0	4.3	41	89.5	93	1	2	1.3	5.3	7.1	3	13	1	1	0	0	1	1	2	3	0	0
1	13	2	23	9	1	0	0	4.3	41	89.5	93	2	1.6	1.6	0	0	3	13	1	0	0	0	0	0	0	0	0	0
1	21	2	23	9	1	0	0	4.3	41	89.5	93	1	1.6	1.1	0	0	1	21	1	1	0	0	0	0	0	0	0	0
1	21	2	23	9	1	0	0	4.3	41	89.5	93	2	1.8	1.8	0	0	1	21	1	0	0	0	0	0	0	0	0	0
1	22	2	23	9	1	0	0	4.3	41	89.5	93	1	2	1.5	4.8	5.9	2	22	1	1	0	0	1	1	2	2	0	0
1	22	2	23	9	1	0	0	4.3	41	89.5	93	2	1.4	1.6	0	0	2	22	1	0	0	0	0	0	0	0	0	0
1	23	2	23	9	1	0	0	4.3	41	89.5	93	1	1.6	1.3	0	0	3	23	1	1	0	0	0	0	0	0	0	0
1	23	2	23	9	1	0	0	4.3	41	89.5	93	2	1.5	1.2	0	0	3	23	1	0	0	0	0	0	0	0	0	0
1	31	2	23	9	1	0	0	4.3	41	89.5	93	1	9.4	5.5	0	0	4	31	2	1	1	1	0	0	0	0	3	2
1	31	2	23	9	1	0	0	4.3	41	89.5	93	2	1.9	8.7	0	0	4	31	2	0	0	1	0	0	0	0	0	3
1	32	2	23	9	1	0	0	4.3	41	89.5	93	1	1.8	1.6	4.2	4.3	5	32	2	1	0	0	1	1	2	2	0	0
1	32	2	23	9	1	0	0	4.3	41	89.5	93	2	2	1.8	0	0	5	32	2	0	0	0	0	0	0	0	0	0
1	33	2	23	9	1	0	0	4.3	41	89.5	93	1	1.5	7.8	4.5	0	6	33	2	1	0	1	1	0	2	0	0	3
1	33	2	23	9	1	0	0	4.3	41	89.5	93	2	1.9	1.9	0	0	6	33	2	0	0	0	0	0	0	0	0	0
1	41	2	23	9	1	0	0	4.3	41	89.5	93	1	8.4	9.4	0	0	4	41	2	1	1	1	0	0	0	0	3	3
1	41	2	23	9	1	0	0	4.3	41	89.5	93	2	1.5	2	0	0	4	41	2	0	0	0	0	0	0	0	0	0
1	42	2	23	9	1	0	0	4.3	41	89.5	93	1	2	2	5.4	3.7	5	42	2	1	0	0	1	1	2	1	0	0
1	42	2	23	9	1	0	0	4.3	41	89.5	93	2	1.7	2	4.8	0	5	42	2	0	0	0	1	0	2	0	0	0
1	43	2	23	9	1	0	0	4.3	41	89.5	93	1	1.2	1.3	3.9	4.7	6	43	2	1	0	0	1	1	1	2	0	0
1	43	2	23	9	1	0	0	4.3	41	89.5	93	2	2	2	0	0	6	43	2	0	0	0	0	0	0	0	0	0
2	11	1	28	11	1	1	3.5	2	22.8	113.4	89.8	1	1.5	1.6	0	0	1	11	1	1	0	0	0	0	0	0	0	0
2	11	1	28	11	1	1	3.5	2	22.8	113.4	89.8	2	1.8	1.9	0	0	1	11	1	0	0	0	0	0	0	0	0	0
2	12	1	28	11	1	1	3.5	2	22.8	113.4	89.8	1	1.6	1.6	2.2	2.2	2	12	1	1	0	0	0	0	0	0	0	0
2	12	1	28	11	1	1	3.5	2	22.8	113.4	89.8	2	1.7	1.9	0	0	2	12	1	0	0	0	0	0	0	0	0	0
2	13	1	28	11	1	1	3.5	2	22.8	113.4	89.8	1	1.9	1.4	0	0	3	13	1	1	0	0	0	0	0	0	0	0
2	13	1	28	11	1	1	3.5	2	22.8	113.4	89.8	2	1.7	1.9	0	0	3	13	1	0	0	0	0	0	0	0	0	0
2	21	1	28	11	1	1	3.5	2	22.8	113.4	89.8	1	1.2	1.7	0	0	1	21	1	1	0	0	0	0	0	0	0	0
2	21	1	28	11	1	1	3.5	2	22.8	113.4	89.8	2	1.2	1.6	0	0	1	21	1	0	0	0	0	0	0	0	0	0
2	22	1	28	11	1	1	3.5	2	22.8	113.4	89.8	1	1.4	1.4	0	2	2	22	1	1	0	0	0	0	0	0	0	0
2	22	1	28	11	1	1	3.5	2	22.8	113.4	89.8	2	1.5	1.6	0	0	2	22	1	0	0	0	0	0	0	0	0	0
2	23	1	28	11	1	1	3.5	2	22.8	113.4	89.8	1	1.6	1.4	0	2.3	3	23	1	1	0	0	0	0	0	0	0	0
2	23	1	28	11	1	1	3.5	2	22.8	113.4	89.8	2	1.2	2.4	0	0	3	23	1	0	0	1	0	0	0	0	0	1
2	31	1	28	11	1	1	3.5	2	22.8	113.4	89.8	1	1.8	2.1	0	2.3	4	31	2	1	0	0	0	0	0	0	0	0
2	31	1	28	11	1	1	3.5	2	22.8	113.4	89.8	2	1.2	1.7	0	0	4	31	2	0	0	0	0	0	0	0	0	0
2	32	1	28	11	1	1	3.5	2	22.8	113.4	89.8	1	1.6	1.3	0	0	5	32	2	1	0	0	0	0	0	0	0	0
2	32	1	28	11	1	1	3.5	2	22.8	113.4	89.8	2	1.4	1.8	0	0	5	32	2	0	0	0	0	0	0	0	0	0
2	33	1	28	11	1	1	3.5	2	22.8	113.4	89.8	1	1.2	1.4	0	0	6	33	2	1	0	0	0	0	0	0	0	0
2	33	1	28	11	1	1	3.5	2	22.8	113.4	89.8	2	1.8	2.4	0	0	6	33	2	0	0	1	0	0	0	0	0	1
2	41	1	28	11	1	1	3.5	2	22.8	113.4	89.8	1	1.6	1.4	0	0	4	41	2	1	0	0	0	0	0	0	0	0
2	41	1	28	11	1	1	3.5	2	22.8	113.4	89.8	2	1.9	2.4	0	0	4	41	2	0	0	1	0	0	0	0	0	1
2	42	1	28	11	1	1	3.5	2	22.8	113.4	89.8	1	1.5	0.9	0	2.9	5	42	2	1	0	0	0	1	0	1	0	0
2	42	1	28	11	1	1	3.5	2	22.8	113.4	89.8	2	2	1.4	0	0	5	42	2	0	0	0	0	0	0	0	0	0
2	43	1	28	11	1	1	3.5	2	22.8	113.4	89.8	1	1.8	1.7	0	0	6	43	2	1	0	0	0	0	0	0	0	0
2	43	1	28	11	1	1	3.5	2	22.8	113.4	89.8	2	1.5	1.6	0	0	6	43	2	0	0	0	0	0	0	0	0	0
3	11	2	30	15	1	3.6	1	7.6	30.2	58.1	80.5	1	1.7	1.9	0	0	1	11	1	1	0	0	0	0	0	0	0	0
3	11	2	30	15	1	3.6	1	7.6	30.2	58.1	80.5	2	1.9	1.4	0	0	1	11	1	0	0	0	0	0	0	0	0	0
3	12	2	30	15	1	3.6	1	7.6	30.2	58.1	80.5	1	1.3	1.9	0	0	2	12	1	1	0	0	0	0	0	0	0	0
3	12	2	30	15	1	3.6	1	7.6	30.2	58.1	80.5	2	2	4.6	0	0	2	12	1	0	0	1	0	0	0	0	0	2
3	13	2	30	15	1	3.6	1	7.6	30.2	58.1	80.5	1	2	1.9	0	2.5	3	13	1	1	0	0	0	1	0	1	0	0
3	13	2	30	15	1	3.6	1	7.6	30.2	58.1	80.5	2	3.3	1.9	0	0	3	13	1	0	1	0	0	0	0	0	1	0
3	21	2	30	15	1	3.6	1	7.6	30.2	58.1	80.5	1	2.7	1.3	3.5	0	1	21	1	1	1	0	1	0	1	0	1	0
3	21	2	30	15	1	3.6	1	7.6	30.2	58.1	80.5	2	2	1.2	0	0	1	21	1	0	0	0	0	0	0	0	0	0
3	22	2	30	15	1	3.6	1	7.6	30.2	58.1	80.5	1	1.6	1.3	6.2	0	2	22	1	1	0	0	1	0	3	0	0	0
3	22	2	30	15	1	3.6	1	7.6	30.2	58.1	80.5	2	1.7	1.2	0	0	2	22	1	0	0	0	0	0	0	0	0	0
3	23	2	30	15	1	3.6	1	7.6	30.2	58.1	80.5	1	1.6	1.6	0	6.2	3	23	1	1	0	0	0	1	0	3	0	0
3	23	2	30	15	1	3.6	1	7.6	30.2	58.1	80.5	2	1.6	1.8	0	0	3	23	1	0	0	0	0	0	0	0	0	0
3	31	2	30	15	1	3.6	1	7.6	30.2	58.1	80.5	1	5.9	8.4	0	0	4	31	2	1	1	1	0	0	0	0	2	3
3	31	2	30	15	1	3.6	1	7.6	30.2	58.1	80.5	2	3.9	3	0	0	4	31	2	0	1	1	0	0	0	0	1	1
3	32	2	30	15	1	3.6	1	7.6	30.2	58.1	80.5	1	4	8.4	0	0	5	32	2	1	1	1	0	0	0	0	1	3
3	32	2	30	15	1	3.6	1	7.6	30.2	58.1	80.5	2	1.4	1.9	0	0	5	32	2	0	0	0	0	0	0	0	0	0
3	33	2	30	15	1	3.6	1	7.6	30.2	58.1	80.5	1	1.1	1.1	0	0	6	33	2	1	0	0	0	0	0	0	0	0
3	33	2	30	15	1	3.6	1	7.6	30.2	58.1	80.5	2	2	1.8	0	0	6	33	2	0	0	0	0	0	0	0	0	0
3	41	2	30	15	1	3.6	1	7.6	30.2	58.1	80.5	1	7.5	8.6	0	0	4	41	2	1	1	1	0	0	0	0	3	3
3	41	2	30	15	1	3.6	1	7.6	30.2	58.1	80.5	2	3.3	3.3	0	0	4	41	2	0	1	1	0	0	0	0	1	1
3	42	2	30	15	1	3.6	1	7.6	30.2	58.1	80.5	1	8.2	9	0	0	5	42	2	1	1	1	0	0	0	0	3	3
3	42	2	30	15	1	3.6	1	7.6	30.2	58.1	80.5	2	2.2	1.4	0	0	5	42	2	0	1	0	0	0	0	0	1	0
3	43	2	30	15	1	3.6	1	7.6	30.2	58.1	80.5	1	2.8	2.4	0	0	6	43	2	1	1	1	0	0	0	0	1	1
3	43	2	30	15	1	3.6	1	7.6	30.2	58.1	80.5	2	2	1.9	0	0	6	43	2	0	0	0	0	0	0	0	0	0
4	11	2	22	13	1	1.6	0.9	4.3	18.4	88	104.6	1	1.7	1.8	0	0	1	11	1	1	0	0	0	0	0	0	0	0
4	11	2	22	13	1	1.6	0.9	4.3	18.4	88	104.6	2	1.5	1.2	0	0	1	11	1	0	0	0	0	0	0	0	0	0
4	12	2	22	13	1	1.6	0.9	4.3	18.4	88	104.6	1	2.8	3.2	5.5	0	2	12	1	1	1	1	1	0	2	0	1	1
4	12	2	22	13	1	1.6	0.9	4.3	18.4	88	104.6	2	1.4	1.4	0	0	2	12	1	0	0	0	0	0	0	0	0	0
4	13	2	22	13	1	1.6	0.9	4.3	18.4	88	104.6	1	4	3.6	0	3.9	3	13	1	1	1	1	0	1	0	1	1	1
4	13	2	22	13	1	1.6	0.9	4.3	18.4	88	104.6	2	1.8	2	0	0	3	13	1	0	0	0	0	0	0	0	0	0
4	21	2	22	13	1	1.6	0.9	4.3	18.4	88	104.6	1	1.6	2.2	0	1.9	1	21	1	1	0	1	0	0	0	0	0	1
4	21	2	22	13	1	1.6	0.9	4.3	18.4	88	104.6	2	1.6	1.6	0	0	1	21	1	0	0	0	0	0	0	0	0	0
4	22	2	22	13	1	1.6	0.9	4.3	18.4	88	104.6	1	4.7	3.8	5.9	0	2	22	1	1	1	1	1	0	2	0	2	1
4	22	2	22	13	1	1.6	0.9	4.3	18.4	88	104.6	2	3	3.2	0	0	2	22	1	0	1	1	0	0	0	0	1	1
4	23	2	22	13	1	1.6	0.9	4.3	18.4	88	104.6	1	3.8	2.9	0	6.5	3	23	1	1	1	1	0	1	0	3	1	1
4	23	2	22	13	1	1.6	0.9	4.3	18.4	88	104.6	2	1.8	2.6	0	0	3	23	1	0	0	1	0	0	0	0	0	1
4	31	2	22	13	1	1.6	0.9	4.3	18.4	88	104.6	1	1.7	4.5	0	0	4	31	2	1	0	1	0	0	0	0	0	2
4	31	2	22	13	1	1.6	0.9	4.3	18.4	88	104.6	2	3.2	4.4	0	0	4	31	2	0	1	1	0	0	0	0	1	2
4	32	2	22	13	1	1.6	0.9	4.3	18.4	88	104.6	1	1.9	5.6	0	0	5	32	2	1	0	1	0	0	0	0	0	2
4	32	2	22	13	1	1.6	0.9	4.3	18.4	88	104.6	2	3.1	3.8	0	0	5	32	2	0	1	1	0	0	0	0	1	1
4	33	2	22	13	1	1.6	0.9	4.3	18.4	88	104.6	1	2.4	5.6	0	0	6	33	2	1	1	1	0	0	0	0	1	2
4	33	2	22	13	1	1.6	0.9	4.3	18.4	88	104.6	2	2.9	3.3	0	0	6	33	2	0	1	1	0	0	0	0	1	1
4	41	2	22	13	1	1.6	0.9	4.3	18.4	88	104.6	1	2.4	2.7	0	0	4	41	2	1	1	1	0	0	0	0	1	1
4	41	2	22	13	1	1.6	0.9	4.3	18.4	88	104.6	2	3.5	3.7	0	0	4	41	2	0	1	1	0	0	0	0	1	1
4	42	2	22	13	1	1.6	0.9	4.3	18.4	88	104.6	1	2.5	2.1	0	2.5	5	42	2	1	1	0	0	1	0	1	1	0
4	42	2	22	13	1	1.6	0.9	4.3	18.4	88	104.6	2	3.3	3.5	0	0	5	42	2	0	1	1	0	0	0	0	1	1
4	43	2	22	13	1	1.6	0.9	4.3	18.4	88	104.6	1	0.8	1.7	0	0	6	43	2	1	0	0	0	0	0	0	0	0
4	43	2	22	13	1	1.6	0.9	4.3	18.4	88	104.6	2	2.6	3.3	0	0	6	43	2	0	1	1	0	0	0	0	1	1
5	11	2	32	15	1	3.5	4.7	7.5	40	89.9	100.2	1	1.3	1.4	0	4.8	1	11	1	1	0	0	0	1	0	2	0	0
5	11	2	32	15	1	3.5	4.7	7.5	40	89.9	100.2	2	1.7	4.6	0	0	1	11	1	0	0	1	0	0	0	0	0	2
5	12	2	32	15	1	3.5	4.7	7.5	40	89.9	100.2	1	12.1	10.4	0	0	2	12	1	1	1	1	0	0	0	0	3	3
5	12	2	32	15	1	3.5	4.7	7.5	40	89.9	100.2	2	1.9	7.9	0	0	2	12	1	0	0	1	0	0	0	0	0	3
5	13	2	32	15	1	3.5	4.7	7.5	40	89.9	100.2	1	4.3	12.5	0	2.3	3	13	1	1	1	1	0	0	0	0	2	3
5	13	2	32	15	1	3.5	4.7	7.5	40	89.9	100.2	2	1.9	4.8	0	0	3	13	1	0	0	1	0	0	0	0	0	2
5	21	2	32	15	1	3.5	4.7	7.5	40	89.9	100.2	1	1.9	2.8	0	0	1	21	1	1	0	1	0	0	0	0	0	1
5	21	2	32	15	1	3.5	4.7	7.5	40	89.9	100.2	2	1.7	6.9	0	0	1	21	1	0	0	1	0	0	0	0	0	3
5	22	2	32	15	1	3.5	4.7	7.5	40	89.9	100.2	1	11.2	11.3	0	2.3	2	22	1	1	1	1	0	0	0	0	3	3
5	22	2	32	15	1	3.5	4.7	7.5	40	89.9	100.2	2	5.5	5.6	0	0	2	22	1	0	1	1	0	0	0	0	2	2
5	23	2	32	15	1	3.5	4.7	7.5	40	89.9	100.2	1	3.6	12.7	7.8	2.3	3	23	1	1	1	1	1	0	3	0	1	3
5	23	2	32	15	1	3.5	4.7	7.5	40	89.9	100.2	2	3.8	4.6	0	0	3	23	1	0	1	1	0	0	0	0	1	2
5	31	2	32	15	1	3.5	4.7	7.5	40	89.9	100.2	1	4.5	8	0	2.3	4	31	2	1	1	1	0	0	0	0	2	3
5	31	2	32	15	1	3.5	4.7	7.5	40	89.9	100.2	2	6.9	3.1	0	0	4	31	2	0	1	1	0	0	0	0	3	1
5	32	2	32	15	1	3.5	4.7	7.5	40	89.9	100.2	1	1.7	9	0	0	5	32	2	1	0	1	0	0	0	0	0	3
5	32	2	32	15	1	3.5	4.7	7.5	40	89.9	100.2	2	7.2	2.8	0	0	5	32	2	0	1	1	0	0	0	0	3	1
5	33	2	32	15	1	3.5	4.7	7.5	40	89.9	100.2	1	1.9	11.1	0	0	6	33	2	1	0	1	0	0	0	0	0	3
5	33	2	32	15	1	3.5	4.7	7.5	40	89.9	100.2	2	1.9	2	0	0	6	33	2	0	0	0	0	0	0	0	0	0
5	41	2	32	15	1	3.5	4.7	7.5	40	89.9	100.2	1	3.7	8.8	0	2.5	4	41	2	1	1	1	0	1	0	1	1	3
5	41	2	32	15	1	3.5	4.7	7.5	40	89.9	100.2	2	1.7	3.3	0	0	4	41	2	0	0	1	0	0	0	0	0	1
5	42	2	32	15	1	3.5	4.7	7.5	40	89.9	100.2	1	5.2	9.1	0	2.6	5	42	2	1	1	1	0	1	0	1	2	3
5	42	2	32	15	1	3.5	4.7	7.5	40	89.9	100.2	2	4.5	4.2	0	0	5	42	2	0	1	1	0	0	0	0	2	2
5	43	2	32	15	1	3.5	4.7	7.5	40	89.9	100.2	1	3.4	3.4	0	3.2	6	43	2	1	1	1	0	1	0	1	1	1
5	43	2	32	15	1	3.5	4.7	7.5	40	89.9	100.2	2	1.7	1.4	0	0	6	43	2	0	0	0	0	0	0	0	0	0
6	11	2	28	9	1	0.8	3.1	1.3	34.2	116.9	91.6	1	1.6	1.5	0	0	1	11	1	1	0	0	0	0	0	0	0	0
6	11	2	28	9	1	0.8	3.1	1.3	34.2	116.9	91.6	2	1.4	1.2	0	0	1	11	1	0	0	0	0	0	0	0	0	0
6	12	2	28	9	1	0.8	3.1	1.3	34.2	116.9	91.6	1	1.9	1.8	0	0	2	12	1	1	0	0	0	0	0	0	0	0
6	12	2	28	9	1	0.8	3.1	1.3	34.2	116.9	91.6	2	1.1	1	0	0	2	12	1	0	0	0	0	0	0	0	0	0
6	13	2	28	9	1	0.8	3.1	1.3	34.2	116.9	91.6	1	1.7	2.2	0	6.7	3	13	1	1	0	1	0	1	0	3	0	1
6	13	2	28	9	1	0.8	3.1	1.3	34.2	116.9	91.6	2	1.5	1.8	0	0	3	13	1	0	0	0	0	0	0	0	0	0
6	21	2	28	9	1	0.8	3.1	1.3	34.2	116.9	91.6	1	1.3	1.3	0	0	1	21	1	1	0	0	0	0	0	0	0	0
6	21	2	28	9	1	0.8	3.1	1.3	34.2	116.9	91.6	2	2	1.9	0	0	1	21	1	0	0	0	0	0	0	0	0	0
6	22	2	28	9	1	0.8	3.1	1.3	34.2	116.9	91.6	1	1.9	1.6	0	0	2	22	1	1	0	0	0	0	0	0	0	0
6	22	2	28	9	1	0.8	3.1	1.3	34.2	116.9	91.6	2	0.9	1.6	0	0	2	22	1	0	0	0	0	0	0	0	0	0
6	23	2	28	9	1	0.8	3.1	1.3	34.2	116.9	91.6	1	13	13.2	0	0	3	23	1	1	1	1	0	0	0	0	3	3
6	23	2	28	9	1	0.8	3.1	1.3	34.2	116.9	91.6	2	1.2	1.5	0	0	3	23	1	0	0	0	0	0	0	0	0	0
6	31	2	28	9	1	0.8	3.1	1.3	34.2	116.9	91.6	1	1.2	10.5	0	0	4	31	2	1	0	1	0	0	0	0	0	3
6	31	2	28	9	1	0.8	3.1	1.3	34.2	116.9	91.6	2	1.7	2.5	0	0	4	31	2	0	0	1	0	0	0	0	0	1
6	32	2	28	9	1	0.8	3.1	1.3	34.2	116.9	91.6	1	2.5	8.3	0	0	5	32	2	1	1	1	0	0	0	0	1	3
6	32	2	28	9	1	0.8	3.1	1.3	34.2	116.9	91.6	2	3.1	1.5	0	0	5	32	2	0	1	0	0	0	0	0	1	0
6	33	2	28	9	1	0.8	3.1	1.3	34.2	116.9	91.6	1	1.6	8.6	0	0	6	33	2	1	0	1	0	0	0	0	0	3
6	33	2	28	9	1	0.8	3.1	1.3	34.2	116.9	91.6	2	2.4	1.8	0	0	6	33	2	0	1	0	0	0	0	0	1	0
6	41	2	28	9	1	0.8	3.1	1.3	34.2	116.9	91.6	1	1.7	8.6	0	2.3	4	41	2	1	0	1	0	0	0	0	0	3
6	41	2	28	9	1	0.8	3.1	1.3	34.2	116.9	91.6	2	2.5	2.4	0	0	4	41	2	0	1	1	0	0	0	0	1	1
6	42	2	28	9	1	0.8	3.1	1.3	34.2	116.9	91.6	1	2.1	7.1	0	0	5	42	2	1	0	1	0	0	0	0	0	3
6	42	2	28	9	1	0.8	3.1	1.3	34.2	116.9	91.6	2	2.2	2.1	0	0	5	42	2	0	1	0	0	0	0	0	1	0
6	43	2	28	9	1	0.8	3.1	1.3	34.2	116.9	91.6	1	1.1	9.2	4.2	0	6	43	2	1	0	1	1	0	2	0	0	3
6	43	2	28	9	1	0.8	3.1	1.3	34.2	116.9	91.6	2	2.3	2.3	0	0	6	43	2	0	1	1	0	0	0	0	1	1
7	11	2	25	14	1	1.5	3.3	3.2	24.3	102.2	89.3	1	1.7	1.6	0	0	1	11	1	1	0	0	0	0	0	0	0	0
7	11	2	25	14	1	1.5	3.3	3.2	24.3	102.2	89.3	2	1.7	1.1	0	0	1	11	1	0	0	0	0	0	0	0	0	0
7	12	2	25	14	1	1.5	3.3	3.2	24.3	102.2	89.3	1	1.4	1.3	4.3	3.4	2	12	1	1	0	0	1	1	2	1	0	0
7	12	2	25	14	1	1.5	3.3	3.2	24.3	102.2	89.3	2	1.2	4.6	0	0	2	12	1	0	0	1	0	0	0	0	0	2
7	13	2	25	14	1	1.5	3.3	3.2	24.3	102.2	89.3	1	1.5	0.8	0	5.5	3	13	1	1	0	0	0	1	0	2	0	0
7	13	2	25	14	1	1.5	3.3	3.2	24.3	102.2	89.3	2	1.8	1.9	0	0	3	13	1	0	0	0	0	0	0	0	0	0
7	21	2	25	14	1	1.5	3.3	3.2	24.3	102.2	89.3	1	1.5	1.2	0	0	1	21	1	1	0	0	0	0	0	0	0	0
7	21	2	25	14	1	1.5	3.3	3.2	24.3	102.2	89.3	2	1.8	4	0	0	1	21	1	0	0	1	0	0	0	0	0	1
7	22	2	25	14	1	1.5	3.3	3.2	24.3	102.2	89.3	1	1.4	1.2	0	0	2	22	1	1	0	0	0	0	0	0	0	0
7	22	2	25	14	1	1.5	3.3	3.2	24.3	102.2	89.3	2	1.3	1.4	0	0	2	22	1	0	0	0	0	0	0	0	0	0
7	23	2	25	14	1	1.5	3.3	3.2	24.3	102.2	89.3	1	3.1	1.4	0	7.4	3	23	1	1	1	0	0	1	0	3	1	0
7	23	2	25	14	1	1.5	3.3	3.2	24.3	102.2	89.3	2	1.9	3.6	0	0	3	23	1	0	0	1	0	0	0	0	0	1
7	31	2	25	14	1	1.5	3.3	3.2	24.3	102.2	89.3	1	1.5	7.1	0	0	4	31	2	1	0	1	0	0	0	0	0	3
7	31	2	25	14	1	1.5	3.3	3.2	24.3	102.2	89.3	2	1.8	1.9	0	0	4	31	2	0	0	0	0	0	0	0	0	0
7	32	2	25	14	1	1.5	3.3	3.2	24.3	102.2	89.3	1	1.9	8.1	0	0	5	32	2	1	0	1	0	0	0	0	0	3
7	32	2	25	14	1	1.5	3.3	3.2	24.3	102.2	89.3	2	1.7	2.3	0	0	5	32	2	0	0	1	0	0	0	0	0	1
7	33	2	25	14	1	1.5	3.3	3.2	24.3	102.2	89.3	1	1.5	0.5	0	0	6	33	2	1	0	0	0	0	0	0	0	0
7	33	2	25	14	1	1.5	3.3	3.2	24.3	102.2	89.3	2	2.5	2.4	0	0	6	33	2	0	1	1	0	0	0	0	1	1
7	41	2	25	14	1	1.5	3.3	3.2	24.3	102.2	89.3	1	1.9	5.3	0	0	4	41	2	1	0	1	0	0	0	0	0	2
7	41	2	25	14	1	1.5	3.3	3.2	24.3	102.2	89.3	2	1.3	2.7	0	0	4	41	2	0	0	1	0	0	0	0	0	1
7	42	2	25	14	1	1.5	3.3	3.2	24.3	102.2	89.3	1	2.3	6.5	0	0	5	42	2	1	1	1	0	0	0	0	1	3
7	42	2	25	14	1	1.5	3.3	3.2	24.3	102.2	89.3	2	2.3	2.4	0	0	5	42	2	0	1	1	0	0	0	0	1	1
7	43	2	25	14	1	1.5	3.3	3.2	24.3	102.2	89.3	1	1.6	6.4	0	0	6	43	2	1	0	1	0	0	0	0	0	3
7	43	2	25	14	1	1.5	3.3	3.2	24.3	102.2	89.3	2	1.8	3.1	0	0	6	43	2	0	0	1	0	0	0	0	0	1
8	11	2	27	9.5	1	4.8	2.6	5.4	39.5	98.5	93.1	1	1.7	10.5	0	0	1	11	1	1	0	1	0	0	0	0	0	3
8	11	2	27	9.5	1	4.8	2.6	5.4	39.5	98.5	93.1	2	1.4	1.9	0	0	1	11	1	0	0	0	0	0	0	0	0	0
8	12	2	27	9.5	1	4.8	2.6	5.4	39.5	98.5	93.1	1	11.8	10.7	0	2.8	2	12	1	1	1	1	0	1	0	1	3	3
8	12	2	27	9.5	1	4.8	2.6	5.4	39.5	98.5	93.1	2	1.8	2.7	0	0	2	12	1	0	0	1	0	0	0	0	0	1
8	13	2	27	9.5	1	4.8	2.6	5.4	39.5	98.5	93.1	1	1.6	10.7	0	0	3	13	1	1	0	1	0	0	0	0	0	3
8	13	2	27	9.5	1	4.8	2.6	5.4	39.5	98.5	93.1	2	1.4	1.9	0	0	3	13	1	0	0	0	0	0	0	0	0	0
8	21	2	27	9.5	1	4.8	2.6	5.4	39.5	98.5	93.1	1	1.2	1.7	0	0	1	21	1	1	0	0	0	0	0	0	0	0
8	21	2	27	9.5	1	4.8	2.6	5.4	39.5	98.5	93.1	2	2	1.6	0	0	1	21	1	0	0	0	0	0	0	0	0	0
8	22	2	27	9.5	1	4.8	2.6	5.4	39.5	98.5	93.1	1	1.3	11.3	6	3.1	2	22	1	1	0	1	1	1	2	1	0	3
8	22	2	27	9.5	1	4.8	2.6	5.4	39.5	98.5	93.1	2	1.9	3.2	0	0	2	22	1	0	0	1	0	0	0	0	0	1
8	23	2	27	9.5	1	4.8	2.6	5.4	39.5	98.5	93.1	1	1.4	2	9.6	7.3	3	23	1	1	0	0	1	1	3	3	0	0
8	23	2	27	9.5	1	4.8	2.6	5.4	39.5	98.5	93.1	2	1.7	3	0	0	3	23	1	0	0	1	0	0	0	0	0	1
8	31	2	27	9.5	1	4.8	2.6	5.4	39.5	98.5	93.1	1	1.9	2.8	0	0	4	31	2	1	0	1	0	0	0	0	0	1
8	31	2	27	9.5	1	4.8	2.6	5.4	39.5	98.5	93.1	2	2.4	2.4	0	0	4	31	2	0	1	1	0	0	0	0	1	1
8	32	2	27	9.5	1	4.8	2.6	5.4	39.5	98.5	93.1	1	1.3	1.7	5.3	7.3	5	32	2	1	0	0	1	1	2	3	0	0
8	32	2	27	9.5	1	4.8	2.6	5.4	39.5	98.5	93.1	2	1.3	1.3	0	0	5	32	2	0	0	0	0	0	0	0	0	0
8	33	2	27	9.5	1	4.8	2.6	5.4	39.5	98.5	93.1	1	1.2	9.9	3.7	0	6	33	2	1	0	1	1	0	1	0	0	3
8	33	2	27	9.5	1	4.8	2.6	5.4	39.5	98.5	93.1	2	1.6	2.9	0	0	6	33	2	0	0	1	0	0	0	0	0	1
8	41	2	27	9.5	1	4.8	2.6	5.4	39.5	98.5	93.1	1	5.5	6.8	0	0	4	41	2	1	1	1	0	0	0	0	2	3
8	41	2	27	9.5	1	4.8	2.6	5.4	39.5	98.5	93.1	2	3.2	7.7	0	0	4	41	2	0	1	1	0	0	0	0	1	3
8	42	2	27	9.5	1	4.8	2.6	5.4	39.5	98.5	93.1	1	1.4	9	4.7	0	5	42	2	1	0	1	1	0	2	0	0	3
8	42	2	27	9.5	1	4.8	2.6	5.4	39.5	98.5	93.1	2	1.6	2.8	0	0	5	42	2	0	0	1	0	0	0	0	0	1
8	43	2	27	9.5	1	4.8	2.6	5.4	39.5	98.5	93.1	1	1.1	1	5.6	0	6	43	2	1	0	0	1	0	2	0	0	0
8	43	2	27	9.5	1	4.8	2.6	5.4	39.5	98.5	93.1	2	2.3	2.8	0	0	6	43	2	0	1	1	0	0	0	0	1	1
9	11	2	28	8.5	1	2.6	5.8	7.8	44.6	103.1	91.1	1	2.7	2.4	0	0	1	11	1	1	1	1	0	0	0	0	1	1
9	11	2	28	8.5	1	2.6	5.8	7.8	44.6	103.1	91.1	2	0.8	2.5	0	0	1	11	1	0	0	1	0	0	0	0	0	1
9	12	2	28	8.5	1	2.6	5.8	7.8	44.6	103.1	91.1	1	2.7	1.9	6.6	7	2	12	1	1	1	0	1	1	3	3	1	0
9	12	2	28	8.5	1	2.6	5.8	7.8	44.6	103.1	91.1	2	1.2	2.1	0	0	2	12	1	0	0	0	0	0	0	0	0	0
9	13	2	28	8.5	1	2.6	5.8	7.8	44.6	103.1	91.1	1	1.1	1.5	2.1	6.8	3	13	1	1	0	0	0	1	0	3	0	0
9	13	2	28	8.5	1	2.6	5.8	7.8	44.6	103.1	91.1	2	2.6	2.6	0	0	3	13	1	0	1	1	0	0	0	0	1	1
9	21	2	28	8.5	1	2.6	5.8	7.8	44.6	103.1	91.1	1	1.6	2.8	0	0	1	21	1	1	0	1	0	0	0	0	0	1
9	21	2	28	8.5	1	2.6	5.8	7.8	44.6	103.1	91.1	2	1.7	2.1	0	0	1	21	1	0	0	0	0	0	0	0	0	0
9	22	2	28	8.5	1	2.6	5.8	7.8	44.6	103.1	91.1	1	2	2.8	5.9	2.2	2	22	1	1	0	1	1	0	2	0	0	1
9	22	2	28	8.5	1	2.6	5.8	7.8	44.6	103.1	91.1	2	1.4	1.5	0	0	2	22	1	0	0	0	0	0	0	0	0	0
9	23	2	28	8.5	1	2.6	5.8	7.8	44.6	103.1	91.1	1	1.4	1.4	0	6.7	3	23	1	1	0	0	0	1	0	3	0	0
9	23	2	28	8.5	1	2.6	5.8	7.8	44.6	103.1	91.1	2	3.1	3.4	0	0	3	23	1	0	1	1	0	0	0	0	1	1
9	31	2	28	8.5	1	2.6	5.8	7.8	44.6	103.1	91.1	1	2.2	7	0	2.3	4	31	2	1	1	1	0	0	0	0	1	3
9	31	2	28	8.5	1	2.6	5.8	7.8	44.6	103.1	91.1	2	2.6	3.2	0	0	4	31	2	0	1	1	0	0	0	0	1	1
9	32	2	28	8.5	1	2.6	5.8	7.8	44.6	103.1	91.1	1	2.8	8.2	5.5	0	5	32	2	1	1	1	1	0	2	0	1	3
9	32	2	28	8.5	1	2.6	5.8	7.8	44.6	103.1	91.1	2	3.3	3.2	0	0	5	32	2	0	1	1	0	0	0	0	1	1
9	33	2	28	8.5	1	2.6	5.8	7.8	44.6	103.1	91.1	1	11.1	10.4	0	0	6	33	2	1	1	1	0	0	0	0	3	3
9	33	2	28	8.5	1	2.6	5.8	7.8	44.6	103.1	91.1	2	2.5	2.5	0	0	6	33	2	0	1	1	0	0	0	0	1	1
9	41	2	28	8.5	1	2.6	5.8	7.8	44.6	103.1	91.1	1	2.2	7.7	0	0	4	41	2	1	1	1	0	0	0	0	1	3
9	41	2	28	8.5	1	2.6	5.8	7.8	44.6	103.1	91.1	2	1.7	3.6	0	0	4	41	2	0	0	1	0	0	0	0	0	1
9	42	2	28	8.5	1	2.6	5.8	7.8	44.6	103.1	91.1	1	2	7	0	0	5	42	2	1	0	1	0	0	0	0	0	3
9	42	2	28	8.5	1	2.6	5.8	7.8	44.6	103.1	91.1	2	3.4	11.9	0	0	5	42	2	0	1	1	0	0	0	0	1	3
9	43	2	28	8.5	1	2.6	5.8	7.8	44.6	103.1	91.1	1	10	9.8	0	0	6	43	2	1	1	1	0	0	0	0	3	3
9	43	2	28	8.5	1	2.6	5.8	7.8	44.6	103.1	91.1	2	1.9	9.6	0	0	6	43	2	0	0	1	0	0	0	0	0	3
10	11	2	28	11	1	1.7	4.1	5.7	25.4	114.7	107.9	1	1.3	1.4	0	0	1	11	1	1	0	0	0	0	0	0	0	0
10	11	2	28	11	1	1.7	4.1	5.7	25.4	114.7	107.9	2	1.3	1.4	0	0	1	11	1	0	0	0	0	0	0	0	0	0
10	12	2	28	11	1	1.7	4.1	5.7	25.4	114.7	107.9	1	1.4	1.2	0	0	2	12	1	1	0	0	0	0	0	0	0	0
10	12	2	28	11	1	1.7	4.1	5.7	25.4	114.7	107.9	2	1.2	1.3	0	0	2	12	1	0	0	0	0	0	0	0	0	0
10	13	2	28	11	1	1.7	4.1	5.7	25.4	114.7	107.9	1	2.4	1.8	0	0	3	13	1	1	1	0	0	0	0	0	1	0
10	13	2	28	11	1	1.7	4.1	5.7	25.4	114.7	107.9	2	1.9	1.4	0	0	3	13	1	0	0	0	0	0	0	0	0	0
10	21	2	28	11	1	1.7	4.1	5.7	25.4	114.7	107.9	1	1.3	1.7	0	0	1	21	1	1	0	0	0	0	0	0	0	0
10	21	2	28	11	1	1.7	4.1	5.7	25.4	114.7	107.9	2	1.6	1.2	0	0	1	21	1	0	0	0	0	0	0	0	0	0
10	22	2	28	11	1	1.7	4.1	5.7	25.4	114.7	107.9	1	1.9	1.7	0	0	2	22	1	1	0	0	0	0	0	0	0	0
10	22	2	28	11	1	1.7	4.1	5.7	25.4	114.7	107.9	2	1.4	1.7	0	0	2	22	1	0	0	0	0	0	0	0	0	0
10	23	2	28	11	1	1.7	4.1	5.7	25.4	114.7	107.9	1	3.1	3.7	0	3	3	23	1	1	1	1	0	1	0	1	1	1
10	23	2	28	11	1	1.7	4.1	5.7	25.4	114.7	107.9	2	1.6	1.8	0	0	3	23	1	0	0	0	0	0	0	0	0	0
10	31	2	28	11	1	1.7	4.1	5.7	25.4	114.7	107.9	1	1.5	6.6	1.1	2.3	4	31	2	1	0	1	0	0	0	0	0	3
10	31	2	28	11	1	1.7	4.1	5.7	25.4	114.7	107.9	2	2.2	1.4	0	0	4	31	2	0	1	0	0	0	0	0	1	0
10	32	2	28	11	1	1.7	4.1	5.7	25.4	114.7	107.9	1	1.2	7.5	2	0	5	32	2	1	0	1	0	0	0	0	0	3
10	32	2	28	11	1	1.7	4.1	5.7	25.4	114.7	107.9	2	3	1.7	0	0	5	32	2	0	1	0	0	0	0	0	1	0
10	33	2	28	11	1	1.7	4.1	5.7	25.4	114.7	107.9	1	1.9	2	0	0	6	33	2	1	0	0	0	0	0	0	0	0
10	33	2	28	11	1	1.7	4.1	5.7	25.4	114.7	107.9	2	2.9	2.5	0	0	6	33	2	0	1	1	0	0	0	0	1	1
10	41	2	28	11	1	1.7	4.1	5.7	25.4	114.7	107.9	1	1.6	7.1	1.6	0	4	41	2	1	0	1	0	0	0	0	0	3
10	41	2	28	11	1	1.7	4.1	5.7	25.4	114.7	107.9	2	2.2	2	0	0	4	41	2	0	1	0	0	0	0	0	1	0
10	42	2	28	11	1	1.7	4.1	5.7	25.4	114.7	107.9	1	1.4	6.5	2	0	5	42	2	1	0	1	0	0	0	0	0	3
10	42	2	28	11	1	1.7	4.1	5.7	25.4	114.7	107.9	2	2.6	2.1	0	0	5	42	2	0	1	0	0	0	0	0	1	0
10	43	2	28	11	1	1.7	4.1	5.7	25.4	114.7	107.9	1	2.2	5.7	0	0	6	43	2	1	1	1	0	0	0	0	1	2
10	43	2	28	11	1	1.7	4.1	5.7	25.4	114.7	107.9	2	2.6	2	0	0	6	43	2	0	1	0	0	0	0	0	1	0
11	11	2	20	8	1	2.7	4.6	4.8	41.9	101.7	93	1	1.1	1.5	0	6.6	1	11	1	1	0	0	0	1	0	3	0	0
11	11	2	20	8	1	2.7	4.6	4.8	41.9	101.7	93	2	1.6	1.3	0	0	1	11	1	0	0	0	0	0	0	0	0	0
11	12	2	20	8	1	2.7	4.6	4.8	41.9	101.7	93	1	1.3	1.7	0	0	2	12	1	1	0	0	0	0	0	0	0	0
11	12	2	20	8	1	2.7	4.6	4.8	41.9	101.7	93	2	1.3	1.5	0	0	2	12	1	0	0	0	0	0	0	0	0	0
11	13	2	20	8	1	2.7	4.6	4.8	41.9	101.7	93	1	1.6	2.4	0	5.6	3	13	1	1	0	1	0	1	0	2	0	1
11	13	2	20	8	1	2.7	4.6	4.8	41.9	101.7	93	2	1.6	4.3	0	0	3	13	1	0	0	1	0	0	0	0	0	2
11	21	2	20	8	1	2.7	4.6	4.8	41.9	101.7	93	1	1.1	1.3	0	0	1	21	1	1	0	0	0	0	0	0	0	0
11	21	2	20	8	1	2.7	4.6	4.8	41.9	101.7	93	2	1.1	1.4	0	0	1	21	1	0	0	0	0	0	0	0	0	0
11	22	2	20	8	1	2.7	4.6	4.8	41.9	101.7	93	1	2.5	2.9	0	0	2	22	1	1	1	1	0	0	0	0	1	1
11	22	2	20	8	1	2.7	4.6	4.8	41.9	101.7	93	2	1.2	3.3	0	0	2	22	1	0	0	1	0	0	0	0	0	1
11	23	2	20	8	1	2.7	4.6	4.8	41.9	101.7	93	1	2	2	0	8.6	3	23	1	1	0	0	0	1	0	3	0	0
11	23	2	20	8	1	2.7	4.6	4.8	41.9	101.7	93	2	3	2.9	0	0	3	23	1	0	1	1	0	0	0	0	1	1
11	31	2	20	8	1	2.7	4.6	4.8	41.9	101.7	93	1	2	2.4	0	0	4	31	2	1	0	1	0	0	0	0	0	1
11	31	2	20	8	1	2.7	4.6	4.8	41.9	101.7	93	2	1	2	0	0	4	31	2	0	0	0	0	0	0	0	0	0
11	32	2	20	8	1	2.7	4.6	4.8	41.9	101.7	93	1	1.4	1.6	0	2.6	5	32	2	1	0	0	0	1	0	1	0	0
11	32	2	20	8	1	2.7	4.6	4.8	41.9	101.7	93	2	1.6	1.8	0	0	5	32	2	0	0	0	0	0	0	0	0	0
11	33	2	20	8	1	2.7	4.6	4.8	41.9	101.7	93	1	1.1	1.3	0	0	6	33	2	1	0	0	0	0	0	0	0	0
11	33	2	20	8	1	2.7	4.6	4.8	41.9	101.7	93	2	2	2.7	0	0	6	33	2	0	0	1	0	0	0	0	0	1
11	41	2	20	8	1	2.7	4.6	4.8	41.9	101.7	93	1	1.5	2.4	0	1.8	4	41	2	1	0	1	0	0	0	0	0	1
11	41	2	20	8	1	2.7	4.6	4.8	41.9	101.7	93	2	1.5	1.4	0	0	4	41	2	0	0	0	0	0	0	0	0	0
11	42	2	20	8	1	2.7	4.6	4.8	41.9	101.7	93	1	1.5	1.5	0	3.2	5	42	2	1	0	0	0	1	0	1	0	0
11	42	2	20	8	1	2.7	4.6	4.8	41.9	101.7	93	2	1.8	1.9	0	0	5	42	2	0	0	0	0	0	0	0	0	0
11	43	2	20	8	1	2.7	4.6	4.8	41.9	101.7	93	1	1.1	1.2	5.4	5.5	6	43	2	1	0	0	1	1	2	2	0	0
11	43	2	20	8	1	2.7	4.6	4.8	41.9	101.7	93	2	1.6	1.4	0	0	6	43	2	0	0	0	0	0	0	0	0	0
12	11	2	25	13	1	0	0.5	5	45.7	98.3	93.2	1	1.7	1.7	0	0	1	11	1	1	0	0	0	0	0	0	0	0
12	11	2	25	13	1	0	0.5	5	45.7	98.3	93.2	2	1.4	0.9	0	0	1	11	1	0	0	0	0	0	0	0	0	0
12	12	2	25	13	1	0	0.5	5	45.7	98.3	93.2	1	2.8	2.4	6.7	5.4	2	12	1	1	1	1	1	1	3	2	1	1
12	12	2	25	13	1	0	0.5	5	45.7	98.3	93.2	2	1.5	1.5	0	0	2	12	1	0	0	0	0	0	0	0	0	0
12	13	2	25	13	1	0	0.5	5	45.7	98.3	93.2	1	2.4	2.2	0	3.4	3	13	1	1	1	1	0	1	0	1	1	1
12	13	2	25	13	1	0	0.5	5	45.7	98.3	93.2	2	1.8	2.1	0	0	3	13	1	0	0	0	0	0	0	0	0	0
12	21	2	25	13	1	0	0.5	5	45.7	98.3	93.2	1	1.8	1.5	6.2	0	1	21	1	1	0	0	1	0	3	0	0	0
12	21	2	25	13	1	0	0.5	5	45.7	98.3	93.2	2	2	2.2	0	0	1	21	1	0	0	1	0	0	0	0	0	1
12	22	2	25	13	1	0	0.5	5	45.7	98.3	93.2	1	2.5	1.7	0	2	2	22	1	1	1	0	0	0	0	0	1	0
12	22	2	25	13	1	0	0.5	5	45.7	98.3	93.2	2	1.8	2.3	0	0	2	22	1	0	0	1	0	0	0	0	0	1
12	23	2	25	13	1	0	0.5	5	45.7	98.3	93.2	1	2	2	0	6.8	3	23	1	1	0	0	0	1	0	3	0	0
12	23	2	25	13	1	0	0.5	5	45.7	98.3	93.2	2	1.9	1.7	0	0	3	23	1	0	0	0	0	0	0	0	0	0
12	31	2	25	13	1	0	0.5	5	45.7	98.3	93.2	1	1.5	1.3	6.2	4.8	4	31	2	1	0	0	1	1	3	2	0	0
12	31	2	25	13	1	0	0.5	5	45.7	98.3	93.2	2	1.9	2.9	0	0	4	31	2	0	0	1	0	0	0	0	0	1
12	32	2	25	13	1	0	0.5	5	45.7	98.3	93.2	1	2	2.2	0	2	5	32	2	1	0	1	0	0	0	0	0	1
12	32	2	25	13	1	0	0.5	5	45.7	98.3	93.2	2	1.6	2.1	0	0	5	32	2	0	0	0	0	0	0	0	0	0
12	33	2	25	13	1	0	0.5	5	45.7	98.3	93.2	1	1.3	1.4	0	2.3	6	33	2	1	0	0	0	0	0	0	0	0
12	33	2	25	13	1	0	0.5	5	45.7	98.3	93.2	2	2	2.3	0	0	6	33	2	0	0	1	0	0	0	0	0	1
12	41	2	25	13	1	0	0.5	5	45.7	98.3	93.2	1	1.7	1.4	3.2	4.7	4	41	2	1	0	0	1	1	1	2	0	0
12	41	2	25	13	1	0	0.5	5	45.7	98.3	93.2	2	1.9	2.6	0	0	4	41	2	0	0	1	0	0	0	0	0	1
12	42	2	25	13	1	0	0.5	5	45.7	98.3	93.2	1	1.7	2.2	3.1	3.9	5	42	2	1	0	1	1	1	1	1	0	1
12	42	2	25	13	1	0	0.5	5	45.7	98.3	93.2	2	1.9	3.5	0	0	5	42	2	0	0	1	0	0	0	0	0	1
12	43	2	25	13	1	0	0.5	5	45.7	98.3	93.2	1	1.4	1.7	0	0	6	43	2	1	0	0	0	0	0	0	0	0
12	43	2	25	13	1	0	0.5	5	45.7	98.3	93.2	2	3	3.1	0	0	6	43	2	0	1	1	0	0	0	0	1	1
13	11	2	28	16	1	0.7	0.5	7.3	39.4	84.4	93.2	1	1.7	1.6	0	0	1	11	1	1	0	0	0	0	0	0	0	0
13	11	2	28	16	1	0.7	0.5	7.3	39.4	84.4	93.2	2	1.6	2.1	0	0	1	11	1	0	0	0	0	0	0	0	0	0
13	12	2	28	16	1	0.7	0.5	7.3	39.4	84.4	93.2	1	2.9	2.7	0	2	2	12	1	1	1	1	0	0	0	0	1	1
13	12	2	28	16	1	0.7	0.5	7.3	39.4	84.4	93.2	2	1.9	2.3	0	0	2	12	1	0	0	1	0	0	0	0	0	1
13	13	2	28	16	1	0.7	0.5	7.3	39.4	84.4	93.2	1	2.2	2.4	0	0	3	13	1	1	1	1	0	0	0	0	1	1
13	13	2	28	16	1	0.7	0.5	7.3	39.4	84.4	93.2	2	1.7	2.1	0	0	3	13	1	0	0	0	0	0	0	0	0	0
13	21	2	28	16	1	0.7	0.5	7.3	39.4	84.4	93.2	1	1.9	1.9	0	0	1	21	1	1	0	0	0	0	0	0	0	0
13	21	2	28	16	1	0.7	0.5	7.3	39.4	84.4	93.2	2	1.9	1.7	0	0	1	21	1	0	0	0	0	0	0	0	0	0
13	22	2	28	16	1	0.7	0.5	7.3	39.4	84.4	93.2	1	3.6	3	0	0	2	22	1	1	1	1	0	0	0	0	1	1
13	22	2	28	16	1	0.7	0.5	7.3	39.4	84.4	93.2	2	2	1.7	0	0	2	22	1	0	0	0	0	0	0	0	0	0
13	23	2	28	16	1	0.7	0.5	7.3	39.4	84.4	93.2	1	2	1.8	0	3.7	3	23	1	1	0	0	0	1	0	1	0	0
13	23	2	28	16	1	0.7	0.5	7.3	39.4	84.4	93.2	2	1.7	1.8	0	0	3	23	1	0	0	0	0	0	0	0	0	0
13	31	2	28	16	1	0.7	0.5	7.3	39.4	84.4	93.2	1	1.6	5.7	0	0	4	31	2	1	0	1	0	0	0	0	0	2
13	31	2	28	16	1	0.7	0.5	7.3	39.4	84.4	93.2	2	2	2.3	0	0	4	31	2	0	0	1	0	0	0	0	0	1
13	32	2	28	16	1	0.7	0.5	7.3	39.4	84.4	93.2	1	1.7	6.8	3.3	0	5	32	2	1	0	1	1	0	1	0	0	3
13	32	2	28	16	1	0.7	0.5	7.3	39.4	84.4	93.2	2	2.8	2	0	0	5	32	2	0	1	0	0	0	0	0	1	0
13	33	2	28	16	1	0.7	0.5	7.3	39.4	84.4	93.2	1	1.7	2.3	0	0	6	33	2	1	0	1	0	0	0	0	0	1
13	33	2	28	16	1	0.7	0.5	7.3	39.4	84.4	93.2	2	1.7	2.3	0	0	6	33	2	0	0	1	0	0	0	0	0	1
13	41	2	28	16	1	0.7	0.5	7.3	39.4	84.4	93.2	1	1.4	6.9	0	0	4	41	2	1	0	1	0	0	0	0	0	3
13	41	2	28	16	1	0.7	0.5	7.3	39.4	84.4	93.2	2	2.1	2.2	0	0	4	41	2	0	0	1	0	0	0	0	0	1
13	42	2	28	16	1	0.7	0.5	7.3	39.4	84.4	93.2	1	2	8	2.1	0	5	42	2	1	0	1	0	0	0	0	0	3
13	42	2	28	16	1	0.7	0.5	7.3	39.4	84.4	93.2	2	2.8	2.2	0	0	5	42	2	0	1	1	0	0	0	0	1	1
13	43	2	28	16	1	0.7	0.5	7.3	39.4	84.4	93.2	1	1.5	1.5	0	0	6	43	2	1	0	0	0	0	0	0	0	0
13	43	2	28	16	1	0.7	0.5	7.3	39.4	84.4	93.2	2	2.5	2.5	0	0	6	43	2	0	1	1	0	0	0	0	1	1
14	11	1	18	10	1	0	0	2	35.5	100.5	84.9	1	1.1	1.4	0	0	1	11	1	1	0	0	0	0	0	0	0	0
14	11	1	18	10	1	0	0	2	35.5	100.5	84.9	2	1.7	1.3	0	0	1	11	1	0	0	0	0	0	0	0	0	0
14	12	1	18	10	1	0	0	2	35.5	100.5	84.9	1	0	1.7	0	0	2	12	1	1	0	0	0	0	0	0	0	0
14	12	1	18	10	1	0	0	2	35.5	100.5	84.9	2	0	1	0	0	2	12	1	0	0	0	0	0	0	0	0	0
14	13	1	18	10	1	0	0	2	35.5	100.5	84.9	1	0	1.3	0	0	3	13	1	1	0	0	0	0	0	0	0	0
14	13	1	18	10	1	0	0	2	35.5	100.5	84.9	2	0	0	0	0	3	13	1	0	0	0	0	0	0	0	0	0
14	21	1	18	10	1	0	0	2	35.5	100.5	84.9	1	0	1.3	0	0	1	21	1	1	0	0	0	0	0	0	0	0
14	21	1	18	10	1	0	0	2	35.5	100.5	84.9	2	0	1	0	0	1	21	1	0	0	0	0	0	0	0	0	0
14	22	1	18	10	1	0	0	2	35.5	100.5	84.9	1	1.5	1.7	0	0	2	22	1	1	0	0	0	0	0	0	0	0
14	22	1	18	10	1	0	0	2	35.5	100.5	84.9	2	0	1	0	0	2	22	1	0	0	0	0	0	0	0	0	0
14	23	1	18	10	1	0	0	2	35.5	100.5	84.9	1	1.8	1.7	0	0	3	23	1	1	0	0	0	0	0	0	0	0
14	23	1	18	10	1	0	0	2	35.5	100.5	84.9	2	0	1.5	0	0	3	23	1	0	0	0	0	0	0	0	0	0
14	31	1	18	10	1	0	0	2	35.5	100.5	84.9	1	1.4	1.9	0	0	4	31	2	1	0	0	0	0	0	0	0	0
14	31	1	18	10	1	0	0	2	35.5	100.5	84.9	2	1.3	2.1	0	0	4	31	2	0	0	0	0	0	0	0	0	0
14	32	1	18	10	1	0	0	2	35.5	100.5	84.9	1	1.4	1.9	0	0	5	32	2	1	0	0	0	0	0	0	0	0
14	32	1	18	10	1	0	0	2	35.5	100.5	84.9	2	1.7	2.6	0	0	5	32	2	0	0	1	0	0	0	0	0	1
14	33	1	18	10	1	0	0	2	35.5	100.5	84.9	1	1.9	2.3	0	0	6	33	2	1	0	1	0	0	0	0	0	1
14	33	1	18	10	1	0	0	2	35.5	100.5	84.9	2	1	1.5	0	0	6	33	2	0	0	0	0	0	0	0	0	0
14	41	1	18	10	1	0	0	2	35.5	100.5	84.9	1	1.9	2.3	0	0	4	41	2	1	0	1	0	0	0	0	0	1
14	41	1	18	10	1	0	0	2	35.5	100.5	84.9	2	1.2	1.6	0	0	4	41	2	0	0	0	0	0	0	0	0	0
14	42	1	18	10	1	0	0	2	35.5	100.5	84.9	1	1.4	1.4	0	0	5	42	2	1	0	0	0	0	0	0	0	0
14	42	1	18	10	1	0	0	2	35.5	100.5	84.9	2	2	1.6	0	0	5	42	2	0	0	0	0	0	0	0	0	0
14	43	1	18	10	1	0	0	2	35.5	100.5	84.9	1	1.2	2.1	0	0	6	43	2	1	0	0	0	0	0	0	0	0
14	43	1	18	10	1	0	0	2	35.5	100.5	84.9	2	1.1	1.5	0	0	6	43	2	0	0	0	0	0	0	0	0	0
15	11	2	30	12	1	2.3	3.9	3.5	30.3	92.3	87.7	1	2.1	2.3	0	0	1	11	1	1	0	1	0	0	0	0	0	1
15	11	2	30	12	1	2.3	3.9	3.5	30.3	92.3	87.7	2	1.5	1.6	0	0	1	11	1	0	0	0	0	0	0	0	0	0
15	12	2	30	12	1	2.3	3.9	3.5	30.3	92.3	87.7	1	1.3	2.5	0	4.3	2	12	1	1	0	1	0	1	0	2	0	1
15	12	2	30	12	1	2.3	3.9	3.5	30.3	92.3	87.7	2	1.1	2.4	0	0	2	12	1	0	0	1	0	0	0	0	0	1
15	13	2	30	12	1	2.3	3.9	3.5	30.3	92.3	87.7	1	1.9	2.5	0	0	3	13	1	1	0	1	0	0	0	0	0	1
15	13	2	30	12	1	2.3	3.9	3.5	30.3	92.3	87.7	2	1.3	2.1	0	0	3	13	1	0	0	0	0	0	0	0	0	0
15	21	2	30	12	1	2.3	3.9	3.5	30.3	92.3	87.7	1	2.3	11.2	0	0	1	21	1	1	1	1	0	0	0	0	1	3
15	21	2	30	12	1	2.3	3.9	3.5	30.3	92.3	87.7	2	1.5	2.1	0	0	1	21	1	0	0	0	0	0	0	0	0	0
15	22	2	30	12	1	2.3	3.9	3.5	30.3	92.3	87.7	1	1.8	3	0	0	2	22	1	1	0	1	0	0	0	0	0	1
15	22	2	30	12	1	2.3	3.9	3.5	30.3	92.3	87.7	2	1.9	2.9	0	0	2	22	1	0	0	1	0	0	0	0	0	1
15	23	2	30	12	1	2.3	3.9	3.5	30.3	92.3	87.7	1	1.8	3	0	0	3	23	1	1	0	1	0	0	0	0	0	1
15	23	2	30	12	1	2.3	3.9	3.5	30.3	92.3	87.7	2	1.5	2.3	0	0	3	23	1	0	0	1	0	0	0	0	0	1
15	31	2	30	12	1	2.3	3.9	3.5	30.3	92.3	87.7	1	1.6	7.1	2.1	2.3	4	31	2	1	0	1	0	0	0	0	0	3
15	31	2	30	12	1	2.3	3.9	3.5	30.3	92.3	87.7	2	2.8	1.8	0	0	4	31	2	0	1	0	0	0	0	0	1	0
15	32	2	30	12	1	2.3	3.9	3.5	30.3	92.3	87.7	1	1.4	8.2	0	0	5	32	2	1	0	1	0	0	0	0	0	3
15	32	2	30	12	1	2.3	3.9	3.5	30.3	92.3	87.7	2	2.4	2.3	0	0	5	32	2	0	1	1	0	0	0	0	1	1
15	33	2	30	12	1	2.3	3.9	3.5	30.3	92.3	87.7	1	1.9	6.5	2	0	6	33	2	1	0	1	0	0	0	0	0	3
15	33	2	30	12	1	2.3	3.9	3.5	30.3	92.3	87.7	2	1.6	2	0	0	6	33	2	0	0	0	0	0	0	0	0	0
15	41	2	30	12	1	2.3	3.9	3.5	30.3	92.3	87.7	1	1.1	8.2	1.9	2.7	4	41	2	1	0	1	0	1	0	1	0	3
15	41	2	30	12	1	2.3	3.9	3.5	30.3	92.3	87.7	2	4.4	1.9	0	0	4	41	2	0	1	0	0	0	0	0	2	0
15	42	2	30	12	1	2.3	3.9	3.5	30.3	92.3	87.7	1	3.1	8.9	0	0	5	42	2	1	1	1	0	0	0	0	1	3
15	42	2	30	12	1	2.3	3.9	3.5	30.3	92.3	87.7	2	1.9	1.3	0	0	5	42	2	0	0	0	0	0	0	0	0	0
15	43	2	30	12	1	2.3	3.9	3.5	30.3	92.3	87.7	1	1.4	2.4	4.6	0	6	43	2	1	0	1	1	0	2	0	0	1
15	43	2	30	12	1	2.3	3.9	3.5	30.3	92.3	87.7	2	3.1	1.6	0	0	6	43	2	0	1	0	0	0	0	0	1	0
16	11	2	27	10	1	0.9	3.1	4.6	40.9	102.3	89.4	1	1.4	1.6	0	0	1	11	1	1	0	0	0	0	0	0	0	0
16	11	2	27	10	1	0.9	3.1	4.6	40.9	102.3	89.4	2	1.7	1.2	0	0	1	11	1	0	0	0	0	0	0	0	0	0
16	12	2	27	10	1	0.9	3.1	4.6	40.9	102.3	89.4	1	1	2	2	6.8	2	12	1	1	0	0	0	1	0	3	0	0
16	12	2	27	10	1	0.9	3.1	4.6	40.9	102.3	89.4	2	1.1	0	0	0	2	12	1	0	0	0	0	0	0	0	0	0
16	13	2	27	10	1	0.9	3.1	4.6	40.9	102.3	89.4	1	1.1	1.8	2.2	0	3	13	1	1	0	0	0	0	0	0	0	0
16	13	2	27	10	1	0.9	3.1	4.6	40.9	102.3	89.4	2	1.8	2	0	0	3	13	1	0	0	0	0	0	0	0	0	0
16	21	2	27	10	1	0.9	3.1	4.6	40.9	102.3	89.4	1	1.3	1.8	0	0	1	21	1	1	0	0	0	0	0	0	0	0
16	21	2	27	10	1	0.9	3.1	4.6	40.9	102.3	89.4	2	1.1	1.8	0	0	1	21	1	0	0	0	0	0	0	0	0	0
16	22	2	27	10	1	0.9	3.1	4.6	40.9	102.3	89.4	1	1.5	1.7	0	2.2	2	22	1	1	0	0	0	0	0	0	0	0
16	22	2	27	10	1	0.9	3.1	4.6	40.9	102.3	89.4	2	1.1	2	0	0	2	22	1	0	0	0	0	0	0	0	0	0
16	23	2	27	10	1	0.9	3.1	4.6	40.9	102.3	89.4	1	1.6	1.4	0	2.2	3	23	1	1	0	0	0	0	0	0	0	0
16	23	2	27	10	1	0.9	3.1	4.6	40.9	102.3	89.4	2	2.2	2.9	0	0	3	23	1	0	1	1	0	0	0	0	1	1
16	31	2	27	10	1	0.9	3.1	4.6	40.9	102.3	89.4	1	0.8	9.7	0	0	4	31	2	1	0	1	0	0	0	0	0	3
16	31	2	27	10	1	0.9	3.1	4.6	40.9	102.3	89.4	2	1.9	1.5	0	0	4	31	2	0	0	0	0	0	0	0	0	0
16	32	2	27	10	1	0.9	3.1	4.6	40.9	102.3	89.4	1	1.2	10.2	2.3	0	5	32	2	1	0	1	0	0	0	0	0	3
16	32	2	27	10	1	0.9	3.1	4.6	40.9	102.3	89.4	2	2	2	0	0	5	32	2	0	0	0	0	0	0	0	0	0
16	33	2	27	10	1	0.9	3.1	4.6	40.9	102.3	89.4	1	0.7	1.1	5.6	7.2	6	33	2	1	0	0	1	1	2	3	0	0
16	33	2	27	10	1	0.9	3.1	4.6	40.9	102.3	89.4	2	1.9	2	0	0	6	33	2	0	0	0	0	0	0	0	0	0
16	41	2	27	10	1	0.9	3.1	4.6	40.9	102.3	89.4	1	0.8	9.9	0	0	4	41	2	1	0	1	0	0	0	0	0	3
16	41	2	27	10	1	0.9	3.1	4.6	40.9	102.3	89.4	2	2.1	2.2	0	0	4	41	2	0	0	1	0	0	0	0	0	1
16	42	2	27	10	1	0.9	3.1	4.6	40.9	102.3	89.4	1	1.2	1.3	3.5	6.9	5	42	2	1	0	0	1	1	1	3	0	0
16	42	2	27	10	1	0.9	3.1	4.6	40.9	102.3	89.4	2	2	1.6	0	0	5	42	2	0	0	0	0	0	0	0	0	0
16	43	2	27	10	1	0.9	3.1	4.6	40.9	102.3	89.4	1	0.5	1	9.2	7.8	6	43	2	1	0	0	1	1	3	3	0	0
16	43	2	27	10	1	0.9	3.1	4.6	40.9	102.3	89.4	2	2.1	2.3	0	0	6	43	2	0	0	1	0	0	0	0	0	1
17	11	2	28	13	1	0.6	0.7	2.8	27.9	103.3	100.7	1	1.9	2	0	0	1	11	1	1	0	0	0	0	0	0	0	0
17	11	2	28	13	1	0.6	0.7	2.8	27.9	103.3	100.7	2	1.6	2	0	0	1	11	1	0	0	0	0	0	0	0	0	0
17	12	2	28	13	1	0.6	0.7	2.8	27.9	103.3	100.7	1	1.3	1.8	0	2.2	2	12	1	1	0	0	0	0	0	0	0	0
17	12	2	28	13	1	0.6	0.7	2.8	27.9	103.3	100.7	2	1.2	2.4	0	0	2	12	1	0	0	1	0	0	0	0	0	1
17	13	2	28	13	1	0.6	0.7	2.8	27.9	103.3	100.7	1	1.3	1.9	2	2.9	3	13	1	1	0	0	0	1	0	1	0	0
17	13	2	28	13	1	0.6	0.7	2.8	27.9	103.3	100.7	2	2.1	2.3	0	0	3	13	1	0	0	1	0	0	0	0	0	1
17	21	2	28	13	1	0.6	0.7	2.8	27.9	103.3	100.7	1	2.1	1.6	2.2	0	1	21	1	1	0	0	0	0	0	0	0	0
17	21	2	28	13	1	0.6	0.7	2.8	27.9	103.3	100.7	2	1	1.8	0	0	1	21	1	0	0	0	0	0	0	0	0	0
17	22	2	28	13	1	0.6	0.7	2.8	27.9	103.3	100.7	1	2	2	3.2	3.4	2	22	1	1	0	0	1	1	1	1	0	0
17	22	2	28	13	1	0.6	0.7	2.8	27.9	103.3	100.7	2	0.7	2	0	0	2	22	1	0	0	0	0	0	0	0	0	0
17	23	2	28	13	1	0.6	0.7	2.8	27.9	103.3	100.7	1	3	3.1	3.8	0	3	23	1	1	1	1	1	0	1	0	1	1
17	23	2	28	13	1	0.6	0.7	2.8	27.9	103.3	100.7	2	1.9	2.4	0	0	3	23	1	0	0	1	0	0	0	0	0	1
17	31	2	28	13	1	0.6	0.7	2.8	27.9	103.3	100.7	1	0.7	1.1	2	4	4	31	2	1	0	0	0	1	0	1	0	0
17	31	2	28	13	1	0.6	0.7	2.8	27.9	103.3	100.7	2	2.9	2.5	0	0	4	31	2	0	1	1	0	0	0	0	1	1
17	32	2	28	13	1	0.6	0.7	2.8	27.9	103.3	100.7	1	1.2	1	1.9	2.2	5	32	2	1	0	0	0	0	0	0	0	0
17	32	2	28	13	1	0.6	0.7	2.8	27.9	103.3	100.7	2	1.9	1.8	0	0	5	32	2	0	0	0	0	0	0	0	0	0
17	33	2	28	13	1	0.6	0.7	2.8	27.9	103.3	100.7	1	1.3	1	3.1	3.1	6	33	2	1	0	0	1	1	1	1	0	0
17	33	2	28	13	1	0.6	0.7	2.8	27.9	103.3	100.7	2	2.1	2.4	0	0	6	33	2	0	0	1	0	0	0	0	0	1
17	41	2	28	13	1	0.6	0.7	2.8	27.9	103.3	100.7	1	1.2	1.3	0	4.6	4	41	2	1	0	0	0	1	0	2	0	0
17	41	2	28	13	1	0.6	0.7	2.8	27.9	103.3	100.7	2	2.8	2.8	0	0	4	41	2	0	1	1	0	0	0	0	1	1
17	42	2	28	13	1	0.6	0.7	2.8	27.9	103.3	100.7	1	1.2	1.4	2.1	4.6	5	42	2	1	0	0	0	1	0	2	0	0
17	42	2	28	13	1	0.6	0.7	2.8	27.9	103.3	100.7	2	2.1	1.3	0	0	5	42	2	0	0	0	0	0	0	0	0	0
17	43	2	28	13	1	0.6	0.7	2.8	27.9	103.3	100.7	1	1.2	1.7	0	0	6	43	2	1	0	0	0	0	0	0	0	0
17	43	2	28	13	1	0.6	0.7	2.8	27.9	103.3	100.7	2	2.4	2.4	0	0	6	43	2	0	1	1	0	0	0	0	1	1
18	11	2	28	10	1	3.8	1.6	5.4	46.4	99.7	96.5	1	1.4	2	0	0	1	11	1	1	0	0	0	0	0	0	0	0
18	11	2	28	10	1	3.8	1.6	5.4	46.4	99.7	96.5	2	1.4	1.7	0	0	1	11	1	0	0	0	0	0	0	0	0	0
18	12	2	28	10	1	3.8	1.6	5.4	46.4	99.7	96.5	1	1.5	2	4.2	3.3	2	12	1	1	0	0	1	1	2	1	0	0
18	12	2	28	10	1	3.8	1.6	5.4	46.4	99.7	96.5	2	1.7	2.8	0	0	2	12	1	0	0	1	0	0	0	0	0	1
18	13	2	28	10	1	3.8	1.6	5.4	46.4	99.7	96.5	1	3.4	3.5	0	0	3	13	1	1	1	1	0	0	0	0	1	1
18	13	2	28	10	1	3.8	1.6	5.4	46.4	99.7	96.5	2	1.6	3.7	0	0	3	13	1	0	0	1	0	0	0	0	0	1
18	21	2	28	10	1	3.8	1.6	5.4	46.4	99.7	96.5	1	1.1	2.9	0	0	1	21	1	1	0	1	0	0	0	0	0	1
18	21	2	28	10	1	3.8	1.6	5.4	46.4	99.7	96.5	2	1.3	1.4	0	0	1	21	1	0	0	0	0	0	0	0	0	0
18	22	2	28	10	1	3.8	1.6	5.4	46.4	99.7	96.5	1	1.8	2.9	3.9	5.7	2	22	1	1	0	1	1	1	1	2	0	1
18	22	2	28	10	1	3.8	1.6	5.4	46.4	99.7	96.5	2	1.7	1.7	0	0	2	22	1	0	0	0	0	0	0	0	0	0
18	23	2	28	10	1	3.8	1.6	5.4	46.4	99.7	96.5	1	4.3	3.4	0	4.2	3	23	1	1	1	1	0	1	0	2	2	1
18	23	2	28	10	1	3.8	1.6	5.4	46.4	99.7	96.5	2	2	2.9	0	0	3	23	1	0	0	1	0	0	0	0	0	1
18	31	2	28	10	1	3.8	1.6	5.4	46.4	99.7	96.5	1	2.1	8.5	2.2	0	4	31	2	1	0	1	0	0	0	0	0	3
18	31	2	28	10	1	3.8	1.6	5.4	46.4	99.7	96.5	2	2.4	2.8	0	0	4	31	2	0	1	1	0	0	0	0	1	1
18	32	2	28	10	1	3.8	1.6	5.4	46.4	99.7	96.5	1	2.4	9	2.2	0	5	32	2	1	1	1	0	0	0	0	1	3
18	32	2	28	10	1	3.8	1.6	5.4	46.4	99.7	96.5	2	3.3	2.5	0	0	5	32	2	0	1	1	0	0	0	0	1	1
18	33	2	28	10	1	3.8	1.6	5.4	46.4	99.7	96.5	1	2.4	2.9	0	0	6	33	2	1	1	1	0	0	0	0	1	1
18	33	2	28	10	1	3.8	1.6	5.4	46.4	99.7	96.5	2	1.4	2.4	0	0	6	33	2	0	0	1	0	0	0	0	0	1
18	41	2	28	10	1	3.8	1.6	5.4	46.4	99.7	96.5	1	3.7	8	0	0	4	41	2	1	1	1	0	0	0	0	1	3
18	41	2	28	10	1	3.8	1.6	5.4	46.4	99.7	96.5	2	3	1.6	0	0	4	41	2	0	1	0	0	0	0	0	1	0
18	42	2	28	10	1	3.8	1.6	5.4	46.4	99.7	96.5	1	0.9	8.8	1.9	0	5	42	2	1	0	1	0	0	0	0	0	3
18	42	2	28	10	1	3.8	1.6	5.4	46.4	99.7	96.5	2	2.3	2.1	0	0	5	42	2	0	1	0	0	0	0	0	1	0
18	43	2	28	10	1	3.8	1.6	5.4	46.4	99.7	96.5	1	2.1	3.2	2	0	6	43	2	1	0	1	0	0	0	0	0	1
18	43	2	28	10	1	3.8	1.6	5.4	46.4	99.7	96.5	2	1.8	3.7	0	0	6	43	2	0	0	1	0	0	0	0	0	1
19	11	2	26	9.5	1	0	2.1	5.9	29.8	87.5	87.9	1	1.5	1.5	0	0	1	11	1	1	0	0	0	0	0	0	0	0
19	11	2	26	9.5	1	0	2.1	5.9	29.8	87.5	87.9	2	0.6	1.2	0	0	1	11	1	0	0	0	0	0	0	0	0	0
19	12	2	26	9.5	1	0	2.1	5.9	29.8	87.5	87.9	1	1.4	2	5.3	0	2	12	1	1	0	0	1	0	2	0	0	0
19	12	2	26	9.5	1	0	2.1	5.9	29.8	87.5	87.9	2	0.9	1.6	0	0	2	12	1	0	0	0	0	0	0	0	0	0
19	13	2	26	9.5	1	0	2.1	5.9	29.8	87.5	87.9	1	1.5	2.4	5.5	0	3	13	1	1	0	1	1	0	2	0	0	1
19	13	2	26	9.5	1	0	2.1	5.9	29.8	87.5	87.9	2	0.9	1.4	0	0	3	13	1	0	0	0	0	0	0	0	0	0
19	21	2	26	9.5	1	0	2.1	5.9	29.8	87.5	87.9	1	1	1.8	0	0	1	21	1	1	0	0	0	0	0	0	0	0
19	21	2	26	9.5	1	0	2.1	5.9	29.8	87.5	87.9	2	0.8	0.5	0	0	1	21	1	0	0	0	0	0	0	0	0	0
19	22	2	26	9.5	1	0	2.1	5.9	29.8	87.5	87.9	1	1.3	1	2	2.2	2	22	1	1	0	0	0	0	0	0	0	0
19	22	2	26	9.5	1	0	2.1	5.9	29.8	87.5	87.9	2	0.7	1.4	0	0	2	22	1	0	0	0	0	0	0	0	0	0
19	23	2	26	9.5	1	0	2.1	5.9	29.8	87.5	87.9	1	1.1	1.8	6.3	5.5	3	23	1	1	0	0	1	1	3	2	0	0
19	23	2	26	9.5	1	0	2.1	5.9	29.8	87.5	87.9	2	1.3	0.9	0	0	3	23	1	0	0	0	0	0	0	0	0	0
19	31	2	26	9.5	1	0	2.1	5.9	29.8	87.5	87.9	1	0.9	0.6	0	2.2	4	31	2	1	0	0	0	0	0	0	0	0
19	31	2	26	9.5	1	0	2.1	5.9	29.8	87.5	87.9	2	1.4	2	0	0	4	31	2	0	0	0	0	0	0	0	0	0
19	32	2	26	9.5	1	0	2.1	5.9	29.8	87.5	87.9	1	0	6.8	4.3	0	5	32	2	1	0	1	1	0	2	0	0	3
19	32	2	26	9.5	1	0	2.1	5.9	29.8	87.5	87.9	2	1.7	2	0	0	5	32	2	0	0	0	0	0	0	0	0	0
19	33	2	26	9.5	1	0	2.1	5.9	29.8	87.5	87.9	1	0	0	3.7	4.1	6	33	2	1	0	0	1	1	1	1	0	0
19	33	2	26	9.5	1	0	2.1	5.9	29.8	87.5	87.9	2	1.7	2.1	0	0	6	33	2	0	0	0	0	0	0	0	0	0
19	41	2	26	9.5	1	0	2.1	5.9	29.8	87.5	87.9	1	0	0.6	1.4	0	4	41	2	1	0	0	0	0	0	0	0	0
19	41	2	26	9.5	1	0	2.1	5.9	29.8	87.5	87.9	2	1.8	1.6	0	0	4	41	2	0	0	0	0	0	0	0	0	0
19	42	2	26	9.5	1	0	2.1	5.9	29.8	87.5	87.9	1	3.6	6.1	0	0	5	42	2	1	1	1	0	0	0	0	1	3
19	42	2	26	9.5	1	0	2.1	5.9	29.8	87.5	87.9	2	1.8	2	0	0	5	42	2	0	0	0	0	0	0	0	0	0
19	43	2	26	9.5	1	0	2.1	5.9	29.8	87.5	87.9	1	0.8	1.2	2.5	3.2	6	43	2	1	0	0	1	1	1	1	0	0
19	43	2	26	9.5	1	0	2.1	5.9	29.8	87.5	87.9	2	1.1	1.2	0	0	6	43	2	0	0	0	0	0	0	0	0	0
20	11	2	23	11	1	0.7	2.4	5.7	43.8	103.9	93	1	14.3	3.4	0	4	1	11	1	1	1	1	0	1	0	1	3	1
20	11	2	23	11	1	0.7	2.4	5.7	43.8	103.9	93	2	1.7	3	0	0	1	11	1	0	0	1	0	0	0	0	0	1
20	12	2	23	11	1	0.7	2.4	5.7	43.8	103.9	93	1	2.7	6.9	0	0	2	12	1	1	1	1	0	0	0	0	1	3
20	12	2	23	11	1	0.7	2.4	5.7	43.8	103.9	93	2	1.4	2.4	0	0	2	12	1	0	0	1	0	0	0	0	0	1
20	13	2	23	11	1	0.7	2.4	5.7	43.8	103.9	93	1	3.4	3.1	0	5.9	3	13	1	1	1	1	0	1	0	2	1	1
20	13	2	23	11	1	0.7	2.4	5.7	43.8	103.9	93	2	2.6	2.2	0	0	3	13	1	0	1	1	0	0	0	0	1	1
20	21	2	23	11	1	0.7	2.4	5.7	43.8	103.9	93	1	2.6	3.2	0	0	1	21	1	1	1	1	0	0	0	0	1	1
20	21	2	23	11	1	0.7	2.4	5.7	43.8	103.9	93	2	2.5	2.5	0	0	1	21	1	0	1	1	0	0	0	0	1	1
20	22	2	23	11	1	0.7	2.4	5.7	43.8	103.9	93	1	3.3	4.5	0	0	2	22	1	1	1	1	0	0	0	0	1	2
20	22	2	23	11	1	0.7	2.4	5.7	43.8	103.9	93	2	1.7	2.3	0	0	2	22	1	0	0	1	0	0	0	0	0	1
20	23	2	23	11	1	0.7	2.4	5.7	43.8	103.9	93	1	2.5	3.7	0	7.8	3	23	1	1	1	1	0	1	0	3	1	1
20	23	2	23	11	1	0.7	2.4	5.7	43.8	103.9	93	2	1.4	3.3	0	0	3	23	1	0	0	1	0	0	0	0	0	1
20	31	2	23	11	1	0.7	2.4	5.7	43.8	103.9	93	1	12.3	2.3	0	0	4	31	2	1	1	1	0	0	0	0	3	1
20	31	2	23	11	1	0.7	2.4	5.7	43.8	103.9	93	2	2.2	3.2	0	0	4	31	2	0	1	1	0	0	0	0	1	1
20	32	2	23	11	1	0.7	2.4	5.7	43.8	103.9	93	1	2.4	2.8	0	3.2	5	32	2	1	1	1	0	1	0	1	1	1
20	32	2	23	11	1	0.7	2.4	5.7	43.8	103.9	93	2	3.7	3.4	0	0	5	32	2	0	1	1	0	0	0	0	1	1
20	33	2	23	11	1	0.7	2.4	5.7	43.8	103.9	93	1	9.9	8	0	0	6	33	2	1	1	1	0	0	0	0	3	3
20	33	2	23	11	1	0.7	2.4	5.7	43.8	103.9	93	2	3.3	2.5	0	0	6	33	2	0	1	1	0	0	0	0	1	1
20	41	2	23	11	1	0.7	2.4	5.7	43.8	103.9	93	1	2.3	2.2	0	0	4	41	2	1	1	1	0	0	0	0	1	1
20	41	2	23	11	1	0.7	2.4	5.7	43.8	103.9	93	2	4.3	2.5	0	0	4	41	2	0	1	1	0	0	0	0	2	1
20	42	2	23	11	1	0.7	2.4	5.7	43.8	103.9	93	1	1.9	2.1	3.2	2.6	5	42	2	1	0	0	1	1	1	1	0	0
20	42	2	23	11	1	0.7	2.4	5.7	43.8	103.9	93	2	2.5	2.6	0	0	5	42	2	0	1	1	0	0	0	0	1	1
20	43	2	23	11	1	0.7	2.4	5.7	43.8	103.9	93	1	11.7	2.5	0	0	6	43	2	1	1	1	0	0	0	0	3	1
20	43	2	23	11	1	0.7	2.4	5.7	43.8	103.9	93	2	2.1	2.6	0	0	6	43	2	0	0	1	0	0	0	0	0	1
21	11	2	33	13	1	0.7	0.5	3.8	31.7	92.4	96.7	1	1.7	1.7	0	0	1	11	1	1	0	0	0	0	0	0	0	0
21	11	2	33	13	1	0.7	0.5	3.8	31.7	92.4	96.7	2	1.7	1.7	0	0	1	11	1	0	0	0	0	0	0	0	0	0
21	12	2	33	13	1	0.7	0.5	3.8	31.7	92.4	96.7	1	10.6	11.7	0	0	2	12	1	1	1	1	0	0	0	0	3	3
21	12	2	33	13	1	0.7	0.5	3.8	31.7	92.4	96.7	2	1.5	1	0	0	2	12	1	0	0	0	0	0	0	0	0	0
21	13	2	33	13	1	0.7	0.5	3.8	31.7	92.4	96.7	1	2	2.7	8.1	8.6	3	13	1	1	0	1	1	1	3	3	0	1
21	13	2	33	13	1	0.7	0.5	3.8	31.7	92.4	96.7	2	2.2	2.2	0	0	3	13	1	0	1	1	0	0	0	0	1	1
21	21	2	33	13	1	0.7	0.5	3.8	31.7	92.4	96.7	1	1.5	2.1	0	0	1	21	1	1	0	0	0	0	0	0	0	0
21	21	2	33	13	1	0.7	0.5	3.8	31.7	92.4	96.7	2	1.5	2	0	0	1	21	1	0	0	0	0	0	0	0	0	0
21	22	2	33	13	1	0.7	0.5	3.8	31.7	92.4	96.7	1	11.6	11.6	0	0	2	22	1	1	1	1	0	0	0	0	3	3
21	22	2	33	13	1	0.7	0.5	3.8	31.7	92.4	96.7	2	1.7	2.2	0	0	2	22	1	0	0	1	0	0	0	0	0	1
21	23	2	33	13	1	0.7	0.5	3.8	31.7	92.4	96.7	1	1.7	2.3	3.6	3.6	3	23	1	1	0	1	1	1	1	1	0	1
21	23	2	33	13	1	0.7	0.5	3.8	31.7	92.4	96.7	2	3.3	3.3	0	0	3	23	1	0	1	1	0	0	0	0	1	1
21	31	2	33	13	1	0.7	0.5	3.8	31.7	92.4	96.7	1	6.2	6.2	0	0	4	31	2	1	1	1	0	0	0	0	3	3
21	31	2	33	13	1	0.7	0.5	3.8	31.7	92.4	96.7	2	1.5	1.7	0	0	4	31	2	0	0	0	0	0	0	0	0	0
21	32	2	33	13	1	0.7	0.5	3.8	31.7	92.4	96.7	1	8	7.1	0	0	5	32	2	1	1	1	0	0	0	0	3	3
21	32	2	33	13	1	0.7	0.5	3.8	31.7	92.4	96.7	2	0.7	1.4	0	0	5	32	2	0	0	0	0	0	0	0	0	0
21	33	2	33	13	1	0.7	0.5	3.8	31.7	92.4	96.7	1	8.4	1.2	0	5.1	6	33	2	1	1	0	0	1	0	2	3	0
21	33	2	33	13	1	0.7	0.5	3.8	31.7	92.4	96.7	2	1.1	1.4	0	0	6	33	2	0	0	0	0	0	0	0	0	0
21	41	2	33	13	1	0.7	0.5	3.8	31.7	92.4	96.7	1	6	7	0	0	4	41	2	1	1	1	0	0	0	0	2	3
21	41	2	33	13	1	0.7	0.5	3.8	31.7	92.4	96.7	2	1.1	2.1	0	0	4	41	2	0	0	0	0	0	0	0	0	0
21	42	2	33	13	1	0.7	0.5	3.8	31.7	92.4	96.7	1	0.8	8.8	0	0	5	42	2	1	0	1	0	0	0	0	0	3
21	42	2	33	13	1	0.7	0.5	3.8	31.7	92.4	96.7	2	0.7	1.7	0	0	5	42	2	0	0	0	0	0	0	0	0	0
21	43	2	33	13	1	0.7	0.5	3.8	31.7	92.4	96.7	1	1	1.8	0	2.7	6	43	2	1	0	0	0	1	0	1	0	0
21	43	2	33	13	1	0.7	0.5	3.8	31.7	92.4	96.7	2	1.2	2	0	0	6	43	2	0	0	0	0	0	0	0	0	0
22	11	1	26	16	1	1	3.5	4.1	33.4	100.2	100.2	1	1.5	1.1	3.1	2.2	1	11	1	1	0	0	1	0	1	0	0	0
22	11	1	26	16	1	1	3.5	4.1	33.4	100.2	100.2	2	1.3	2.3	0	0	1	11	1	0	0	1	0	0	0	0	0	1
22	12	1	26	16	1	1	3.5	4.1	33.4	100.2	100.2	1	1.3	2.6	0	2.2	2	12	1	1	0	1	0	0	0	0	0	1
22	12	1	26	16	1	1	3.5	4.1	33.4	100.2	100.2	2	1.7	1.5	0	0	2	12	1	0	0	0	0	0	0	0	0	0
22	13	1	26	16	1	1	3.5	4.1	33.4	100.2	100.2	1	2	2.5	0	6.2	3	13	1	1	0	1	0	1	0	3	0	1
22	13	1	26	16	1	1	3.5	4.1	33.4	100.2	100.2	2	1.3	2.8	0	0	3	13	1	0	0	1	0	0	0	0	0	1
22	21	1	26	16	1	1	3.5	4.1	33.4	100.2	100.2	1	1.6	2	0	0	1	21	1	1	0	0	0	0	0	0	0	0
22	21	1	26	16	1	1	3.5	4.1	33.4	100.2	100.2	2	1.4	2.8	0	0	1	21	1	0	0	1	0	0	0	0	0	1
22	22	1	26	16	1	1	3.5	4.1	33.4	100.2	100.2	1	1.6	2.3	0	2.2	2	22	1	1	0	1	0	0	0	0	0	1
22	22	1	26	16	1	1	3.5	4.1	33.4	100.2	100.2	2	1.9	1.8	0	0	2	22	1	0	0	0	0	0	0	0	0	0
22	23	1	26	16	1	1	3.5	4.1	33.4	100.2	100.2	1	1.9	3	8.6	6.5	3	23	1	1	0	1	1	1	3	3	0	1
22	23	1	26	16	1	1	3.5	4.1	33.4	100.2	100.2	2	1.9	3.5	0	0	3	23	1	0	0	1	0	0	0	0	0	1
22	31	1	26	16	1	1	3.5	4.1	33.4	100.2	100.2	1	2.6	2	0	0	4	31	2	1	1	0	0	0	0	0	1	0
22	31	1	26	16	1	1	3.5	4.1	33.4	100.2	100.2	2	2.6	3.2	0	0	4	31	2	0	1	1	0	0	0	0	1	1
22	32	1	26	16	1	1	3.5	4.1	33.4	100.2	100.2	1	2.3	2.4	0	0	5	32	2	1	1	1	0	0	0	0	1	1
22	32	1	26	16	1	1	3.5	4.1	33.4	100.2	100.2	2	2.5	3	0	0	5	32	2	0	1	1	0	0	0	0	1	1
22	33	1	26	16	1	1	3.5	4.1	33.4	100.2	100.2	1	7.6	10.5	0	0	6	33	2	1	1	1	0	0	0	0	3	3
22	33	1	26	16	1	1	3.5	4.1	33.4	100.2	100.2	2	2.5	3	0	0	6	33	2	0	1	1	0	0	0	0	1	1
22	41	1	26	16	1	1	3.5	4.1	33.4	100.2	100.2	1	2	0.9	0	2.9	4	41	2	1	0	0	0	1	0	1	0	0
22	41	1	26	16	1	1	3.5	4.1	33.4	100.2	100.2	2	2.8	2.7	0	0	4	41	2	0	1	1	0	0	0	0	1	1
22	42	1	26	16	1	1	3.5	4.1	33.4	100.2	100.2	1	1.4	0.9	0	3.2	5	42	2	1	0	0	0	1	0	1	0	0
22	42	1	26	16	1	1	3.5	4.1	33.4	100.2	100.2	2	3.4	2	0	0	5	42	2	0	1	0	0	0	0	0	1	0
22	43	1	26	16	1	1	3.5	4.1	33.4	100.2	100.2	1	2.7	2	0	0	6	43	2	1	1	0	0	0	0	0	1	0
22	43	1	26	16	1	1	3.5	4.1	33.4	100.2	100.2	2	2.6	2.7	0	0	6	43	2	0	1	1	0	0	0	0	1	1
23	11	2	21	14	1	0.5	1.2	7.2	33.7	101.4	113.9	1	1.7	2.1	0	0	1	11	1	1	0	0	0	0	0	0	0	0
23	11	2	21	14	1	0.5	1.2	7.2	33.7	101.4	113.9	2	1.4	2.4	0	0	1	11	1	0	0	1	0	0	0	0	0	1
23	12	2	21	14	1	0.5	1.2	7.2	33.7	101.4	113.9	1	1.9	2	0	0	2	12	1	1	0	0	0	0	0	0	0	0
23	12	2	21	14	1	0.5	1.2	7.2	33.7	101.4	113.9	2	1	2.2	0	0	2	12	1	0	0	1	0	0	0	0	0	1
23	13	2	21	14	1	0.5	1.2	7.2	33.7	101.4	113.9	1	1.2	1.2	0	0	3	13	1	1	0	0	0	0	0	0	0	0
23	13	2	21	14	1	0.5	1.2	7.2	33.7	101.4	113.9	2	1.1	1.5	0	2.3	3	13	1	0	0	0	0	0	0	0	0	0
23	21	2	21	14	1	0.5	1.2	7.2	33.7	101.4	113.9	1	1.6	1.6	0	0	1	21	1	1	0	0	0	0	0	0	0	0
23	21	2	21	14	1	0.5	1.2	7.2	33.7	101.4	113.9	2	1.9	2.4	0	0	1	21	1	0	0	1	0	0	0	0	0	1
23	22	2	21	14	1	0.5	1.2	7.2	33.7	101.4	113.9	1	1.9	1.8	0	0	2	22	1	1	0	0	0	0	0	0	0	0
23	22	2	21	14	1	0.5	1.2	7.2	33.7	101.4	113.9	2	1.2	1.9	0	0	2	22	1	0	0	0	0	0	0	0	0	0
23	23	2	21	14	1	0.5	1.2	7.2	33.7	101.4	113.9	1	1.4	1.5	0	0	3	23	1	1	0	0	0	0	0	0	0	0
23	23	2	21	14	1	0.5	1.2	7.2	33.7	101.4	113.9	2	1.5	1.5	0	0	3	23	1	0	0	0	0	0	0	0	0	0
23	31	2	21	14	1	0.5	1.2	7.2	33.7	101.4	113.9	1	1.9	2.4	0	0	4	31	2	1	0	1	0	0	0	0	0	1
23	31	2	21	14	1	0.5	1.2	7.2	33.7	101.4	113.9	2	2.7	2.5	0	0	4	31	2	0	1	1	0	0	0	0	1	1
23	32	2	21	14	1	0.5	1.2	7.2	33.7	101.4	113.9	1	1.8	2	0	0	5	32	2	1	0	0	0	0	0	0	0	0
23	32	2	21	14	1	0.5	1.2	7.2	33.7	101.4	113.9	2	1.9	2.5	0	0	5	32	2	0	0	1	0	0	0	0	0	1
23	33	2	21	14	1	0.5	1.2	7.2	33.7	101.4	113.9	1	1.5	6.9	0	0	6	33	2	1	0	1	0	0	0	0	0	3
23	33	2	21	14	1	0.5	1.2	7.2	33.7	101.4	113.9	2	2.6	2.5	0	0	6	33	2	0	1	1	0	0	0	0	1	1
23	41	2	21	14	1	0.5	1.2	7.2	33.7	101.4	113.9	1	1.9	1.7	0	0	4	41	2	1	0	0	0	0	0	0	0	0
23	41	2	21	14	1	0.5	1.2	7.2	33.7	101.4	113.9	2	2.4	2.3	0	0	4	41	2	0	1	1	0	0	0	0	1	1
23	42	2	21	14	1	0.5	1.2	7.2	33.7	101.4	113.9	1	2.2	3.6	0	0	5	42	2	1	1	1	0	0	0	0	1	1
23	42	2	21	14	1	0.5	1.2	7.2	33.7	101.4	113.9	2	1.9	2.5	0	0	5	42	2	0	0	1	0	0	0	0	0	1
23	43	2	21	14	1	0.5	1.2	7.2	33.7	101.4	113.9	1	1.4	1.8	0	0	6	43	2	1	0	0	0	0	0	0	0	0
23	43	2	21	14	1	0.5	1.2	7.2	33.7	101.4	113.9	2	1.9	2.5	0	0	6	43	2	0	0	1	0	0	0	0	0	1
24	11	2	24	14	1	2.5	3.1	2.7	30.2	110.1	94.2	1	2.7	2.5	0	0	1	11	1	1	1	1	0	0	0	0	1	1
24	11	2	24	14	1	2.5	3.1	2.7	30.2	110.1	94.2	2	1.6	1.7	0	0	1	11	1	0	0	0	0	0	0	0	0	0
24	12	2	24	14	1	2.5	3.1	2.7	30.2	110.1	94.2	1	3.5	4.1	0	2.5	2	12	1	1	1	1	0	1	0	1	1	2
24	12	2	24	14	1	2.5	3.1	2.7	30.2	110.1	94.2	2	1.5	2	0	0	2	12	1	0	0	0	0	0	0	0	0	0
24	13	2	24	14	1	2.5	3.1	2.7	30.2	110.1	94.2	1	1.8	2.2	0	0	3	13	1	1	0	1	0	0	0	0	0	1
24	13	2	24	14	1	2.5	3.1	2.7	30.2	110.1	94.2	2	1.9	2	0	0	3	13	1	0	0	0	0	0	0	0	0	0
24	21	2	24	14	1	2.5	3.1	2.7	30.2	110.1	94.2	1	2.6	2.7	0	0	1	21	1	1	1	1	0	0	0	0	1	1
24	21	2	24	14	1	2.5	3.1	2.7	30.2	110.1	94.2	2	1.5	1.5	0	0	1	21	1	0	0	0	0	0	0	0	0	0
24	22	2	24	14	1	2.5	3.1	2.7	30.2	110.1	94.2	1	2.3	2.7	0	0	2	22	1	1	1	1	0	0	0	0	1	1
24	22	2	24	14	1	2.5	3.1	2.7	30.2	110.1	94.2	2	2.6	2.4	0	0	2	22	1	0	1	1	0	0	0	0	1	1
24	23	2	24	14	1	2.5	3.1	2.7	30.2	110.1	94.2	1	2	2.8	0	2.4	3	23	1	1	0	1	0	1	0	1	0	1
24	23	2	24	14	1	2.5	3.1	2.7	30.2	110.1	94.2	2	1	1.4	0	0	3	23	1	0	0	0	0	0	0	0	0	0
24	31	2	24	14	1	2.5	3.1	2.7	30.2	110.1	94.2	1	2.9	2.9	0	4.7	4	31	2	1	1	1	0	1	0	2	1	1
24	31	2	24	14	1	2.5	3.1	2.7	30.2	110.1	94.2	2	2.5	1.7	0	0	4	31	2	0	1	0	0	0	0	0	1	0
24	32	2	24	14	1	2.5	3.1	2.7	30.2	110.1	94.2	1	2.9	3.2	3	3.2	5	32	2	1	1	1	1	1	1	1	1	1
24	32	2	24	14	1	2.5	3.1	2.7	30.2	110.1	94.2	2	1.5	1.8	0	0	5	32	2	0	0	0	0	0	0	0	0	0
24	33	2	24	14	1	2.5	3.1	2.7	30.2	110.1	94.2	1	2.1	2.2	4	5.8	6	33	2	1	0	1	1	1	1	2	0	1
24	33	2	24	14	1	2.5	3.1	2.7	30.2	110.1	94.2	2	2	2.7	0	0	6	33	2	0	0	1	0	0	0	0	0	1
24	41	2	24	14	1	2.5	3.1	2.7	30.2	110.1	94.2	1	2.5	10	0	0	4	41	2	1	1	1	0	0	0	0	1	3
24	41	2	24	14	1	2.5	3.1	2.7	30.2	110.1	94.2	2	2.5	1.9	0	0	4	41	2	0	1	0	0	0	0	0	1	0
24	42	2	24	14	1	2.5	3.1	2.7	30.2	110.1	94.2	1	2.9	9.8	3.1	0	5	42	2	1	1	1	1	0	1	0	1	3
24	42	2	24	14	1	2.5	3.1	2.7	30.2	110.1	94.2	2	2.3	1.4	0	0	5	42	2	0	1	0	0	0	0	0	1	0
24	43	2	24	14	1	2.5	3.1	2.7	30.2	110.1	94.2	1	7.8	8.4	0	0	6	43	2	1	1	1	0	0	0	0	3	3
24	43	2	24	14	1	2.5	3.1	2.7	30.2	110.1	94.2	2	2	2.2	0	0	6	43	2	0	0	1	0	0	0	0	0	1
25	11	2	23	11	1	0.6	0.1	2.3	38.1	102.2	93.4	1	1.3	1	0	0	1	11	1	1	0	0	0	0	0	0	0	0
25	11	2	23	11	1	0.6	0.1	2.3	38.1	102.2	93.4	2	1.5	2.4	0	0	1	11	1	0	0	1	0	0	0	0	0	1
25	12	2	23	11	1	0.6	0.1	2.3	38.1	102.2	93.4	1	1.2	2	0	0	2	12	1	1	0	0	0	0	0	0	0	0
25	12	2	23	11	1	0.6	0.1	2.3	38.1	102.2	93.4	2	0.7	2.3	0	0	2	12	1	0	0	1	0	0	0	0	0	1
25	13	2	23	11	1	0.6	0.1	2.3	38.1	102.2	93.4	1	1	1.1	0	8.2	3	13	1	1	0	0	0	1	0	3	0	0
25	13	2	23	11	1	0.6	0.1	2.3	38.1	102.2	93.4	2	0	2.2	0	0	3	13	1	0	0	1	0	0	0	0	0	1
25	21	2	23	11	1	0.6	0.1	2.3	38.1	102.2	93.4	1	1.5	1.3	0	0	1	21	1	1	0	0	0	0	0	0	0	0
25	21	2	23	11	1	0.6	0.1	2.3	38.1	102.2	93.4	2	1.7	1.8	0	0	1	21	1	0	0	0	0	0	0	0	0	0
25	22	2	23	11	1	0.6	0.1	2.3	38.1	102.2	93.4	1	2	1.3	3.1	3.4	2	22	1	1	0	0	1	1	1	1	0	0
25	22	2	23	11	1	0.6	0.1	2.3	38.1	102.2	93.4	2	1.6	6.1	0	0	2	22	1	0	0	1	0	0	0	0	0	3
25	23	2	23	11	1	0.6	0.1	2.3	38.1	102.2	93.4	1	1.7	2.2	0	2.1	3	23	1	1	0	1	0	0	0	0	0	1
25	23	2	23	11	1	0.6	0.1	2.3	38.1	102.2	93.4	2	0	1.8	0	0	3	23	1	0	0	0	0	0	0	0	0	0
25	31	2	23	11	1	0.6	0.1	2.3	38.1	102.2	93.4	1	7.5	8.6	0	0	4	31	2	1	1	1	0	0	0	0	3	3
25	31	2	23	11	1	0.6	0.1	2.3	38.1	102.2	93.4	2	1.2	1.3	0	0	4	31	2	0	0	0	0	0	0	0	0	0
25	32	2	23	11	1	0.6	0.1	2.3	38.1	102.2	93.4	1	9.7	9.7	0	0	5	32	2	1	1	1	0	0	0	0	3	3
25	32	2	23	11	1	0.6	0.1	2.3	38.1	102.2	93.4	2	1.4	1.7	0	0	5	32	2	0	0	0	0	0	0	0	0	0
25	33	2	23	11	1	0.6	0.1	2.3	38.1	102.2	93.4	1	7.7	2.1	0	0	6	33	2	1	1	0	0	0	0	0	3	0
25	33	2	23	11	1	0.6	0.1	2.3	38.1	102.2	93.4	2	1.4	1.7	0	0	6	33	2	0	0	0	0	0	0	0	0	0
25	41	2	23	11	1	0.6	0.1	2.3	38.1	102.2	93.4	1	1.5	9.4	1.8	0	4	41	2	1	0	1	0	0	0	0	0	3
25	41	2	23	11	1	0.6	0.1	2.3	38.1	102.2	93.4	2	1	1.2	0	0	4	41	2	0	0	0	0	0	0	0	0	0
25	42	2	23	11	1	0.6	0.1	2.3	38.1	102.2	93.4	1	6.9	7.7	0	0	5	42	2	1	1	1	0	0	0	0	3	3
25	42	2	23	11	1	0.6	0.1	2.3	38.1	102.2	93.4	2	1.3	1.4	0	0	5	42	2	0	0	0	0	0	0	0	0	0
25	43	2	23	11	1	0.6	0.1	2.3	38.1	102.2	93.4	1	1.2	1.2	3.4	0	6	43	2	1	0	0	1	0	1	0	0	0
25	43	2	23	11	1	0.6	0.1	2.3	38.1	102.2	93.4	2	0.5	1.6	0	0	6	43	2	0	0	0	0	0	0	0	0	0
26	11	1	19	10	1	0.3	0.7	2	23.9	111.5	94.3	1	1.1	1.3	0	0	1	11	1	1	0	0	0	0	0	0	0	0
26	11	1	19	10	1	0.3	0.7	2	23.9	111.5	94.3	2	1.4	1.4	0	0	1	11	1	0	0	0	0	0	0	0	0	0
26	12	1	19	10	1	0.3	0.7	2	23.9	111.5	94.3	1	1.7	2.8	0	0	2	12	1	1	0	1	0	0	0	0	0	1
26	12	1	19	10	1	0.3	0.7	2	23.9	111.5	94.3	2	1	2	0	0	2	12	1	0	0	0	0	0	0	0	0	0
26	13	1	19	10	1	0.3	0.7	2	23.9	111.5	94.3	1	1.2	1.2	0	0	3	13	1	1	0	0	0	0	0	0	0	0
26	13	1	19	10	1	0.3	0.7	2	23.9	111.5	94.3	2	2.5	1.2	0	0	3	13	1	0	1	0	0	0	0	0	1	0
26	21	1	19	10	1	0.3	0.7	2	23.9	111.5	94.3	1	1.7	0.8	0	0	1	21	1	1	0	0	0	0	0	0	0	0
26	21	1	19	10	1	0.3	0.7	2	23.9	111.5	94.3	2	1.1	1.6	0	0	1	21	1	0	0	0	0	0	0	0	0	0
26	22	1	19	10	1	0.3	0.7	2	23.9	111.5	94.3	1	2	1.9	0	0	2	22	1	1	0	0	0	0	0	0	0	0
26	22	1	19	10	1	0.3	0.7	2	23.9	111.5	94.3	2	1.5	0.8	0	0	2	22	1	0	0	0	0	0	0	0	0	0
26	23	1	19	10	1	0.3	0.7	2	23.9	111.5	94.3	1	2	2	0	0	3	23	1	1	0	0	0	0	0	0	0	0
26	23	1	19	10	1	0.3	0.7	2	23.9	111.5	94.3	2	1.8	1.5	0	0	3	23	1	0	0	0	0	0	0	0	0	0
26	31	1	19	10	1	0.3	0.7	2	23.9	111.5	94.3	1	1.8	1.4	0	0	4	31	2	1	0	0	0	0	0	0	0	0
26	31	1	19	10	1	0.3	0.7	2	23.9	111.5	94.3	2	1.9	2.2	0	0	4	31	2	0	0	1	0	0	0	0	0	1
26	32	1	19	10	1	0.3	0.7	2	23.9	111.5	94.3	1	6.7	7.6	0	0	5	32	2	1	1	1	0	0	0	0	3	3
26	32	1	19	10	1	0.3	0.7	2	23.9	111.5	94.3	2	1.9	1.1	0	0	5	32	2	0	0	0	0	0	0	0	0	0
26	33	1	19	10	1	0.3	0.7	2	23.9	111.5	94.3	1	0.8	1.5	0	0	6	33	2	1	0	0	0	0	0	0	0	0
26	33	1	19	10	1	0.3	0.7	2	23.9	111.5	94.3	2	1.7	2	0	0	6	33	2	0	0	0	0	0	0	0	0	0
26	41	1	19	10	1	0.3	0.7	2	23.9	111.5	94.3	1	0.9	1.3	0	0	4	41	2	1	0	0	0	0	0	0	0	0
26	41	1	19	10	1	0.3	0.7	2	23.9	111.5	94.3	2	1.6	2.4	0	0	4	41	2	0	0	1	0	0	0	0	0	1
26	42	1	19	10	1	0.3	0.7	2	23.9	111.5	94.3	1	1.5	1.5	2.4	0	5	42	2	1	0	0	1	0	1	0	0	0
26	42	1	19	10	1	0.3	0.7	2	23.9	111.5	94.3	2	1.9	1.8	0	0	5	42	2	0	0	0	0	0	0	0	0	0
26	43	1	19	10	1	0.3	0.7	2	23.9	111.5	94.3	1	1.4	2	0	0	6	43	2	1	0	0	0	0	0	0	0	0
26	43	1	19	10	1	0.3	0.7	2	23.9	111.5	94.3	2	1.9	1.5	0	0	6	43	2	0	0	0	0	0	0	0	0	0
27	11	2	33	13	1	1	0.6	5.3	23.8	107.8	103.9	1	2.6	2	0	0	1	11	1	1	1	0	0	0	0	0	1	0
27	11	2	33	13	1	1	0.6	5.3	23.8	107.8	103.9	2	1.6	1.2	0	0	1	11	1	0	0	0	0	0	0	0	0	0
27	12	2	33	13	1	1	0.6	5.3	23.8	107.8	103.9	1	2.4	2.7	0	0	2	12	1	1	1	1	0	0	0	0	1	1
27	12	2	33	13	1	1	0.6	5.3	23.8	107.8	103.9	2	1.6	1.9	0	0	2	12	1	0	0	0	0	0	0	0	0	0
27	13	2	33	13	1	1	0.6	5.3	23.8	107.8	103.9	1	1.6	4.2	0	0	3	13	1	1	0	1	0	0	0	0	0	2
27	13	2	33	13	1	1	0.6	5.3	23.8	107.8	103.9	2	1.7	2.2	0	0	3	13	1	0	0	1	0	0	0	0	0	1
27	21	2	33	13	1	1	0.6	5.3	23.8	107.8	103.9	1	2.1	3	0	0	1	21	1	1	0	1	0	0	0	0	0	1
27	21	2	33	13	1	1	0.6	5.3	23.8	107.8	103.9	2	1.4	2	0	0	1	21	1	0	0	0	0	0	0	0	0	0
27	22	2	33	13	1	1	0.6	5.3	23.8	107.8	103.9	1	3.1	3.2	0	0	2	22	1	1	1	1	0	0	0	0	1	1
27	22	2	33	13	1	1	0.6	5.3	23.8	107.8	103.9	2	1.5	1.6	0	0	2	22	1	0	0	0	0	0	0	0	0	0
27	23	2	33	13	1	1	0.6	5.3	23.8	107.8	103.9	1	1.9	3.6	0	0	3	23	1	1	0	1	0	0	0	0	0	1
27	23	2	33	13	1	1	0.6	5.3	23.8	107.8	103.9	2	1.7	2.8	0	0	3	23	1	0	0	1	0	0	0	0	0	1
27	31	2	33	13	1	1	0.6	5.3	23.8	107.8	103.9	1	4.2	8.3	0	0	4	31	2	1	1	1	0	0	0	0	2	3
27	31	2	33	13	1	1	0.6	5.3	23.8	107.8	103.9	2	3.2	1.8	0	0	4	31	2	0	1	0	0	0	0	0	1	0
27	32	2	33	13	1	1	0.6	5.3	23.8	107.8	103.9	1	3.4	7.9	0	0	5	32	2	1	1	1	0	0	0	0	1	3
27	32	2	33	13	1	1	0.6	5.3	23.8	107.8	103.9	2	3.2	1.6	0	0	5	32	2	0	1	0	0	0	0	0	1	0
27	33	2	33	13	1	1	0.6	5.3	23.8	107.8	103.9	1	2.8	3.6	0	0	6	33	2	1	1	1	0	0	0	0	1	1
27	33	2	33	13	1	1	0.6	5.3	23.8	107.8	103.9	2	1.7	2.8	0	0	6	33	2	0	0	1	0	0	0	0	0	1
27	41	2	33	13	1	1	0.6	5.3	23.8	107.8	103.9	1	3.8	7.4	0	0	4	41	2	1	1	1	0	0	0	0	1	3
27	41	2	33	13	1	1	0.6	5.3	23.8	107.8	103.9	2	2.9	1.7	0	0	4	41	2	0	1	0	0	0	0	0	1	0
27	42	2	33	13	1	1	0.6	5.3	23.8	107.8	103.9	1	3.6	7.4	3.3	0	5	42	2	1	1	1	1	0	1	0	1	3
27	42	2	33	13	1	1	0.6	5.3	23.8	107.8	103.9	2	2.7	2	0	0	5	42	2	0	1	0	0	0	0	0	1	0
27	43	2	33	13	1	1	0.6	5.3	23.8	107.8	103.9	1	2.7	2.2	0	0	6	43	2	1	1	1	0	0	0	0	1	1
27	43	2	33	13	1	1	0.6	5.3	23.8	107.8	103.9	2	3.4	2.4	0	0	6	43	2	0	1	1	0	0	0	0	1	1
28	11	2	22	13	1	0	0	2.7	40.7	110.7	93.2	1	1.5	1.4	0	0	1	11	1	1	0	0	0	0	0	0	0	0
28	11	2	22	13	1	0	0	2.7	40.7	110.7	93.2	2	1.6	1.8	0	0	1	11	1	0	0	0	0	0	0	0	0	0
28	12	2	22	13	1	0	0	2.7	40.7	110.7	93.2	1	1.5	1.5	0	0	2	12	1	1	0	0	0	0	0	0	0	0
28	12	2	22	13	1	0	0	2.7	40.7	110.7	93.2	2	1.1	1.3	0	0	2	12	1	0	0	0	0	0	0	0	0	0
28	13	2	22	13	1	0	0	2.7	40.7	110.7	93.2	1	2.3	2.8	0	0	3	13	1	1	1	1	0	0	0	0	1	1
28	13	2	22	13	1	0	0	2.7	40.7	110.7	93.2	2	1.9	1.9	0	0	3	13	1	0	0	0	0	0	0	0	0	0
28	21	2	22	13	1	0	0	2.7	40.7	110.7	93.2	1	1.2	1.6	0	0	1	21	1	1	0	0	0	0	0	0	0	0
28	21	2	22	13	1	0	0	2.7	40.7	110.7	93.2	2	1.5	1.6	0	0	1	21	1	0	0	0	0	0	0	0	0	0
28	22	2	22	13	1	0	0	2.7	40.7	110.7	93.2	1	2	2	0	0	2	22	1	1	0	0	0	0	0	0	0	0
28	22	2	22	13	1	0	0	2.7	40.7	110.7	93.2	2	1.2	1.6	0	0	2	22	1	0	0	0	0	0	0	0	0	0
28	23	2	22	13	1	0	0	2.7	40.7	110.7	93.2	1	4.2	4.3	0	3	3	23	1	1	1	1	0	1	0	1	2	2
28	23	2	22	13	1	0	0	2.7	40.7	110.7	93.2	2	3.2	3.2	0	0	3	23	1	0	1	1	0	0	0	0	1	1
28	31	2	22	13	1	0	0	2.7	40.7	110.7	93.2	1	1.9	1.7	0	0	4	31	2	1	0	0	0	0	0	0	0	0
28	31	2	22	13	1	0	0	2.7	40.7	110.7	93.2	2	1.9	1.6	0	0	4	31	2	0	0	0	0	0	0	0	0	0
28	32	2	22	13	1	0	0	2.7	40.7	110.7	93.2	1	2.6	2	0	0	5	32	2	1	1	0	0	0	0	0	1	0
28	32	2	22	13	1	0	0	2.7	40.7	110.7	93.2	2	2.5	2.6	0	0	5	32	2	0	1	1	0	0	0	0	1	1
28	33	2	22	13	1	0	0	2.7	40.7	110.7	93.2	1	2.2	3.2	0	0	6	33	2	1	1	1	0	0	0	0	1	1
28	33	2	22	13	1	0	0	2.7	40.7	110.7	93.2	2	2	2.1	0	0	6	33	2	0	0	0	0	0	0	0	0	0
28	41	2	22	13	1	0	0	2.7	40.7	110.7	93.2	1	2.5	2.6	0	0	4	41	2	1	1	1	0	0	0	0	1	1
28	41	2	22	13	1	0	0	2.7	40.7	110.7	93.2	2	1.8	1.7	0	0	4	41	2	0	0	0	0	0	0	0	0	0
28	42	2	22	13	1	0	0	2.7	40.7	110.7	93.2	1	1.6	1.5	0	0	5	42	2	1	0	0	0	0	0	0	0	0
28	42	2	22	13	1	0	0	2.7	40.7	110.7	93.2	2	1.1	1.4	0	0	5	42	2	0	0	0	0	0	0	0	0	0
28	43	2	22	13	1	0	0	2.7	40.7	110.7	93.2	1	1.9	2.8	0	0	6	43	2	1	0	1	0	0	0	0	0	1
28	43	2	22	13	1	0	0	2.7	40.7	110.7	93.2	2	1.6	2	0	0	6	43	2	0	0	0	0	0	0	0	0	0
29	11	2	37	10	1	0.2	0.6	3.9	29.1	120	101.8	1	1.2	1.5	0	0	1	11	1	1	0	0	0	0	0	0	0	0
29	11	2	37	10	1	0.2	0.6	3.9	29.1	120	101.8	2	1.5	3.5	0	0	1	11	1	0	0	1	0	0	0	0	0	1
29	12	2	37	10	1	0.2	0.6	3.9	29.1	120	101.8	1	1.9	5	6.6	0	2	12	1	1	0	1	1	0	3	0	0	2
29	12	2	37	10	1	0.2	0.6	3.9	29.1	120	101.8	2	3.5	7.5	0	0	2	12	1	0	1	1	0	0	0	0	1	3
29	13	2	37	10	1	0.2	0.6	3.9	29.1	120	101.8	1	1.8	2.2	0	0	3	13	1	1	0	1	0	0	0	0	0	1
29	13	2	37	10	1	0.2	0.6	3.9	29.1	120	101.8	2	4.1	5.2	0	0	3	13	1	0	1	1	0	0	0	0	2	2
29	21	2	37	10	1	0.2	0.6	3.9	29.1	120	101.8	1	1.1	1.6	0	0	1	21	1	1	0	0	0	0	0	0	0	0
29	21	2	37	10	1	0.2	0.6	3.9	29.1	120	101.8	2	1.7	4.2	0	0	1	21	1	0	0	1	0	0	0	0	0	2
29	22	2	37	10	1	0.2	0.6	3.9	29.1	120	101.8	1	2.8	2.5	5.2	0	2	22	1	1	1	1	1	0	2	0	1	1
29	22	2	37	10	1	0.2	0.6	3.9	29.1	120	101.8	2	1.9	6.8	0	0	2	22	1	0	0	1	0	0	0	0	0	3
29	23	2	37	10	1	0.2	0.6	3.9	29.1	120	101.8	1	11.4	2.4	0	0	3	23	1	1	1	1	0	0	0	0	3	1
29	23	2	37	10	1	0.2	0.6	3.9	29.1	120	101.8	2	2.2	7.1	0	0	3	23	1	0	1	1	0	0	0	0	1	3
29	31	2	37	10	1	0.2	0.6	3.9	29.1	120	101.8	1	1.6	6.1	0	0	4	31	2	1	0	1	0	0	0	0	0	3
29	31	2	37	10	1	0.2	0.6	3.9	29.1	120	101.8	2	1.9	5.6	0	0	4	31	2	0	0	1	0	0	0	0	0	2
29	32	2	37	10	1	0.2	0.6	3.9	29.1	120	101.8	1	2	2.2	3.9	2.3	5	32	2	1	0	1	1	0	1	0	0	1
29	32	2	37	10	1	0.2	0.6	3.9	29.1	120	101.8	2	2	6	0	0	5	32	2	0	0	1	0	0	0	0	0	2
29	33	2	37	10	1	0.2	0.6	3.9	29.1	120	101.8	1	3.2	3.1	0	0	6	33	2	1	1	1	0	0	0	0	1	1
29	33	2	37	10	1	0.2	0.6	3.9	29.1	120	101.8	2	2.5	3.9	0	0	6	33	2	0	1	1	0	0	0	0	1	1
29	41	2	37	10	1	0.2	0.6	3.9	29.1	120	101.8	1	1.1	1.8	0	2.9	4	41	2	1	0	0	0	1	0	1	0	0
29	41	2	37	10	1	0.2	0.6	3.9	29.1	120	101.8	2	2.2	7.3	0	0	4	41	2	0	1	1	0	0	0	0	1	3
29	42	2	37	10	1	0.2	0.6	3.9	29.1	120	101.8	1	2	1.5	0	3.3	5	42	2	1	0	0	0	1	0	1	0	0
29	42	2	37	10	1	0.2	0.6	3.9	29.1	120	101.8	2	2.2	2	0	0	5	42	2	0	1	0	0	0	0	0	1	0
29	43	2	37	10	1	0.2	0.6	3.9	29.1	120	101.8	1	6.7	5.6	0	0	6	43	2	1	1	1	0	0	0	0	3	2
29	43	2	37	10	1	0.2	0.6	3.9	29.1	120	101.8	2	2.4	4.3	0	0	6	43	2	0	1	1	0	0	0	0	1	2
30	11	1	22	9.5	1	0	1	6	35.7	106.6	108.8	1	1.1	1.8	4.9	9.4	1	11	1	1	0	0	1	1	2	3	0	0
30	11	1	22	9.5	1	0	1	6	35.7	106.6	108.8	2	1.2	1	0	0	1	11	1	0	0	0	0	0	0	0	0	0
30	12	1	22	9.5	1	0	1	6	35.7	106.6	108.8	1	3	2.6	3.9	4.8	2	12	1	1	1	1	1	1	1	2	1	1
30	12	1	22	9.5	1	0	1	6	35.7	106.6	108.8	2	1.1	1.7	0	0	2	12	1	0	0	0	0	0	0	0	0	0
30	13	1	22	9.5	1	0	1	6	35.7	106.6	108.8	1	1.3	2.6	5.3	10.4	3	13	1	1	0	1	1	1	2	3	0	1
30	13	1	22	9.5	1	0	1	6	35.7	106.6	108.8	2	1.7	1.2	0	0	3	13	1	0	0	0	0	0	0	0	0	0
30	21	1	22	9.5	1	0	1	6	35.7	106.6	108.8	1	1.1	1.3	5.9	2.7	1	21	1	1	0	0	1	1	2	1	0	0
30	21	1	22	9.5	1	0	1	6	35.7	106.6	108.8	2	1	1.2	0	0	1	21	1	0	0	0	0	0	0	0	0	0
30	22	1	22	9.5	1	0	1	6	35.7	106.6	108.8	1	1.6	1.3	3	2.3	2	22	1	1	0	0	1	0	1	0	0	0
30	22	1	22	9.5	1	0	1	6	35.7	106.6	108.8	2	0.9	2	0	0	2	22	1	0	0	0	0	0	0	0	0	0
30	23	1	22	9.5	1	0	1	6	35.7	106.6	108.8	1	1.9	2	4.6	8	3	23	1	1	0	0	1	1	2	3	0	0
30	23	1	22	9.5	1	0	1	6	35.7	106.6	108.8	2	1	1.7	0	0	3	23	1	0	0	0	0	0	0	0	0	0
30	31	1	22	9.5	1	0	1	6	35.7	106.6	108.8	1	1.6	1.6	0	7.7	4	31	2	1	0	0	0	1	0	3	0	0
30	31	1	22	9.5	1	0	1	6	35.7	106.6	108.8	2	1.5	1.1	0	0	4	31	2	0	0	0	0	0	0	0	0	0
30	32	1	22	9.5	1	0	1	6	35.7	106.6	108.8	1	1.2	1.7	0	3.3	5	32	2	1	0	0	0	1	0	1	0	0
30	32	1	22	9.5	1	0	1	6	35.7	106.6	108.8	2	1.4	1.5	0	0	5	32	2	0	0	0	0	0	0	0	0	0
30	33	1	22	9.5	1	0	1	6	35.7	106.6	108.8	1	1	2.4	0	9.8	6	33	2	1	0	1	0	1	0	3	0	1
30	33	1	22	9.5	1	0	1	6	35.7	106.6	108.8	2	1.6	1.3	0	0	6	33	2	0	0	0	0	0	0	0	0	0
30	41	1	22	9.5	1	0	1	6	35.7	106.6	108.8	1	1.4	1.5	0	5.4	4	41	2	1	0	0	0	1	0	2	0	0
30	41	1	22	9.5	1	0	1	6	35.7	106.6	108.8	2	1.8	1.5	0	0	4	41	2	0	0	0	0	0	0	0	0	0
30	42	1	22	9.5	1	0	1	6	35.7	106.6	108.8	1	1.4	10.6	1.8	3.3	5	42	2	1	0	1	0	1	0	1	0	3
30	42	1	22	9.5	1	0	1	6	35.7	106.6	108.8	2	1.6	2.6	0	0	5	42	2	0	0	1	0	0	0	0	0	1
30	43	1	22	9.5	1	0	1	6	35.7	106.6	108.8	1	1.4	8.9	3.1	7.2	6	43	2	1	0	1	1	1	1	3	0	3
30	43	1	22	9.5	1	0	1	6	35.7	106.6	108.8	2	1.6	2.9	0	0	6	43	2	0	0	1	0	0	0	0	0	1
1	11	2	23	9	2	0	0	4.3	41	89.5	93	1	1.7	1.5	0	0	1	11	1	1	0	0	0	0	0	0	0	0

## Sheet: twice evaluation of observer 1
Name	Gender	Age	durationMonth	Crowding-maxilla-2	Crowding-mandible-2	ANB-2	MPSN-2	U1SN-2	L1MP-2	T0ABD-2	T1ABD-2	T0ABF-2	T1ABF-2	Tooth	labial/lingial
1	2	23	9	0	0	4	42	89.5	92.6	1.6	1.2	0	0	11	1
2	1	28	11	1.1	3.7	1.5	22	114.7	90.1	1.5	1.8	0	0	11	1
3	2	30	15	3.4	1.3	7.3	30.1	57.9	81.4	1.7	2	0	0	11	1
4	2	22	13	1.7	1	3.8	17.4	87.3	105.6	1.6	1.5	0	0	11	1
5	2	32	15	3.8	4.4	7.8	40.1	88	98.4	1.3	1.3	0	4.8	11	1
6	2	28	9	0.8	3	1.5	34.6	117.5	91.9	1.4	1.4	0	0	11	1
7	2	25	14	1.6	3.4	3.3	23.5	102.1	88.7	1.8	1.4	0	0	11	1
8	2	27	9.5	4.5	2.5	5.3	39.4	97.9	94.4	1.6	10.2	0	0	11	1
9	2	28	8.5	2.9	5.7	7.3	45.2	101.7	92	2.8	2.6	0	0	11	1
10	2	28	11	1.4	4.4	5.8	26.5	114.5	106.5	1.4	1.6	0	0	11	1
11	2	20	8	2.6	4.3	4.7	43	100.6	91.8	1	1.7	0	6.6	11	1
12	2	25	13	0	0.6	5.2	45.6	96.5	92.5	1.7	1.9	0	0	11	1
13	2	28	16	0.9	0.6	7.3	40.3	82.9	92.1	1.7	1.6	0	0	11	1
14	1	18	10	0	0	2.2	36.2	102.2	86.4	1.2	1.6	0	0	11	1
15	2	30	12	2.6	4.2	3.3	31.2	94	89.7	1.9	2.5	0	0	11	1
16	2	27	10	0.7	2.8	4.8	40.6	102.8	89.4	1.4	1.8	0	0	11	1
17	2	28	13	0.7	0.5	2.8	28.9	101.8	99.4	1.8	1.9	0	0	11	1
18	2	28	10	3.7	1.8	5.5	46.7	101.2	96.7	1.2	2.1	0	0	11	1
19	2	26	9.5	0	2.2	5.4	30	87.2	86.1	1.6	1.4	0	0	11	1
20	2	23	11	0.6	2.6	5.2	44.5	102.2	95	14.1	3.3	0	4	11	1
21	2	33	13	0.5	0.3	3.8	31.5	92.8	98.6	1.9	1.7	0	0	11	1
22	1	26	16	0.9	3.5	4	33.8	100.7	98.8	1.3	1.1	2.8	2.4	11	1
23	2	21	14	0.8	1.4	7.5	33.4	102.9	114	1.8	2.3	0	0	11	1
24	2	24	14	2.4	3	2.9	30.1	112.1	92.8	2.9	2.4	0	0	11	1
25	2	23	11	0.8	0.3	2.3	37.8	101.5	92.6	1.4	1	0	0	11	1
26	1	19	10	0.5	0.5	1.7	23.4	112.4	96.3	1.1	1.1	0	0	11	1
27	2	33	13	1.1	0.6	5.2	23.6	108.2	104.4	2.5	1.9	0	0	11	1
28	2	22	13	0	0	2.9	40.9	108.8	93.1	1.7	1.2	0	0	11	1
29	2	37	10	0	0.4	3.7	29.4	118.4	101	1.4	1.4	0	0	11	1
30	1	22	9.5	0	0.9	5.9	36.2	104.8	108.6	1.3	2	5	9.6	11	1
1	2	23	9	0	0	4	42	89.5	92.6	1.9	1	2	1.9	12	1
2	1	28	11	1.1	3.7	1.5	22	114.7	90.1	1.8	1.5	2.4	2.2	12	1
3	2	30	15	3.4	1.3	7.3	30.1	57.9	81.4	1.5	1.6	0	0	12	1
4	2	22	13	1.7	1	3.8	17.4	87.3	105.6	2.9	2.9	5.5	0	12	1
5	2	32	15	3.8	4.4	7.8	40.1	88	98.4	12	10.1	0	0	12	1
6	2	28	9	0.8	3	1.5	34.6	117.5	91.9	1.8	1.6	0	0	12	1
7	2	25	14	1.6	3.4	3.3	23.5	102.1	88.7	1.3	1.1	4.4	3.2	12	1
8	2	27	9.5	4.5	2.5	5.3	39.4	97.9	94.4	11.9	10.6	0	2.8	12	1
9	2	28	8.5	2.9	5.7	7.3	45.2	101.7	92	2.6	2	6.5	6.9	12	1
10	2	28	11	1.4	4.4	5.8	26.5	114.5	106.5	1.6	1.2	0	0	12	1
11	2	20	8	2.6	4.3	4.7	43	100.6	91.8	1.1	1.6	0	0	12	1
12	2	25	13	0	0.6	5.2	45.6	96.5	92.5	2.7	2.2	6.8	5.5	12	1
13	2	28	16	0.9	0.6	7.3	40.3	82.9	92.1	3	2.5	0	2.2	12	1
14	1	18	10	0	0	2.2	36.2	102.2	86.4	0	1.8	0	0	12	1
15	2	30	12	2.6	4.2	3.3	31.2	94	89.7	1.2	2.5	0	4.5	12	1
16	2	27	10	0.7	2.8	4.8	40.6	102.8	89.4	0.9	1.9	2.2	6.9	12	1
17	2	28	13	0.7	0.5	2.8	28.9	101.8	99.4	1.5	1.5	0	2	12	1
18	2	28	10	3.7	1.8	5.5	46.7	101.2	96.7	1.7	1.7	4.2	3.5	12	1
19	2	26	9.5	0	2.2	5.4	30	87.2	86.1	1.2	2	5.6	0	12	1
20	2	23	11	0.6	2.6	5.2	44.5	102.2	95	2.7	6.8	0	0	12	1
21	2	33	13	0.5	0.3	3.8	31.5	92.8	98.6	10.8	11.6	0	0	12	1
22	1	26	16	0.9	3.5	4	33.8	100.7	98.8	1.4	2.4	0	2.2	12	1
23	2	21	14	0.8	1.4	7.5	33.4	102.9	114	1.9	1.9	0	0	12	1
24	2	24	14	2.4	3	2.9	30.1	112.1	92.8	3.3	3.8	0	2.3	12	1
25	2	23	11	0.8	0.3	2.3	37.8	101.5	92.6	1.3	2.2	0	0	12	1
26	1	19	10	0.5	0.5	1.7	23.4	112.4	96.3	1.7	2.6	0	0	12	1
27	2	33	13	1.1	0.6	5.2	23.6	108.2	104.4	2.3	2.8	0	0	12	1
28	2	22	13	0	0	2.9	40.9	108.8	93.1	1.3	1.7	0	0	12	1
29	2	37	10	0	0.4	3.7	29.4	118.4	101	1.7	4.8	6.7	0	12	1
30	1	22	9.5	0	0.9	5.9	36.2	104.8	108.6	3.1	2.3	3.6	5	12	1
1	2	23	9	0	0	4	42	89.5	92.6	2	1	5.2	6.9	13	1
2	1	28	11	1.1	3.7	1.5	22	114.7	90.1	2	1.6	0	0	13	1
3	2	30	15	3.4	1.3	7.3	30.1	57.9	81.4	1.8	1.9	0	2.3	13	1
4	2	22	13	1.7	1	3.8	17.4	87.3	105.6	4	3.4	0	3.9	13	1
5	2	32	15	3.8	4.4	7.8	40.1	88	98.4	4.3	12.2	0	2.1	13	1
6	2	28	9	0.8	3	1.5	34.6	117.5	91.9	1.9	2.3	0	6.6	13	1
7	2	25	14	1.6	3.4	3.3	23.5	102.1	88.7	1.7	0.8	0	5.5	13	1
8	2	27	9.5	4.5	2.5	5.3	39.4	97.9	94.4	1.7	10.5	0	0	13	1
9	2	28	8.5	2.9	5.7	7.3	45.2	101.7	92	1.3	1.7	2.4	7	13	1
10	2	28	11	1.4	4.4	5.8	26.5	114.5	106.5	2.6	1.7	0	0	13	1
11	2	20	8	2.6	4.3	4.7	43	100.6	91.8	1.6	2.5	0	5.7	13	1
12	2	25	13	0	0.6	5.2	45.6	96.5	92.5	2.6	2	0	3.4	13	1
13	2	28	16	0.9	0.6	7.3	40.3	82.9	92.1	2.2	2.4	0	0	13	1
14	1	18	10	0	0	2.2	36.2	102.2	86.4	0	1.2	0	0	13	1
15	2	30	12	2.6	4.2	3.3	31.2	94	89.7	2.1	2.3	0	0	13	1
16	2	27	10	0.7	2.8	4.8	40.6	102.8	89.4	1.1	1.5	2	0	13	1
17	2	28	13	0.7	0.5	2.8	28.9	101.8	99.4	1.2	2	1.8	3.1	13	1
18	2	28	10	3.7	1.8	5.5	46.7	101.2	96.7	3.4	3.3	0	0	13	1
19	2	26	9.5	0	2.2	5.4	30	87.2	86.1	1.3	2.1	5.4	0	13	1
20	2	23	11	0.6	2.6	5.2	44.5	102.2	95	3.4	3.3	0	6.1	13	1
21	2	33	13	0.5	0.3	3.8	31.5	92.8	98.6	1.8	2.8	8.2	8.8	13	1
22	1	26	16	0.9	3.5	4	33.8	100.7	98.8	2	2.3	0	6.2	13	1
23	2	21	14	0.8	1.4	7.5	33.4	102.9	114	1	1.2	0	0	13	1
24	2	24	14	2.4	3	2.9	30.1	112.1	92.8	1.8	2.4	0	0	13	1
25	2	23	11	0.8	0.3	2.3	37.8	101.5	92.6	0.8	1.3	0	8.1	13	1
26	1	19	10	0.5	0.5	1.7	23.4	112.4	96.3	1.4	1.4	0	0	13	1
27	2	33	13	1.1	0.6	5.2	23.6	108.2	104.4	1.4	4	0	0	13	1
28	2	22	13	0	0	2.9	40.9	108.8	93.1	2.2	2.5	0	0	13	1
29	2	37	10	0	0.4	3.7	29.4	118.4	101	1.7	1.9	0	0	13	1
30	1	22	9.5	0	0.9	5.9	36.2	104.8	108.6	1.5	2.8	5.4	10.5	13	1
1	2	23	9	0	0	4	42	89.5	92.6	1.7	0.8	0	0	21	1
2	1	28	11	1.1	3.7	1.5	22	114.7	90.1	1.4	1.5	0	0	21	1
3	2	30	15	3.4	1.3	7.3	30.1	57.9	81.4	2.8	1.3	3.8	0	21	1
4	2	22	13	1.7	1	3.8	17.4	87.3	105.6	1.6	2.2	0	2	21	1
5	2	32	15	3.8	4.4	7.8	40.1	88	98.4	2.1	3	0	0	21	1
6	2	28	9	0.8	3	1.5	34.6	117.5	91.9	1.3	1.1	0	0	21	1
7	2	25	14	1.6	3.4	3.3	23.5	102.1	88.7	1.4	1	0	0	21	1
8	2	27	9.5	4.5	2.5	5.3	39.4	97.9	94.4	1	1.5	0	0	21	1
9	2	28	8.5	2.9	5.7	7.3	45.2	101.7	92	1.8	2.6	0	0	21	1
10	2	28	11	1.4	4.4	5.8	26.5	114.5	106.5	1.1	1.8	0	0	21	1
11	2	20	8	2.6	4.3	4.7	43	100.6	91.8	1.3	1.4	0	0	21	1
12	2	25	13	0	0.6	5.2	45.6	96.5	92.5	1.7	1.2	6.2	0	21	1
13	2	28	16	0.9	0.6	7.3	40.3	82.9	92.1	1.9	1.6	0	0	21	1
14	1	18	10	0	0	2.2	36.2	102.2	86.4	0.2	1	0	0	21	1
15	2	30	12	2.6	4.2	3.3	31.2	94	89.7	2.5	10.9	0	0	21	1
16	2	27	10	0.7	2.8	4.8	40.6	102.8	89.4	1.5	1.9	0	0	21	1
17	2	28	13	0.7	0.5	2.8	28.9	101.8	99.4	1.9	1.8	1.9	0	21	1
18	2	28	10	3.7	1.8	5.5	46.7	101.2	96.7	1.2	3.1	0	0	21	1
19	2	26	9.5	0	2.2	5.4	30	87.2	86.1	1.2	1.6	0	0	21	1
20	2	23	11	0.6	2.6	5.2	44.5	102.2	95	2.8	2.9	0	0	21	1
21	2	33	13	0.5	0.3	3.8	31.5	92.8	98.6	1.7	2.1	0	0	21	1
22	1	26	16	0.9	3.5	4	33.8	100.7	98.8	1.8	1.9	0	0	21	1
23	2	21	14	0.8	1.4	7.5	33.4	102.9	114	1.8	1.3	0	0	21	1
24	2	24	14	2.4	3	2.9	30.1	112.1	92.8	2.6	2.6	0	0	21	1
25	2	23	11	0.8	0.3	2.3	37.8	101.5	92.6	1.4	1.3	0	0	21	1
26	1	19	10	0.5	0.5	1.7	23.4	112.4	96.3	1.5	0.7	0	0	21	1
27	2	33	13	1.1	0.6	5.2	23.6	108.2	104.4	1.9	2.9	0	0	21	1
28	2	22	13	0	0	2.9	40.9	108.8	93.1	1.4	1.7	0	0	21	1
29	2	37	10	0	0.4	3.7	29.4	118.4	101	1	1.4	0	0	21	1
30	1	22	9.5	0	0.9	5.9	36.2	104.8	108.6	0.9	1.3	5.7	2.7	21	1
1	2	23	9	0	0	4	42	89.5	92.6	2	1.4	4.7	5.9	22	1
2	1	28	11	1.1	3.7	1.5	22	114.7	90.1	1.2	1.3	0	2	22	1
3	2	30	15	3.4	1.3	7.3	30.1	57.9	81.4	1.8	1.2	6.5	0	22	1
4	2	22	13	1.7	1	3.8	17.4	87.3	105.6	4.9	3.9	5.9	0	22	1
5	2	32	15	3.8	4.4	7.8	40.1	88	98.4	11.1	11.2	0	2.1	22	1
6	2	28	9	0.8	3	1.5	34.6	117.5	91.9	2.1	1.5	0	0	22	1
7	2	25	14	1.6	3.4	3.3	23.5	102.1	88.7	1.4	1.1	0	0	22	1
8	2	27	9.5	4.5	2.5	5.3	39.4	97.9	94.4	1.5	11.5	5.9	3.3	22	1
9	2	28	8.5	2.9	5.7	7.3	45.2	101.7	92	2.1	3	6.1	2.3	22	1
10	2	28	11	1.4	4.4	5.8	26.5	114.5	106.5	1.7	1.6	0	0	22	1
11	2	20	8	2.6	4.3	4.7	43	100.6	91.8	2.3	2.7	0	0	22	1
12	2	25	13	0	0.6	5.2	45.6	96.5	92.5	2.5	1.7	0	1.8	22	1
13	2	28	16	0.9	0.6	7.3	40.3	82.9	92.1	3.8	2.8	0	0	22	1
14	1	18	10	0	0	2.2	36.2	102.2	86.4	1.7	1.7	0	0	22	1
15	2	30	12	2.6	4.2	3.3	31.2	94	89.7	1.8	3	0	0	22	1
16	2	27	10	0.7	2.8	4.8	40.6	102.8	89.4	1.6	1.7	0	2	22	1
17	2	28	13	0.7	0.5	2.8	28.9	101.8	99.4	1.9	2	3	3.3	22	1
18	2	28	10	3.7	1.8	5.5	46.7	101.2	96.7	1.8	2.8	4	5.6	22	1
19	2	26	9.5	0	2.2	5.4	30	87.2	86.1	1.1	0.7	2.1	2	22	1
20	2	23	11	0.6	2.6	5.2	44.5	102.2	95	3.1	4.7	0	0	22	1
21	2	33	13	0.5	0.3	3.8	31.5	92.8	98.6	11.8	11.8	0	0	22	1
22	1	26	16	0.9	3.5	4	33.8	100.7	98.8	1.6	2.1	0	2	22	1
23	2	21	14	0.8	1.4	7.5	33.4	102.9	114	1.7	1.6	0	0	22	1
24	2	24	14	2.4	3	2.9	30.1	112.1	92.8	2.5	2.6	0	0	22	1
25	2	23	11	0.8	0.3	2.3	37.8	101.5	92.6	2.1	1.5	3	3.3	22	1
26	1	19	10	0.5	0.5	1.7	23.4	112.4	96.3	2	1.8	0	0	22	1
27	2	33	13	1.1	0.6	5.2	23.6	108.2	104.4	3.1	3.2	0	0	22	1
28	2	22	13	0	0	2.9	40.9	108.8	93.1	1.8	1.9	0	0	22	1
29	2	37	10	0	0.4	3.7	29.4	118.4	101	2.9	2.5	5.3	0	22	1
30	1	22	9.5	0	0.9	5.9	36.2	104.8	108.6	1.4	1.3	3.2	2.1	22	1
1	2	23	9	0	0	4	42	89.5	92.6	1.4	1.1	0	0	23	1
2	1	28	11	1.1	3.7	1.5	22	114.7	90.1	1.5	1.2	0	2.3	23	1
3	2	30	15	3.4	1.3	7.3	30.1	57.9	81.4	1.8	1.6	0	6.2	23	1
4	2	22	13	1.7	1	3.8	17.4	87.3	105.6	3.9	2.8	0	6.7	23	1
5	2	32	15	3.8	4.4	7.8	40.1	88	98.4	3.4	12.4	8.1	2.5	23	1
6	2	28	9	0.8	3	1.5	34.6	117.5	91.9	12.8	13.1	0	0	23	1
7	2	25	14	1.6	3.4	3.3	23.5	102.1	88.7	3.2	1.5	0	7.3	23	1
8	2	27	9.5	4.5	2.5	5.3	39.4	97.9	94.4	1.2	2.1	9.8	7.1	23	1
9	2	28	8.5	2.9	5.7	7.3	45.2	101.7	92	1.3	1.2	0	6.6	23	1
10	2	28	11	1.4	4.4	5.8	26.5	114.5	106.5	2.9	3.9	0	3.1	23	1
11	2	20	8	2.6	4.3	4.7	43	100.6	91.8	2.1	1.9	0	8.7	23	1
12	2	25	13	0	0.6	5.2	45.6	96.5	92.5	2	1.8	0	7	23	1
13	2	28	16	0.9	0.6	7.3	40.3	82.9	92.1	1.8	2	0	3.8	23	1
14	1	18	10	0	0	2.2	36.2	102.2	86.4	1.8	1.4	0	0	23	1
15	2	30	12	2.6	4.2	3.3	31.2	94	89.7	1.7	2.7	0	0	23	1
16	2	27	10	0.7	2.8	4.8	40.6	102.8	89.4	1.6	1.5	0	2.2	23	1
17	2	28	13	0.7	0.5	2.8	28.9	101.8	99.4	2.9	3.2	3.5	0	23	1
18	2	28	10	3.7	1.8	5.5	46.7	101.2	96.7	4.3	3.3	0	4.1	23	1
19	2	26	9.5	0	2.2	5.4	30	87.2	86.1	1.1	1.8	6.1	5.5	23	1
20	2	23	11	0.6	2.6	5.2	44.5	102.2	95	2.7	3.8	0	7.9	23	1
21	2	33	13	0.5	0.3	3.8	31.5	92.8	98.6	1.8	2.4	3.5	3.4	23	1
22	1	26	16	0.9	3.5	4	33.8	100.7	98.8	1.9	3	8.9	6.7	23	1
23	2	21	14	0.8	1.4	7.5	33.4	102.9	114	1.3	1.2	0	0	23	1
24	2	24	14	2.4	3	2.9	30.1	112.1	92.8	1.8	2.6	0	2.3	23	1
25	2	23	11	0.8	0.3	2.3	37.8	101.5	92.6	1.6	1.9	0	1.9	23	1
26	1	19	10	0.5	0.5	1.7	23.4	112.4	96.3	2	2	0	0	23	1
27	2	33	13	1.1	0.6	5.2	23.6	108.2	104.4	2	3.4	0	0	23	1
28	2	22	13	0	0	2.9	40.9	108.8	93.1	4.3	4.5	0	2.8	23	1
29	2	37	10	0	0.4	3.7	29.4	118.4	101	11.3	2.4	0	0	23	1
30	1	22	9.5	0	0.9	5.9	36.2	104.8	108.6	1.9	2	4.5	8	23	1
1	2	23	9	0	0	4	42	89.5	92.6	9.3	5.6	0	0	31	1
2	1	28	11	1.1	3.7	1.5	22	114.7	90.1	1.8	2.3	0	2.3	31	1
3	2	30	15	3.4	1.3	7.3	30.1	57.9	81.4	5.9	8.1	0	0	31	1
4	2	22	13	1.7	1	3.8	17.4	87.3	105.6	1.6	4.7	0	0	31	1
5	2	32	15	3.8	4.4	7.8	40.1	88	98.4	4.6	8	0	2.4	31	1
6	2	28	9	0.8	3	1.5	34.6	117.5	91.9	1.4	10.3	0	0	31	1
7	2	25	14	1.6	3.4	3.3	23.5	102.1	88.7	1.6	7	0	0	31	1
8	2	27	9.5	4.5	2.5	5.3	39.4	97.9	94.4	1.7	3	0	0	31	1
9	2	28	8.5	2.9	5.7	7.3	45.2	101.7	92	2	7.1	0	2.5	31	1
10	2	28	11	1.4	4.4	5.8	26.5	114.5	106.5	1.5	6.8	1.1	2.3	31	1
11	2	20	8	2.6	4.3	4.7	43	100.6	91.8	1.8	2.4	0	0	31	1
12	2	25	13	0	0.6	5.2	45.6	96.5	92.5	1.3	1.2	6.3	4.8	31	1
13	2	28	16	0.9	0.6	7.3	40.3	82.9	92.1	1.4	5.8	0	0	31	1
14	1	18	10	0	0	2.2	36.2	102.2	86.4	1.6	2	0	0	31	1
15	2	30	12	2.6	4.2	3.3	31.2	94	89.7	1.7	6.8	2	2.4	31	1
16	2	27	10	0.7	2.8	4.8	40.6	102.8	89.4	0.7	9.6	0	0	31	1
17	2	28	13	0.7	0.5	2.8	28.9	101.8	99.4	0.7	1.1	1.9	4.1	31	1
18	2	28	10	3.7	1.8	5.5	46.7	101.2	96.7	2.3	8.4	2	0	31	1
19	2	26	9.5	0	2.2	5.4	30	87.2	86.1	0.8	0.4	0	2.4	31	1
20	2	23	11	0.6	2.6	5.2	44.5	102.2	95	12.3	2.5	0	0	31	1
21	2	33	13	0.5	0.3	3.8	31.5	92.8	98.6	6.4	6.1	0	0	31	1
22	1	26	16	0.9	3.5	4	33.8	100.7	98.8	2.5	1.8	0	0	31	1
23	2	21	14	0.8	1.4	7.5	33.4	102.9	114	2	2.5	0	0	31	1
24	2	24	14	2.4	3	2.9	30.1	112.1	92.8	2.7	2.7	0	4.9	31	1
25	2	23	11	0.8	0.3	2.3	37.8	101.5	92.6	7.4	8.3	0	0	31	1
26	1	19	10	0.5	0.5	1.7	23.4	112.4	96.3	1.6	1.5	0	0	31	1
27	2	33	13	1.1	0.6	5.2	23.6	108.2	104.4	4.3	8	0	0	31	1
28	2	22	13	0	0	2.9	40.9	108.8	93.1	2	1.6	0	0	31	1
29	2	37	10	0	0.4	3.7	29.4	118.4	101	1.5	6	0	0	31	1
30	1	22	9.5	0	0.9	5.9	36.2	104.8	108.6	1.4	1.6	0	7.7	31	1
1	2	23	9	0	0	4	42	89.5	92.6	1.6	1.3	4.2	4.5	32	1
2	1	28	11	1.1	3.7	1.5	22	114.7	90.1	1.6	1.4	0	0	32	1
3	2	30	15	3.4	1.3	7.3	30.1	57.9	81.4	4	8.5	0	0	32	1
4	2	22	13	1.7	1	3.8	17.4	87.3	105.6	2.1	5.7	0	0	32	1
5	2	32	15	3.8	4.4	7.8	40.1	88	98.4	1.5	9.1	0	0	32	1
6	2	28	9	0.8	3	1.5	34.6	117.5	91.9	2.6	8.3	0	0	32	1
7	2	25	14	1.6	3.4	3.3	23.5	102.1	88.7	1.9	8	0	0	32	1
8	2	27	9.5	4.5	2.5	5.3	39.4	97.9	94.4	1.3	1.7	5	7.4	32	1
9	2	28	8.5	2.9	5.7	7.3	45.2	101.7	92	2.7	7.9	5.6	0	32	1
10	2	28	11	1.4	4.4	5.8	26.5	114.5	106.5	1	7.5	1.8	0	32	1
11	2	20	8	2.6	4.3	4.7	43	100.6	91.8	1.4	1.3	0	2.8	32	1
12	2	25	13	0	0.6	5.2	45.6	96.5	92.5	2.2	2.2	0	2.1	32	1
13	2	28	16	0.9	0.6	7.3	40.3	82.9	92.1	1.6	6.9	3.5	0	32	1
14	1	18	10	0	0	2.2	36.2	102.2	86.4	1.4	1.6	0	0	32	1
15	2	30	12	2.6	4.2	3.3	31.2	94	89.7	1.4	8.3	0	0	32	1
16	2	27	10	0.7	2.8	4.8	40.6	102.8	89.4	1.3	10.1	2.3	0	32	1
17	2	28	13	0.7	0.5	2.8	28.9	101.8	99.4	1.1	0.9	2.1	2.3	32	1
18	2	28	10	3.7	1.8	5.5	46.7	101.2	96.7	2.3	9	2	0	32	1
19	2	26	9.5	0	2.2	5.4	30	87.2	86.1	0	6.5	4.4	0	32	1
20	2	23	11	0.6	2.6	5.2	44.5	102.2	95	2.5	2.5	0	3	32	1
21	2	33	13	0.5	0.3	3.8	31.5	92.8	98.6	7.9	7.2	0	0	32	1
22	1	26	16	0.9	3.5	4	33.8	100.7	98.8	2.5	2.4	0	0	32	1
23	2	21	14	0.8	1.4	7.5	33.4	102.9	114	2	2	0	0	32	1
24	2	24	14	2.4	3	2.9	30.1	112.1	92.8	2.7	3.1	2.7	3.4	32	1
25	2	23	11	0.8	0.3	2.3	37.8	101.5	92.6	9.6	9.7	0	0	32	1
26	1	19	10	0.5	0.5	1.7	23.4	112.4	96.3	6.7	7.7	0	0	32	1
27	2	33	13	1.1	0.6	5.2	23.6	108.2	104.4	3.4	7.6	0	0	32	1
28	2	22	13	0	0	2.9	40.9	108.8	93.1	2.5	1.7	0	0	32	1
29	2	37	10	0	0.4	3.7	29.4	118.4	101	1.9	2.4	3.9	2.3	32	1
30	1	22	9.5	0	0.9	5.9	36.2	104.8	108.6	1	1.5	0	3.3	32	1
1	2	23	9	0	0	4	42	89.5	92.6	1.7	7.8	4.2	0	33	1
2	1	28	11	1.1	3.7	1.5	22	114.7	90.1	1.2	1.3	0	0	33	1
3	2	30	15	3.4	1.3	7.3	30.1	57.9	81.4	1	1.2	0	0	33	1
4	2	22	13	1.7	1	3.8	17.4	87.3	105.6	2.6	5.6	0	0	33	1
5	2	32	15	3.8	4.4	7.8	40.1	88	98.4	2	11.1	0	0	33	1
6	2	28	9	0.8	3	1.5	34.6	117.5	91.9	1.7	8.7	0	0	33	1
7	2	25	14	1.6	3.4	3.3	23.5	102.1	88.7	1.5	0.4	0	0	33	1
8	2	27	9.5	4.5	2.5	5.3	39.4	97.9	94.4	1.4	9.9	3.5	0	33	1
9	2	28	8.5	2.9	5.7	7.3	45.2	101.7	92	10.9	10.2	0	0	33	1
10	2	28	11	1.4	4.4	5.8	26.5	114.5	106.5	2.1	2	0	0	33	1
11	2	20	8	2.6	4.3	4.7	43	100.6	91.8	1	1.3	0	0	33	1
12	2	25	13	0	0.6	5.2	45.6	96.5	92.5	1.2	1.4	0	2.2	33	1
13	2	28	16	0.9	0.6	7.3	40.3	82.9	92.1	1.5	2.3	0	0	33	1
14	1	18	10	0	0	2.2	36.2	102.2	86.4	2.1	2.2	0	0	33	1
15	2	30	12	2.6	4.2	3.3	31.2	94	89.7	2	6.2	1.7	0	33	1
16	2	27	10	0.7	2.8	4.8	40.6	102.8	89.4	0.9	1.1	5.9	7.2	33	1
17	2	28	13	0.7	0.5	2.8	28.9	101.8	99.4	1.3	0.8	3.4	2.9	33	1
18	2	28	10	3.7	1.8	5.5	46.7	101.2	96.7	2.6	2.7	0	0	33	1
19	2	26	9.5	0	2.2	5.4	30	87.2	86.1	0	0	3.7	4.2	33	1
20	2	23	11	0.6	2.6	5.2	44.5	102.2	95	9.8	8.1	0	0	33	1
21	2	33	13	0.5	0.3	3.8	31.5	92.8	98.6	8.4	1.4	0	5.3	33	1
22	1	26	16	0.9	3.5	4	33.8	100.7	98.8	7.7	10.3	0	0	33	1
23	2	21	14	0.8	1.4	7.5	33.4	102.9	114	1.6	6.9	0	0	33	1
24	2	24	14	2.4	3	2.9	30.1	112.1	92.8	2.2	1.9	4.1	5.8	33	1
25	2	23	11	0.8	0.3	2.3	37.8	101.5	92.6	7.7	1.9	0	0	33	1
26	1	19	10	0.5	0.5	1.7	23.4	112.4	96.3	0.8	1.6	0	0	33	1
27	2	33	13	1.1	0.6	5.2	23.6	108.2	104.4	2.7	3.5	0	0	33	1
28	2	22	13	0	0	2.9	40.9	108.8	93.1	2.2	3.2	0	0	33	1
29	2	37	10	0	0.4	3.7	29.4	118.4	101	3.3	3.2	0	0	33	1
30	1	22	9.5	0	0.9	5.9	36.2	104.8	108.6	1.1	2.1	0	9.7	33	1
1	2	23	9	0	0	4	42	89.5	92.6	8.5	9.1	0	0	41	1
2	1	28	11	1.1	3.7	1.5	22	114.7	90.1	1.6	1.4	0	0	41	1
3	2	30	15	3.4	1.3	7.3	30.1	57.9	81.4	7.5	8.7	0	0	41	1
4	2	22	13	1.7	1	3.8	17.4	87.3	105.6	2.5	2.8	0	0	41	1
5	2	32	15	3.8	4.4	7.8	40.1	88	98.4	3.7	9	0	2.5	41	1
6	2	28	9	0.8	3	1.5	34.6	117.5	91.9	1.5	8.8	0	2.4	41	1
7	2	25	14	1.6	3.4	3.3	23.5	102.1	88.7	1.9	5.4	0	0	41	1
8	2	27	9.5	4.5	2.5	5.3	39.4	97.9	94.4	5.4	6.5	0	0	41	1
9	2	28	8.5	2.9	5.7	7.3	45.2	101.7	92	2.2	7.4	0	0	41	1
10	2	28	11	1.4	4.4	5.8	26.5	114.5	106.5	1.6	7.3	1.4	0	41	1
11	2	20	8	2.6	4.3	4.7	43	100.6	91.8	1.3	2.2	0	1.6	41	1
12	2	25	13	0	0.6	5.2	45.6	96.5	92.5	1.9	1.5	3.4	4.7	41	1
13	2	28	16	0.9	0.6	7.3	40.3	82.9	92.1	1.4	6.9	0	0	41	1
14	1	18	10	0	0	2.2	36.2	102.2	86.4	1.7	2.1	0	0	41	1
15	2	30	12	2.6	4.2	3.3	31.2	94	89.7	1.3	8.3	1.9	2.6	41	1
16	2	27	10	0.7	2.8	4.8	40.6	102.8	89.4	0.8	9.6	0	0	41	1
17	2	28	13	0.7	0.5	2.8	28.9	101.8	99.4	1.2	1.3	0	4.6	41	1
18	2	28	10	3.7	1.8	5.5	46.7	101.2	96.7	3.9	7.9	0	0	41	1
19	2	26	9.5	0	2.2	5.4	30	87.2	86.1	0	0.8	1.6	0	41	1
20	2	23	11	0.6	2.6	5.2	44.5	102.2	95	2.4	2.1	0	0	41	1
21	2	33	13	0.5	0.3	3.8	31.5	92.8	98.6	6.1	6.9	0	0	41	1
22	1	26	16	0.9	3.5	4	33.8	100.7	98.8	2.1	0.9	0	2.7	41	1
23	2	21	14	0.8	1.4	7.5	33.4	102.9	114	2	1.8	0	0	41	1
24	2	24	14	2.4	3	2.9	30.1	112.1	92.8	2.7	10.2	0	0	41	1
25	2	23	11	0.8	0.3	2.3	37.8	101.5	92.6	1.5	9.3	1.9	0	41	1
26	1	19	10	0.5	0.5	1.7	23.4	112.4	96.3	1.1	1.5	0	0	41	1
27	2	33	13	1.1	0.6	5.2	23.6	108.2	104.4	3.8	7.3	0	0	41	1
28	2	22	13	0	0	2.9	40.9	108.8	93.1	2.5	2.5	0	0	41	1
29	2	37	10	0	0.4	3.7	29.4	118.4	101	0.9	1.9	0	3.1	41	1
30	1	22	9.5	0	0.9	5.9	36.2	104.8	108.6	1.2	1.7	0	5.5	41	1
1	2	23	9	0	0	4	42	89.5	92.6	2	1.7	5.6	3.8	42	1
2	1	28	11	1.1	3.7	1.5	22	114.7	90.1	1.4	0.8	0	2.9	42	1
3	2	30	15	3.4	1.3	7.3	30.1	57.9	81.4	8.3	9.2	0	0	42	1
4	2	22	13	1.7	1	3.8	17.4	87.3	105.6	2.7	2.2	0	2.4	42	1
5	2	32	15	3.8	4.4	7.8	40.1	88	98.4	5.3	8.9	0	2.8	42	1
6	2	28	9	0.8	3	1.5	34.6	117.5	91.9	1.9	6.8	0	0	42	1
7	2	25	14	1.6	3.4	3.3	23.5	102.1	88.7	2.2	6.4	0	0	42	1
8	2	27	9.5	4.5	2.5	5.3	39.4	97.9	94.4	1.4	8.9	4.4	0	42	1
9	2	28	8.5	2.9	5.7	7.3	45.2	101.7	92	2	6.7	0	0	42	1
10	2	28	11	1.4	4.4	5.8	26.5	114.5	106.5	1.5	6.4	2.1	0	42	1
11	2	20	8	2.6	4.3	4.7	43	100.6	91.8	1.7	1.6	0	3.4	42	1
12	2	25	13	0	0.6	5.2	45.6	96.5	92.5	1.7	2.1	3.4	3.7	42	1
13	2	28	16	0.9	0.6	7.3	40.3	82.9	92.1	2	8.1	2.2	0	42	1
14	1	18	10	0	0	2.2	36.2	102.2	86.4	1.4	1.3	0	0	42	1
15	2	30	12	2.6	4.2	3.3	31.2	94	89.7	3.3	9.1	0	0	42	1
16	2	27	10	0.7	2.8	4.8	40.6	102.8	89.4	1.4	1.3	3.3	7	42	1
17	2	28	13	0.7	0.5	2.8	28.9	101.8	99.4	1.4	1.3	2.1	4.8	42	1
18	2	28	10	3.7	1.8	5.5	46.7	101.2	96.7	0.7	8.6	1.9	0	42	1
19	2	26	9.5	0	2.2	5.4	30	87.2	86.1	3.4	5.9	0	0	42	1
20	2	23	11	0.6	2.6	5.2	44.5	102.2	95	1.7	2.3	3.4	2.8	42	1
21	2	33	13	0.5	0.3	3.8	31.5	92.8	98.6	0.9	8.6	0	0	42	1
22	1	26	16	0.9	3.5	4	33.8	100.7	98.8	1.2	0.7	0	3	42	1
23	2	21	14	0.8	1.4	7.5	33.4	102.9	114	2	3.3	0	0	42	1
24	2	24	14	2.4	3	2.9	30.1	112.1	92.8	3	10	3.2	0	42	1
25	2	23	11	0.8	0.3	2.3	37.8	101.5	92.6	6.7	7.4	0	0	42	1
26	1	19	10	0.5	0.5	1.7	23.4	112.4	96.3	1.5	1.6	2.4	0	42	1
27	2	33	13	1.1	0.6	5.2	23.6	108.2	104.4	3.4	7.5	3.2	0	42	1
28	2	22	13	0	0	2.9	40.9	108.8	93.1	1.7	1.4	0	0	42	1
29	2	37	10	0	0.4	3.7	29.4	118.4	101	2.1	1.6	0	3.4	42	1
30	1	22	9.5	0	0.9	5.9	36.2	104.8	108.6	1.5	10.4	2.1	3.2	42	1
1	2	23	9	0	0	4	42	89.5	92.6	1.1	1.4	4	4.5	43	1
2	1	28	11	1.1	3.7	1.5	22	114.7	90.1	2	1.6	0	0	43	1
3	2	30	15	3.4	1.3	7.3	30.1	57.9	81.4	2.8	2.5	0	0	43	1
4	2	22	13	1.7	1	3.8	17.4	87.3	105.6	1	1.4	0	0	43	1
5	2	32	15	3.8	4.4	7.8	40.1	88	98.4	3.3	3.6	0	3.1	43	1
6	2	28	9	0.8	3	1.5	34.6	117.5	91.9	0.9	9.2	3.9	0	43	1
7	2	25	14	1.6	3.4	3.3	23.5	102.1	88.7	1.8	6.2	0	0	43	1
8	2	27	9.5	4.5	2.5	5.3	39.4	97.9	94.4	1	0.8	5.7	0	43	1
9	2	28	8.5	2.9	5.7	7.3	45.2	101.7	92	9.8	10	0	0	43	1
10	2	28	11	1.4	4.4	5.8	26.5	114.5	106.5	2.3	5.6	0	0	43	1
11	2	20	8	2.6	4.3	4.7	43	100.6	91.8	0.9	1.4	5.4	5.7	43	1
12	2	25	13	0	0.6	5.2	45.6	96.5	92.5	1.5	1.6	0	0	43	1
13	2	28	16	0.9	0.6	7.3	40.3	82.9	92.1	1.3	1.2	0	0	43	1
14	1	18	10	0	0	2.2	36.2	102.2	86.4	1.2	1.8	0	0	43	1
15	2	30	12	2.6	4.2	3.3	31.2	94	89.7	1.2	2.5	4.5	0	43	1
16	2	27	10	0.7	2.8	4.8	40.6	102.8	89.4	0.6	0.8	8.9	8	43	1
17	2	28	13	0.7	0.5	2.8	28.9	101.8	99.4	1.3	1.5	0	0	43	1
18	2	28	10	3.7	1.8	5.5	46.7	101.2	96.7	2.2	3.2	2.3	0	43	1
19	2	26	9.5	0	2.2	5.4	30	87.2	86.1	0.9	1.3	2.7	3.1	43	1
20	2	23	11	0.6	2.6	5.2	44.5	102.2	95	11.6	2.7	0	0	43	1
21	2	33	13	0.5	0.3	3.8	31.5	92.8	98.6	0.8	2	0	2.7	43	1
22	1	26	16	0.9	3.5	4	33.8	100.7	98.8	2.8	2	0	0	43	1
23	2	21	14	0.8	1.4	7.5	33.4	102.9	114	1.6	1.9	0	0	43	1
24	2	24	14	2.4	3	2.9	30.1	112.1	92.8	7.8	8.2	0	0	43	1
25	2	23	11	0.8	0.3	2.3	37.8	101.5	92.6	1.3	1.1	3.5	0	43	1
26	1	19	10	0.5	0.5	1.7	23.4	112.4	96.3	1.5	2	0	0	43	1
27	2	33	13	1.1	0.6	5.2	23.6	108.2	104.4	2.6	2.3	0	0	43	1
28	2	22	13	0	0	2.9	40.9	108.8	93.1	1.7	2.5	0	0	43	1
29	2	37	10	0	0.4	3.7	29.4	118.4	101	6.9	5.4	0	0	43	1
30	1	22	9.5	0	0.9	5.9	36.2	104.8	108.6	1.3	8.7	2.9	7.3	43	1
1	2	23	9	0	0	4	42	89.5	92.6	1.9	1.6	0	0	11	2
2	1	28	11	1.1	3.7	1.5	22	114.7	90.1	1.8	2	0	0	11	2
3	2	30	15	3.4	1.3	7.3	30.1	57.9	81.4	1.9	1.2	0	0	11	2
4	2	22	13	1.7	1	3.8	17.4	87.3	105.6	1.6	1	0	0	11	2
5	2	32	15	3.8	4.4	7.8	40.1	88	98.4	1.9	4.4	0	0	11	2
6	2	28	9	0.8	3	1.5	34.6	117.5	91.9	1.5	1.2	0	0	11	2
7	2	25	14	1.6	3.4	3.3	23.5	102.1	88.7	1.6	0.9	0	0	11	2
8	2	27	9.5	4.5	2.5	5.3	39.4	97.9	94.4	1.5	2.1	0	0	11	2
9	2	28	8.5	2.9	5.7	7.3	45.2	101.7	92	0.8	2.5	0	0	11	2
10	2	28	11	1.4	4.4	5.8	26.5	114.5	106.5	1.3	1.5	0	0	11	2
11	2	20	8	2.6	4.3	4.7	43	100.6	91.8	1.8	1.4	0	0	11	2
12	2	25	13	0	0.6	5.2	45.6	96.5	92.5	1.2	1	0	0	11	2
13	2	28	16	0.9	0.6	7.3	40.3	82.9	92.1	1.8	2	0	0	11	2
14	1	18	10	0	0	2.2	36.2	102.2	86.4	1.9	1.2	0	0	11	2
15	2	30	12	2.6	4.2	3.3	31.2	94	89.7	1.3	1.8	0	0	11	2
16	2	27	10	0.7	2.8	4.8	40.6	102.8	89.4	1.5	1.3	0	0	11	2
17	2	28	13	0.7	0.5	2.8	28.9	101.8	99.4	1.5	1.8	0	0	11	2
18	2	28	10	3.7	1.8	5.5	46.7	101.2	96.7	1.3	1.9	0	0	11	2
19	2	26	9.5	0	2.2	5.4	30	87.2	86.1	0.4	1.3	0	0	11	2
20	2	23	11	0.6	2.6	5.2	44.5	102.2	95	1.7	3.1	0	0	11	2
21	2	33	13	0.5	0.3	3.8	31.5	92.8	98.6	1.9	1.5	0	0	11	2
22	1	26	16	0.9	3.5	4	33.8	100.7	98.8	1.4	2	0	0	11	2
23	2	21	14	0.8	1.4	7.5	33.4	102.9	114	1.4	2.3	0	0	11	2
24	2	24	14	2.4	3	2.9	30.1	112.1	92.8	1.5	1.9	0	0	11	2
25	2	23	11	0.8	0.3	2.3	37.8	101.5	92.6	1.3	2.1	0	0	11	2
26	1	19	10	0.5	0.5	1.7	23.4	112.4	96.3	1.4	1.1	0	0	11	2
27	2	33	13	1.1	0.6	5.2	23.6	108.2	104.4	1.5	1.2	0	0	11	2
28	2	22	13	0	0	2.9	40.9	108.8	93.1	1.6	1.6	0	0	11	2
29	2	37	10	0	0.4	3.7	29.4	118.4	101	1.4	3.6	0	0	11	2
30	1	22	9.5	0	0.9	5.9	36.2	104.8	108.6	1	1.2	0	0	11	2
1	2	23	9	0	0	4	42	89.5	92.6	1.4	0.9	0	0	12	2
2	1	28	11	1.1	3.7	1.5	22	114.7	90.1	1.6	2	0	0	12	2
3	2	30	15	3.4	1.3	7.3	30.1	57.9	81.4	2.2	4.4	0	0	12	2
4	2	22	13	1.7	1	3.8	17.4	87.3	105.6	1.2	1.4	0	0	12	2
5	2	32	15	3.8	4.4	7.8	40.1	88	98.4	2	8	0	0	12	2
6	2	28	9	0.8	3	1.5	34.6	117.5	91.9	1.3	1.1	0	0	12	2
7	2	25	14	1.6	3.4	3.3	23.5	102.1	88.7	1.4	4.3	0	0	12	2
8	2	27	9.5	4.5	2.5	5.3	39.4	97.9	94.4	2	2.8	0	0	12	2
9	2	28	8.5	2.9	5.7	7.3	45.2	101.7	92	1.1	2.1	0	0	12	2
10	2	28	11	1.4	4.4	5.8	26.5	114.5	106.5	1.4	1.3	0	0	12	2
11	2	20	8	2.6	4.3	4.7	43	100.6	91.8	1.3	1.4	0	0	12	2
12	2	25	13	0	0.6	5.2	45.6	96.5	92.5	1.5	1.6	0	0	12	2
13	2	28	16	0.9	0.6	7.3	40.3	82.9	92.1	1.9	2	0	0	12	2
14	1	18	10	0	0	2.2	36.2	102.2	86.4	0	0.7	0	0	12	2
15	2	30	12	2.6	4.2	3.3	31.2	94	89.7	1.1	2.5	0	0	12	2
16	2	27	10	0.7	2.8	4.8	40.6	102.8	89.4	1	0	0	0	12	2
17	2	28	13	0.7	0.5	2.8	28.9	101.8	99.4	1.1	2.5	0	0	12	2
18	2	28	10	3.7	1.8	5.5	46.7	101.2	96.7	1.7	2.7	0	0	12	2
19	2	26	9.5	0	2.2	5.4	30	87.2	86.1	0.9	1.3	0	0	12	2
20	2	23	11	0.6	2.6	5.2	44.5	102.2	95	1.3	2.6	0	0	12	2
21	2	33	13	0.5	0.3	3.8	31.5	92.8	98.6	1.7	0.9	0	0	12	2
22	1	26	16	0.9	3.5	4	33.8	100.7	98.8	1.6	1.4	0	0	12	2
23	2	21	14	0.8	1.4	7.5	33.4	102.9	114	0.8	1.9	0	0	12	2
24	2	24	14	2.4	3	2.9	30.1	112.1	92.8	1.4	1.8	0	0	12	2
25	2	23	11	0.8	0.3	2.3	37.8	101.5	92.6	0.5	2.5	0	0	12	2
26	1	19	10	0.5	0.5	1.7	23.4	112.4	96.3	1.2	1.9	0	0	12	2
27	2	33	13	1.1	0.6	5.2	23.6	108.2	104.4	1.6	2.1	0	0	12	2
28	2	22	13	0	0	2.9	40.9	108.8	93.1	1.1	1.1	0	0	12	2
29	2	37	10	0	0.4	3.7	29.4	118.4	101	3.7	7.4	0	0	12	2
30	1	22	9.5	0	0.9	5.9	36.2	104.8	108.6	1.3	1.5	0	0	12	2
1	2	23	9	0	0	4	42	89.5	92.6	1.8	1.3	0	0	13	2
2	1	28	11	1.1	3.7	1.5	22	114.7	90.1	1.6	1.9	0	0	13	2
3	2	30	15	3.4	1.3	7.3	30.1	57.9	81.4	3.2	1.6	0	0	13	2
4	2	22	13	1.7	1	3.8	17.4	87.3	105.6	2	2.1	0	0	13	2
5	2	32	15	3.8	4.4	7.8	40.1	88	98.4	2.1	4.6	0	0	13	2
6	2	28	9	0.8	3	1.5	34.6	117.5	91.9	1.3	2	0	0	13	2
7	2	25	14	1.6	3.4	3.3	23.5	102.1	88.7	1.6	1.9	0	0	13	2
8	2	27	9.5	4.5	2.5	5.3	39.4	97.9	94.4	1.6	1.6	0	0	13	2
9	2	28	8.5	2.9	5.7	7.3	45.2	101.7	92	2.8	2.6	0	0	13	2
10	2	28	11	1.4	4.4	5.8	26.5	114.5	106.5	1.8	1.1	0	0	13	2
11	2	20	8	2.6	4.3	4.7	43	100.6	91.8	1.4	4.5	0	0	13	2
12	2	25	13	0	0.6	5.2	45.6	96.5	92.5	1.6	2.1	0	0	13	2
13	2	28	16	0.9	0.6	7.3	40.3	82.9	92.1	1.6	2	0	0	13	2
14	1	18	10	0	0	2.2	36.2	102.2	86.4	0	0	0	0	13	2
15	2	30	12	2.6	4.2	3.3	31.2	94	89.7	1.5	2.3	0	0	13	2
16	2	27	10	0.7	2.8	4.8	40.6	102.8	89.4	1.9	1.8	0	0	13	2
17	2	28	13	0.7	0.5	2.8	28.9	101.8	99.4	1.9	2.4	0	0	13	2
18	2	28	10	3.7	1.8	5.5	46.7	101.2	96.7	1.4	3.8	0	0	13	2
19	2	26	9.5	0	2.2	5.4	30	87.2	86.1	0.8	1.4	0	0	13	2
20	2	23	11	0.6	2.6	5.2	44.5	102.2	95	2.7	2.1	0	0	13	2
21	2	33	13	0.5	0.3	3.8	31.5	92.8	98.6	2.3	2.4	0	0	13	2
22	1	26	16	0.9	3.5	4	33.8	100.7	98.8	1.5	2.7	0	0	13	2
23	2	21	14	0.8	1.4	7.5	33.4	102.9	114	1	1.2	0	2.2	13	2
24	2	24	14	2.4	3	2.9	30.1	112.1	92.8	2.1	2	0	0	13	2
25	2	23	11	0.8	0.3	2.3	37.8	101.5	92.6	0	2.2	0	0	13	2
26	1	19	10	0.5	0.5	1.7	23.4	112.4	96.3	2.7	1.4	0	0	13	2
27	2	33	13	1.1	0.6	5.2	23.6	108.2	104.4	1.6	2.1	0	0	13	2
28	2	22	13	0	0	2.9	40.9	108.8	93.1	2	1.9	0	0	13	2
29	2	37	10	0	0.4	3.7	29.4	118.4	101	4.1	5.1	0	0	13	2
30	1	22	9.5	0	0.9	5.9	36.2	104.8	108.6	1.8	1	0	0	13	2
1	2	23	9	0	0	4	42	89.5	92.6	1.9	1.6	0	0	21	2
2	1	28	11	1.1	3.7	1.5	22	114.7	90.1	1.2	1.4	0	0	21	2
3	2	30	15	3.4	1.3	7.3	30.1	57.9	81.4	2.2	0.9	0	0	21	2
4	2	22	13	1.7	1	3.8	17.4	87.3	105.6	1.7	1.5	0	0	21	2
5	2	32	15	3.8	4.4	7.8	40.1	88	98.4	1.5	6.8	0	0	21	2
6	2	28	9	0.8	3	1.5	34.6	117.5	91.9	2.2	1.8	0	0	21	2
7	2	25	14	1.6	3.4	3.3	23.5	102.1	88.7	1.9	3.7	0	0	21	2
8	2	27	9.5	4.5	2.5	5.3	39.4	97.9	94.4	1.8	1.6	0	0	21	2
9	2	28	8.5	2.9	5.7	7.3	45.2	101.7	92	1.8	1.9	0	0	21	2
10	2	28	11	1.4	4.4	5.8	26.5	114.5	106.5	1.8	1.2	0	0	21	2
11	2	20	8	2.6	4.3	4.7	43	100.6	91.8	1.3	1.3	0	0	21	2
12	2	25	13	0	0.6	5.2	45.6	96.5	92.5	1.8	2.3	0	0	21	2
13	2	28	16	0.9	0.6	7.3	40.3	82.9	92.1	1.7	1.5	0	0	21	2
14	1	18	10	0	0	2.2	36.2	102.2	86.4	0	0.9	0	0	21	2
15	2	30	12	2.6	4.2	3.3	31.2	94	89.7	1.4	1.9	0	0	21	2
16	2	27	10	0.7	2.8	4.8	40.6	102.8	89.4	1.3	1.9	0	0	21	2
17	2	28	13	0.7	0.5	2.8	28.9	101.8	99.4	1.2	1.6	0	0	21	2
18	2	28	10	3.7	1.8	5.5	46.7	101.2	96.7	1.4	1.6	0	0	21	2
19	2	26	9.5	0	2.2	5.4	30	87.2	86.1	0.7	0.4	0	0	21	2
20	2	23	11	0.6	2.6	5.2	44.5	102.2	95	2.6	2.3	0	0	21	2
21	2	33	13	0.5	0.3	3.8	31.5	92.8	98.6	1.6	2	0	0	21	2
22	1	26	16	0.9	3.5	4	33.8	100.7	98.8	1.3	2.9	0	0	21	2
23	2	21	14	0.8	1.4	7.5	33.4	102.9	114	1.9	2.6	0	0	21	2
24	2	24	14	2.4	3	2.9	30.1	112.1	92.8	1.5	1.4	0	0	21	2
25	2	23	11	0.8	0.3	2.3	37.8	101.5	92.6	1.5	1.5	0	0	21	2
26	1	19	10	0.5	0.5	1.7	23.4	112.4	96.3	1.3	1.7	0	0	21	2
27	2	33	13	1.1	0.6	5.2	23.6	108.2	104.4	1.2	1.9	0	0	21	2
28	2	22	13	0	0	2.9	40.9	108.8	93.1	1.6	1.6	0	0	21	2
29	2	37	10	0	0.4	3.7	29.4	118.4	101	1.9	4	0	0	21	2
30	1	22	9.5	0	0.9	5.9	36.2	104.8	108.6	0.8	1.1	0	0	21	2
1	2	23	9	0	0	4	42	89.5	92.6	1.4	1.5	0	0	22	2
2	1	28	11	1.1	3.7	1.5	22	114.7	90.1	1.6	1.7	0	0	22	2
3	2	30	15	3.4	1.3	7.3	30.1	57.9	81.4	1.7	1	0	0	22	2
4	2	22	13	1.7	1	3.8	17.4	87.3	105.6	3.2	3.4	0	0	22	2
5	2	32	15	3.8	4.4	7.8	40.1	88	98.4	5.4	5.7	0	0	22	2
6	2	28	9	0.8	3	1.5	34.6	117.5	91.9	1	1.8	0	0	22	2
7	2	25	14	1.6	3.4	3.3	23.5	102.1	88.7	1.1	1.3	0	0	22	2
8	2	27	9.5	4.5	2.5	5.3	39.4	97.9	94.4	1.7	3	0	0	22	2
9	2	28	8.5	2.9	5.7	7.3	45.2	101.7	92	1.6	1.2	0	0	22	2
10	2	28	11	1.4	4.4	5.8	26.5	114.5	106.5	1.2	1.7	0	0	22	2
11	2	20	8	2.6	4.3	4.7	43	100.6	91.8	1.3	3.3	0	0	22	2
12	2	25	13	0	0.6	5.2	45.6	96.5	92.5	1.9	2.1	0	0	22	2
13	2	28	16	0.9	0.6	7.3	40.3	82.9	92.1	1.8	1.7	0	0	22	2
14	1	18	10	0	0	2.2	36.2	102.2	86.4	0	0.7	0	0	22	2
15	2	30	12	2.6	4.2	3.3	31.2	94	89.7	2	3.1	0	0	22	2
16	2	27	10	0.7	2.8	4.8	40.6	102.8	89.4	1.2	2.2	0	0	22	2
17	2	28	13	0.7	0.5	2.8	28.9	101.8	99.4	0.8	1.8	0	0	22	2
18	2	28	10	3.7	1.8	5.5	46.7	101.2	96.7	1.5	1.7	0	0	22	2
19	2	26	9.5	0	2.2	5.4	30	87.2	86.1	0.7	1.4	0	0	22	2
20	2	23	11	0.6	2.6	5.2	44.5	102.2	95	1.8	2.3	0	0	22	2
21	2	33	13	0.5	0.3	3.8	31.5	92.8	98.6	1.6	2.1	0	0	22	2
22	1	26	16	0.9	3.5	4	33.8	100.7	98.8	2.1	1.6	0	0	22	2
23	2	21	14	0.8	1.4	7.5	33.4	102.9	114	1	1.6	0	0	22	2
24	2	24	14	2.4	3	2.9	30.1	112.1	92.8	2.6	2.3	0	0	22	2
25	2	23	11	0.8	0.3	2.3	37.8	101.5	92.6	1.6	6.1	0	0	22	2
26	1	19	10	0.5	0.5	1.7	23.4	112.4	96.3	1.5	0.7	0	0	22	2
27	2	33	13	1.1	0.6	5.2	23.6	108.2	104.4	1.7	1.8	0	0	22	2
28	2	22	13	0	0	2.9	40.9	108.8	93.1	1.1	1.5	0	0	22	2
29	2	37	10	0	0.4	3.7	29.4	118.4	101	1.8	6.5	0	0	22	2
30	1	22	9.5	0	0.9	5.9	36.2	104.8	108.6	0.9	1.7	0	0	22	2
1	2	23	9	0	0	4	42	89.5	92.6	1.5	1.1	0	0	23	2
2	1	28	11	1.1	3.7	1.5	22	114.7	90.1	1.4	2.3	0	0	23	2
3	2	30	15	3.4	1.3	7.3	30.1	57.9	81.4	1.7	1.5	0	0	23	2
4	2	22	13	1.7	1	3.8	17.4	87.3	105.6	2	2.6	0	0	23	2
5	2	32	15	3.8	4.4	7.8	40.1	88	98.4	3.7	4.8	0	0	23	2
6	2	28	9	0.8	3	1.5	34.6	117.5	91.9	1.1	1.6	0	0	23	2
7	2	25	14	1.6	3.4	3.3	23.5	102.1	88.7	1.7	3.8	0	0	23	2
8	2	27	9.5	4.5	2.5	5.3	39.4	97.9	94.4	1.6	3.2	0	0	23	2
9	2	28	8.5	2.9	5.7	7.3	45.2	101.7	92	3.1	3.3	0	0	23	2
10	2	28	11	1.4	4.4	5.8	26.5	114.5	106.5	1.5	1.9	0	0	23	2
11	2	20	8	2.6	4.3	4.7	43	100.6	91.8	3.2	3	0	0	23	2
12	2	25	13	0	0.6	5.2	45.6	96.5	92.5	1.7	1.6	0	0	23	2
13	2	28	16	0.9	0.6	7.3	40.3	82.9	92.1	1.7	1.6	0	0	23	2
14	1	18	10	0	0	2.2	36.2	102.2	86.4	0	1.3	0	0	23	2
15	2	30	12	2.6	4.2	3.3	31.2	94	89.7	1.6	2.4	0	0	23	2
16	2	27	10	0.7	2.8	4.8	40.6	102.8	89.4	2.1	3	0	0	23	2
17	2	28	13	0.7	0.5	2.8	28.9	101.8	99.4	1.9	2.2	0	0	23	2
18	2	28	10	3.7	1.8	5.5	46.7	101.2	96.7	1.9	3.1	0	0	23	2
19	2	26	9.5	0	2.2	5.4	30	87.2	86.1	1.1	0.7	0	0	23	2
20	2	23	11	0.6	2.6	5.2	44.5	102.2	95	1.2	3.1	0	0	23	2
21	2	33	13	0.5	0.3	3.8	31.5	92.8	98.6	3.5	3.1	0	0	23	2
22	1	26	16	0.9	3.5	4	33.8	100.7	98.8	1.8	3.4	0	0	23	2
23	2	21	14	0.8	1.4	7.5	33.4	102.9	114	1.7	1.4	0	0	23	2
24	2	24	14	2.4	3	2.9	30.1	112.1	92.8	1	1.5	0	0	23	2
25	2	23	11	0.8	0.3	2.3	37.8	101.5	92.6	0	1.7	0	0	23	2
26	1	19	10	0.5	0.5	1.7	23.4	112.4	96.3	1.7	1.2	0	0	23	2
27	2	33	13	1.1	0.6	5.2	23.6	108.2	104.4	1.7	2.7	0	0	23	2
28	2	22	13	0	0	2.9	40.9	108.8	93.1	3.2	3.3	0	0	23	2
29	2	37	10	0	0.4	3.7	29.4	118.4	101	2.4	6.8	0	0	23	2
30	1	22	9.5	0	0.9	5.9	36.2	104.8	108.6	1.1	1.7	0	0	23	2
1	2	23	9	0	0	4	42	89.5	92.6	1.9	8.7	0	0	31	2
2	1	28	11	1.1	3.7	1.5	22	114.7	90.1	1	1.4	0	0	31	2
3	2	30	15	3.4	1.3	7.3	30.1	57.9	81.4	4	2.9	0	0	31	2
4	2	22	13	1.7	1	3.8	17.4	87.3	105.6	3.1	4.5	0	0	31	2
5	2	32	15	3.8	4.4	7.8	40.1	88	98.4	6.7	3	0	0	31	2
6	2	28	9	0.8	3	1.5	34.6	117.5	91.9	1.6	2.5	0	0	31	2
7	2	25	14	1.6	3.4	3.3	23.5	102.1	88.7	1.8	2.1	0	0	31	2
8	2	27	9.5	4.5	2.5	5.3	39.4	97.9	94.4	2.6	2.4	0	0	31	2
9	2	28	8.5	2.9	5.7	7.3	45.2	101.7	92	2.6	3.1	0	0	31	2
10	2	28	11	1.4	4.4	5.8	26.5	114.5	106.5	2	1.3	0	0	31	2
11	2	20	8	2.6	4.3	4.7	43	100.6	91.8	1	1.9	0	0	31	2
12	2	25	13	0	0.6	5.2	45.6	96.5	92.5	2	3	0	0	31	2
13	2	28	16	0.9	0.6	7.3	40.3	82.9	92.1	2.2	2.3	0	0	31	2
14	1	18	10	0	0	2.2	36.2	102.2	86.4	1.5	1.8	0	0	31	2
15	2	30	12	2.6	4.2	3.3	31.2	94	89.7	2.7	1.5	0	0	31	2
16	2	27	10	0.7	2.8	4.8	40.6	102.8	89.4	1.8	1.2	0	0	31	2
17	2	28	13	0.7	0.5	2.8	28.9	101.8	99.4	2.8	2.3	0	0	31	2
18	2	28	10	3.7	1.8	5.5	46.7	101.2	96.7	2.6	2.8	0	0	31	2
19	2	26	9.5	0	2.2	5.4	30	87.2	86.1	1.3	2	0	0	31	2
20	2	23	11	0.6	2.6	5.2	44.5	102.2	95	2.2	3.2	0	0	31	2
21	2	33	13	0.5	0.3	3.8	31.5	92.8	98.6	1.7	1.6	0	0	31	2
22	1	26	16	0.9	3.5	4	33.8	100.7	98.8	2.4	3.3	0	0	31	2
23	2	21	14	0.8	1.4	7.5	33.4	102.9	114	2.5	2.5	0	0	31	2
24	2	24	14	2.4	3	2.9	30.1	112.1	92.8	2.3	1.8	0	0	31	2
25	2	23	11	0.8	0.3	2.3	37.8	101.5	92.6	1	1.2	0	0	31	2
26	1	19	10	0.5	0.5	1.7	23.4	112.4	96.3	1.7	2.2	0	0	31	2
27	2	33	13	1.1	0.6	5.2	23.6	108.2	104.4	3.1	1.9	0	0	31	2
28	2	22	13	0	0	2.9	40.9	108.8	93.1	2.1	1.4	0	0	31	2
29	2	37	10	0	0.4	3.7	29.4	118.4	101	1.8	5.5	0	0	31	2
30	1	22	9.5	0	0.9	5.9	36.2	104.8	108.6	1.3	1.2	0	0	31	2
1	2	23	9	0	0	4	42	89.5	92.6	1.9	2	0	0	32	2
2	1	28	11	1.1	3.7	1.5	22	114.7	90.1	1.5	1.8	0	0	32	2
3	2	30	15	3.4	1.3	7.3	30.1	57.9	81.4	1.4	1.6	0	0	32	2
4	2	22	13	1.7	1	3.8	17.4	87.3	105.6	3.1	4	0	0	32	2
5	2	32	15	3.8	4.4	7.8	40.1	88	98.4	7.2	3	0	0	32	2
6	2	28	9	0.8	3	1.5	34.6	117.5	91.9	3.3	1.4	0	0	32	2
7	2	25	14	1.6	3.4	3.3	23.5	102.1	88.7	1.7	2	0	0	32	2
8	2	27	9.5	4.5	2.5	5.3	39.4	97.9	94.4	1.4	1.4	0	0	32	2
9	2	28	8.5	2.9	5.7	7.3	45.2	101.7	92	3.3	2.9	0	0	32	2
10	2	28	11	1.4	4.4	5.8	26.5	114.5	106.5	3	1.8	0	0	32	2
11	2	20	8	2.6	4.3	4.7	43	100.6	91.8	1.4	2	0	0	32	2
12	2	25	13	0	0.6	5.2	45.6	96.5	92.5	1.7	2.3	0	0	32	2
13	2	28	16	0.9	0.6	7.3	40.3	82.9	92.1	2.9	1.7	0	0	32	2
14	1	18	10	0	0	2.2	36.2	102.2	86.4	1.8	2.3	0	0	32	2
15	2	30	12	2.6	4.2	3.3	31.2	94	89.7	2.3	2.2	0	0	32	2
16	2	27	10	0.7	2.8	4.8	40.6	102.8	89.4	2.2	1.7	0	0	32	2
17	2	28	13	0.7	0.5	2.8	28.9	101.8	99.4	1.7	1.7	0	0	32	2
18	2	28	10	3.7	1.8	5.5	46.7	101.2	96.7	3.1	2.6	0	0	32	2
19	2	26	9.5	0	2.2	5.4	30	87.2	86.1	1.7	1.7	0	0	32	2
20	2	23	11	0.6	2.6	5.2	44.5	102.2	95	3.8	3.6	0	0	32	2
21	2	33	13	0.5	0.3	3.8	31.5	92.8	98.6	0.6	1.6	0	0	32	2
22	1	26	16	0.9	3.5	4	33.8	100.7	98.8	2.5	2.7	0	0	32	2
23	2	21	14	0.8	1.4	7.5	33.4	102.9	114	1.9	2.7	0	0	32	2
24	2	24	14	2.4	3	2.9	30.1	112.1	92.8	1.7	1.5	0	0	32	2
25	2	23	11	0.8	0.3	2.3	37.8	101.5	92.6	1.6	1.6	0	0	32	2
26	1	19	10	0.5	0.5	1.7	23.4	112.4	96.3	1.9	1.1	0	0	32	2
27	2	33	13	1.1	0.6	5.2	23.6	108.2	104.4	3.2	1.5	0	0	32	2
28	2	22	13	0	0	2.9	40.9	108.8	93.1	2.3	2.6	0	0	32	2
29	2	37	10	0	0.4	3.7	29.4	118.4	101	1.8	6.1	0	0	32	2
30	1	22	9.5	0	0.9	5.9	36.2	104.8	108.6	1.2	1.3	0	0	32	2
1	2	23	9	0	0	4	42	89.5	92.6	1.8	1.7	0	0	33	2
2	1	28	11	1.1	3.7	1.5	22	114.7	90.1	2	2.4	0	0	33	2
3	2	30	15	3.4	1.3	7.3	30.1	57.9	81.4	1.8	1.5	0	0	33	2
4	2	22	13	1.7	1	3.8	17.4	87.3	105.6	2.8	3.4	0	0	33	2
5	2	32	15	3.8	4.4	7.8	40.1	88	98.4	1.7	2	0	0	33	2
6	2	28	9	0.8	3	1.5	34.6	117.5	91.9	2.2	1.5	0	0	33	2
7	2	25	14	1.6	3.4	3.3	23.5	102.1	88.7	2.3	2.3	0	0	33	2
8	2	27	9.5	4.5	2.5	5.3	39.4	97.9	94.4	1.6	2.8	0	0	33	2
9	2	28	8.5	2.9	5.7	7.3	45.2	101.7	92	2.7	2.4	0	0	33	2
10	2	28	11	1.4	4.4	5.8	26.5	114.5	106.5	2.8	2.4	0	0	33	2
11	2	20	8	2.6	4.3	4.7	43	100.6	91.8	1.8	2.9	0	0	33	2
12	2	25	13	0	0.6	5.2	45.6	96.5	92.5	1.8	2.1	0	0	33	2
13	2	28	16	0.9	0.6	7.3	40.3	82.9	92.1	1.7	2.5	0	0	33	2
14	1	18	10	0	0	2.2	36.2	102.2	86.4	0.8	1.5	0	0	33	2
15	2	30	12	2.6	4.2	3.3	31.2	94	89.7	1.7	1.7	0	0	33	2
16	2	27	10	0.7	2.8	4.8	40.6	102.8	89.4	1.8	2.1	0	0	33	2
17	2	28	13	0.7	0.5	2.8	28.9	101.8	99.4	2	2.4	0	0	33	2
18	2	28	10	3.7	1.8	5.5	46.7	101.2	96.7	1.3	2.2	0	0	33	2
19	2	26	9.5	0	2.2	5.4	30	87.2	86.1	1.8	2	0	0	33	2
20	2	23	11	0.6	2.6	5.2	44.5	102.2	95	3.4	2.7	0	0	33	2
21	2	33	13	0.5	0.3	3.8	31.5	92.8	98.6	1	1.4	0	0	33	2
22	1	26	16	0.9	3.5	4	33.8	100.7	98.8	2.4	2.9	0	0	33	2
23	2	21	14	0.8	1.4	7.5	33.4	102.9	114	2.6	2.7	0	0	33	2
24	2	24	14	2.4	3	2.9	30.1	112.1	92.8	1.8	2.9	0	0	33	2
25	2	23	11	0.8	0.3	2.3	37.8	101.5	92.6	1.2	1.4	0	0	33	2
26	1	19	10	0.5	0.5	1.7	23.4	112.4	96.3	1.7	2.2	0	0	33	2
27	2	33	13	1.1	0.6	5.2	23.6	108.2	104.4	1.8	2.7	0	0	33	2
28	2	22	13	0	0	2.9	40.9	108.8	93.1	1.8	1.8	0	0	33	2
29	2	37	10	0	0.4	3.7	29.4	118.4	101	2.4	3.7	0	0	33	2
30	1	22	9.5	0	0.9	5.9	36.2	104.8	108.6	1.8	1.3	0	0	33	2
1	2	23	9	0	0	4	42	89.5	92.6	1.6	1.8	0	0	41	2
2	1	28	11	1.1	3.7	1.5	22	114.7	90.1	1.7	2.2	0	0	41	2
3	2	30	15	3.4	1.3	7.3	30.1	57.9	81.4	3.1	3.4	0	0	41	2
4	2	22	13	1.7	1	3.8	17.4	87.3	105.6	3.3	3.5	0	0	41	2
5	2	32	15	3.8	4.4	7.8	40.1	88	98.4	1.9	3.1	0	0	41	2
6	2	28	9	0.8	3	1.5	34.6	117.5	91.9	2.4	2.3	0	0	41	2
7	2	25	14	1.6	3.4	3.3	23.5	102.1	88.7	1.5	2.8	0	0	41	2
8	2	27	9.5	4.5	2.5	5.3	39.4	97.9	94.4	3.1	7.4	0	0	41	2
9	2	28	8.5	2.9	5.7	7.3	45.2	101.7	92	1.5	3.6	0	0	41	2
10	2	28	11	1.4	4.4	5.8	26.5	114.5	106.5	2.2	2.2	0	0	41	2
11	2	20	8	2.6	4.3	4.7	43	100.6	91.8	1.6	1.3	0	0	41	2
12	2	25	13	0	0.6	5.2	45.6	96.5	92.5	2.1	2.3	0	0	41	2
13	2	28	16	0.9	0.6	7.3	40.3	82.9	92.1	2.2	2.1	0	0	41	2
14	1	18	10	0	0	2.2	36.2	102.2	86.4	1.4	1.5	0	0	41	2
15	2	30	12	2.6	4.2	3.3	31.2	94	89.7	4.6	1.7	0	0	41	2
16	2	27	10	0.7	2.8	4.8	40.6	102.8	89.4	1.9	2.1	0	0	41	2
17	2	28	13	0.7	0.5	2.8	28.9	101.8	99.4	2.6	2.9	0	0	41	2
18	2	28	10	3.7	1.8	5.5	46.7	101.2	96.7	2.9	1.7	0	0	41	2
19	2	26	9.5	0	2.2	5.4	30	87.2	86.1	1.6	1.4	0	0	41	2
20	2	23	11	0.6	2.6	5.2	44.5	102.2	95	4.1	2.3	0	0	41	2
21	2	33	13	0.5	0.3	3.8	31.5	92.8	98.6	1.1	1.9	0	0	41	2
22	1	26	16	0.9	3.5	4	33.8	100.7	98.8	2.9	2.7	0	0	41	2
23	2	21	14	0.8	1.4	7.5	33.4	102.9	114	2.5	2	0	0	41	2
24	2	24	14	2.4	3	2.9	30.1	112.1	92.8	2.7	1.8	0	0	41	2
25	2	23	11	0.8	0.3	2.3	37.8	101.5	92.6	0.9	1.4	0	0	41	2
26	1	19	10	0.5	0.5	1.7	23.4	112.4	96.3	1.8	2.1	0	0	41	2
27	2	33	13	1.1	0.6	5.2	23.6	108.2	104.4	2.8	1.7	0	0	41	2
28	2	22	13	0	0	2.9	40.9	108.8	93.1	1.8	1.8	0	0	41	2
29	2	37	10	0	0.4	3.7	29.4	118.4	101	2.4	7.5	0	0	41	2
30	1	22	9.5	0	0.9	5.9	36.2	104.8	108.6	1.8	1.6	0	0	41	2
1	2	23	9	0	0	4	42	89.5	92.6	1.5	1.8	4.6	0	42	2
2	1	28	11	1.1	3.7	1.5	22	114.7	90.1	2	1.5	0	0	42	2
3	2	30	15	3.4	1.3	7.3	30.1	57.9	81.4	2.4	1.4	0	0	42	2
4	2	22	13	1.7	1	3.8	17.4	87.3	105.6	3.2	3.4	0	0	42	2
5	2	32	15	3.8	4.4	7.8	40.1	88	98.4	4.7	4.2	0	0	42	2
6	2	28	9	0.8	3	1.5	34.6	117.5	91.9	2	2.1	0	0	42	2
7	2	25	14	1.6	3.4	3.3	23.5	102.1	88.7	2.1	2.6	0	0	42	2
8	2	27	9.5	4.5	2.5	5.3	39.4	97.9	94.4	1.4	2.9	0	0	42	2
9	2	28	8.5	2.9	5.7	7.3	45.2	101.7	92	3.4	12	0	0	42	2
10	2	28	11	1.4	4.4	5.8	26.5	114.5	106.5	2.5	2	0	0	42	2
11	2	20	8	2.6	4.3	4.7	43	100.6	91.8	1.6	2.1	0	0	42	2
12	2	25	13	0	0.6	5.2	45.6	96.5	92.5	2.1	3.7	0	0	42	2
13	2	28	16	0.9	0.6	7.3	40.3	82.9	92.1	2.9	2.4	0	0	42	2
14	1	18	10	0	0	2.2	36.2	102.2	86.4	1.8	1.4	0	0	42	2
15	2	30	12	2.6	4.2	3.3	31.2	94	89.7	1.9	1.5	0	0	42	2
16	2	27	10	0.7	2.8	4.8	40.6	102.8	89.4	2.1	1.4	0	0	42	2
17	2	28	13	0.7	0.5	2.8	28.9	101.8	99.4	2.2	1.1	0	0	42	2
18	2	28	10	3.7	1.8	5.5	46.7	101.2	96.7	2.2	2.2	0	0	42	2
19	2	26	9.5	0	2.2	5.4	30	87.2	86.1	1.7	2	0	0	42	2
20	2	23	11	0.6	2.6	5.2	44.5	102.2	95	2.6	2.6	0	0	42	2
21	2	33	13	0.5	0.3	3.8	31.5	92.8	98.6	0.9	1.6	0	0	42	2
22	1	26	16	0.9	3.5	4	33.8	100.7	98.8	3.5	2	0	0	42	2
23	2	21	14	0.8	1.4	7.5	33.4	102.9	114	1.8	2.7	0	0	42	2
24	2	24	14	2.4	3	2.9	30.1	112.1	92.8	2.5	1.1	0	0	42	2
25	2	23	11	0.8	0.3	2.3	37.8	101.5	92.6	1.1	1.6	0	0	42	2
26	1	19	10	0.5	0.5	1.7	23.4	112.4	96.3	2	1.9	0	0	42	2
27	2	33	13	1.1	0.6	5.2	23.6	108.2	104.4	2.6	2	0	0	42	2
28	2	22	13	0	0	2.9	40.9	108.8	93.1	1.2	1.5	0	0	42	2
29	2	37	10	0	0.4	3.7	29.4	118.4	101	2.3	1.7	0	0	42	2
30	1	22	9.5	0	0.9	5.9	36.2	104.8	108.6	1.4	2.3	0	0	42	2
1	2	23	9	0	0	4	42	89.5	92.6	2.1	1.8	0	0	43	2
2	1	28	11	1.1	3.7	1.5	22	114.7	90.1	1.5	1.8	0	0	43	2
3	2	30	15	3.4	1.3	7.3	30.1	57.9	81.4	1.8	1.7	0	0	43	2
4	2	22	13	1.7	1	3.8	17.4	87.3	105.6	2.5	3.1	0	0	43	2
5	2	32	15	3.8	4.4	7.8	40.1	88	98.4	1.8	1.4	0	0	43	2
6	2	28	9	0.8	3	1.5	34.6	117.5	91.9	2.4	2.2	0	0	43	2
7	2	25	14	1.6	3.4	3.3	23.5	102.1	88.7	1.7	3.3	0	0	43	2
8	2	27	9.5	4.5	2.5	5.3	39.4	97.9	94.4	2.2	2.6	0	0	43	2
9	2	28	8.5	2.9	5.7	7.3	45.2	101.7	92	1.8	9.8	0	0	43	2
10	2	28	11	1.4	4.4	5.8	26.5	114.5	106.5	2.4	1.8	0	0	43	2
11	2	20	8	2.6	4.3	4.7	43	100.6	91.8	1.4	1.4	0	0	43	2
12	2	25	13	0	0.6	5.2	45.6	96.5	92.5	2.9	3.2	0	0	43	2
13	2	28	16	0.9	0.6	7.3	40.3	82.9	92.1	2.6	2.6	0	0	43	2
14	1	18	10	0	0	2.2	36.2	102.2	86.4	1.1	1.5	0	0	43	2
15	2	30	12	2.6	4.2	3.3	31.2	94	89.7	3.1	1.7	0	0	43	2
16	2	27	10	0.7	2.8	4.8	40.6	102.8	89.4	2	2.3	0	0	43	2
17	2	28	13	0.7	0.5	2.8	28.9	101.8	99.4	2.6	2.4	0	0	43	2
18	2	28	10	3.7	1.8	5.5	46.7	101.2	96.7	2	3.7	0	0	43	2
19	2	26	9.5	0	2.2	5.4	30	87.2	86.1	1.2	1.2	0	0	43	2
20	2	23	11	0.6	2.6	5.2	44.5	102.2	95	2	2.7	0	0	43	2
21	2	33	13	0.5	0.3	3.8	31.5	92.8	98.6	1.4	2.1	0	0	43	2
22	1	26	16	0.9	3.5	4	33.8	100.7	98.8	2.8	2.7	0	0	43	2
23	2	21	14	0.8	1.4	7.5	33.4	102.9	114	1.8	2.7	0	0	43	2
24	2	24	14	2.4	3	2.9	30.1	112.1	92.8	2.2	2	0	0	43	2
25	2	23	11	0.8	0.3	2.3	37.8	101.5	92.6	0.4	1.8	0	0	43	2
26	1	19	10	0.5	0.5	1.7	23.4	112.4	96.3	2.1	1.5	0	0	43	2
27	2	33	13	1.1	0.6	5.2	23.6	108.2	104.4	3.5	2.3	0	0	43	2
28	2	22	13	0	0	2.9	40.9	108.8	93.1	1.8	1.8	0	0	43	2
29	2	37	10	0	0.4	3.7	29.4	118.4	101	2.3	4.4	0	0	43	2
30	1	22	9.5	0	0.9	5.9	36.2	104.8	108.6	1.5	2.7	0	0	43	2

## Sheet: first evaluation of observer 2
Name	Tooth	labial/lingial	Crowding-maxilla-2	Crowding-mandible-2	ANB-2	MPSN-2	U1SN-2	L1MP-2	T0ABD-2	T1ABD-2	T0ABF-2	T1ABF-2
1	11	1	0	0	5.3	40.8	91.9	93.3	1.6	1.6	0	0
2	11	1	1.1	3.4	2.6	24	111.8	92.6	1.3	1.6	0	0
3	11	1	3.5	1.1	7.2	29.8	56.4	77.7	1.8	2.2	0	0
4	11	1	1.6	0.8	4.6	19.6	86.4	105.8	1.9	2.1	0	0
5	11	1	3.5	4.7	7.7	40.3	89	103.2	1.5	1.3	0	5.1
6	11	1	0.9	3.1	2	36.2	118.3	91.9	1.8	1.8	0	0
7	11	1	1.6	3.1	3	25.8	104.4	88	1.9	1.8	0	0
8	11	1	5	2.9	4.4	39.9	96.8	94.3	1.9	10.5	0	0
9	11	1	2.8	6	6.8	45.9	103	94	2.8	2.4	0	0
10	11	1	1.7	4.1	5.6	26	112.9	107	1.6	1.3	0	0
11	11	1	2.8	4.7	4.5	41.3	100.4	94.3	1.2	1.6	0	6.8
12	11	1	0	0.6	4.5	46.9	97.2	94.4	1.6	1.5	0	0
13	11	1	0.5	0.7	7.8	39.3	81.4	93	1.5	1.4	0	0
14	11	1	0	0	1.3	35.5	100	84.5	1.4	1.1	0	0
15	11	1	2.5	4.2	4.3	28.8	89.3	89.2	2.3	2.2	0	0
16	11	1	1	2.9	5.4	41.6	101.6	89.8	1.6	1.3	0	0
17	11	1	0.7	0.6	2	27.5	102.6	101.2	1.9	2	0	0
18	11	1	3.9	1.4	5.8	44.9	99.7	94.2	1.6	2.1	0	0
19	11	1	0	2.3	5.6	31.6	86.8	88.5	1.4	1.4	0	0
20	11	1	0.7	2.4	5.7	44.1	102	92.8	14.2	3.1	0	3.8
21	11	1	0.5	0.8	3.8	32.1	89.5	93.9	1.5	1.4	0	0
22	11	1	0.9	3.3	4.7	33.5	99.1	99.8	1.7	0.9	3	2
23	11	1	0.7	1.1	8.1	32.5	100	112.9	1.6	2.1	0	0
24	11	1	2.5	3	3.5	32.1	111.9	96.5	2.9	2.4	0	0
25	11	1	0.5	-0.2	1.7	39.1	101.2	94.3	1.1	1.3	0	0
26	11	1	0.1	0.9	1.5	24.5	108.9	97.2	1	1.6	0	0
27	11	1	1.1	0.3	5.9	24.8	108.7	104	2.5	2.2	0	0
28	11	1	0	0	3.1	41.5	110.5	95.7	1.7	1.1	0	0
29	11	1	0.3	0.9	3.7	29.1	122.1	100.5	1.2	1.6	0	0
30	11	1	0	0.8	5.9	35.1	107.5	110	1	2	4.8	9.3
1	12	1	0	0	5.3	40.8	91.9	93.3	2.3	0.8	2.1	2.1
2	12	1	1.1	3.4	2.6	24	111.8	92.6	1.4	1.8	2	2.1
3	12	1	3.5	1.1	7.2	29.8	56.4	77.7	1.3	1.7	0	0
4	12	1	1.6	0.8	4.6	19.6	86.4	105.8	2.6	3.2	5.5	0
5	12	1	3.5	4.7	7.7	40.3	89	103.2	12.3	10.3	0	0
6	12	1	0.9	3.1	2	36.2	118.3	91.9	2.2	2	0	0
7	12	1	1.6	3.1	3	25.8	104.4	88	1.3	1.6	4.1	3.3
8	12	1	5	2.9	4.4	39.9	96.8	94.3	12	10.4	0	2.7
9	12	1	2.8	6	6.8	45.9	103	94	2.7	2.1	6.8	6.9
10	12	1	1.7	4.1	5.6	26	112.9	107	1.2	1	0	0
11	12	1	2.8	4.7	4.5	41.3	100.4	94.3	1.3	1.8	0	0
12	12	1	0	0.6	4.5	46.9	97.2	94.4	3	2.2	6.7	5.4
13	12	1	0.5	0.7	7.8	39.3	81.4	93	2.7	2.8	0	2.3
14	12	1	0	0	1.3	35.5	100	84.5	0	1.9	0	0
15	12	1	2.5	4.2	4.3	28.8	89.3	89.2	1.5	2.8	0	4.3
16	12	1	1	2.9	5.4	41.6	101.6	89.8	0.9	1.8	2.1	6.9
17	12	1	0.7	0.6	2	27.5	102.6	101.2	1.5	2.1	0	2.3
18	12	1	3.9	1.4	5.8	44.9	99.7	94.2	1.5	1.7	4	3.4
19	12	1	0	2.3	5.6	31.6	86.8	88.5	1.5	1.8	5.3	0
20	12	1	0.7	2.4	5.7	44.1	102	92.8	3	6.7	0	0
21	12	1	0.5	0.8	3.8	32.1	89.5	93.9	10.9	11.9	0	0
22	12	1	0.9	3.3	4.7	33.5	99.1	99.8	1.5	2.9	0	2.3
23	12	1	0.7	1.1	8.1	32.5	100	112.9	2.1	1.9	0	0
24	12	1	2.5	3	3.5	32.1	111.9	96.5	3.3	3.9	0	2.5
25	12	1	0.5	-0.2	1.7	39.1	101.2	94.3	1.1	2.2	0	0
26	12	1	0.1	0.9	1.5	24.5	108.9	97.2	1.5	3.1	0	0
27	12	1	1.1	0.3	5.9	24.8	108.7	104	2.3	2.7	0	0
28	12	1	0	0	3.1	41.5	110.5	95.7	1.4	1.6	0	0
29	12	1	0.3	0.9	3.7	29.1	122.1	100.5	2.2	5.2	6.8	0
30	12	1	0	0.8	5.9	35.1	107.5	110	2.8	2.4	4	4.8
1	13	1	0	0	5.3	40.8	91.9	93.3	1.9	1.3	5.3	7.3
2	13	1	1.1	3.4	2.6	24	111.8	92.6	1.8	1.4	0	0
3	13	1	3.5	1.1	7.2	29.8	56.4	77.7	2.1	2	0	2.8
4	13	1	1.6	0.8	4.6	19.6	86.4	105.8	4.2	3.4	0	4.1
5	13	1	3.5	4.7	7.7	40.3	89	103.2	4.4	12.5	0	2.6
6	13	1	0.9	3.1	2	36.2	118.3	91.9	1.9	2.5	0	6.8
7	13	1	1.6	3.1	3	25.8	104.4	88	1.7	0.6	0	5.5
8	13	1	5	2.9	4.4	39.9	96.8	94.3	1.6	10.4	0	0
9	13	1	2.8	6	6.8	45.9	103	94	1.2	1.5	2.2	6.8
10	13	1	1.7	4.1	5.6	26	112.9	107	2.6	2.1	0	0
11	13	1	2.8	4.7	4.5	41.3	100.4	94.3	1.7	2.7	0	5.7
12	13	1	0	0.6	4.5	46.9	97.2	94.4	2.2	2.2	0	3.4
13	13	1	0.5	0.7	7.8	39.3	81.4	93	2.3	2.5	0	0
14	13	1	0	0	1.3	35.5	100	84.5	0	1.3	0	0
15	13	1	2.5	4.2	4.3	28.8	89.3	89.2	1.9	2.5	0	0
16	13	1	1	2.9	5.4	41.6	101.6	89.8	1.3	2.1	2	0
17	13	1	0.7	0.6	2	27.5	102.6	101.2	1.3	1.6	1.8	2.9
18	13	1	3.9	1.4	5.8	44.9	99.7	94.2	3.3	3.5	0	0
19	13	1	0	2.3	5.6	31.6	86.8	88.5	1.7	2.5	5.6	0
20	13	1	0.7	2.4	5.7	44.1	102	92.8	3.7	3.4	0	5.7
21	13	1	0.5	0.8	3.8	32.1	89.5	93.9	2.1	2.8	8.2	8.8
22	13	1	0.9	3.3	4.7	33.5	99.1	99.8	1.8	2.2	0	6.5
23	13	1	0.7	1.1	8.1	32.5	100	112.9	1	0.9	0	0
24	13	1	2.5	3	3.5	32.1	111.9	96.5	2.1	2.2	0	0
25	13	1	0.5	-0.2	1.7	39.1	101.2	94.3	0.9	1.1	0	8.5
26	13	1	0.1	0.9	1.5	24.5	108.9	97.2	1.2	1.4	0	0
27	13	1	1.1	0.3	5.9	24.8	108.7	104	1.5	4.1	0	0
28	13	1	0	0	3.1	41.5	110.5	95.7	2.5	2.8	0	0
29	13	1	0.3	0.9	3.7	29.1	122.1	100.5	1.9	2.5	0	0
30	13	1	0	0.8	5.9	35.1	107.5	110	1.1	2.7	5.4	10.4
1	21	1	0	0	5.3	40.8	91.9	93.3	1.4	1	0	0
2	21	1	1.1	3.4	2.6	24	111.8	92.6	1	1.6	0	0
3	21	1	3.5	1.1	7.2	29.8	56.4	77.7	2.6	1	3.4	0
4	21	1	1.6	0.8	4.6	19.6	86.4	105.8	1.8	2.2	0	1.9
5	21	1	3.5	4.7	7.7	40.3	89	103.2	2	2.7	0	0
6	21	1	0.9	3.1	2	36.2	118.3	91.9	1.4	1.2	0	0
7	21	1	1.6	3.1	3	25.8	104.4	88	1.6	1.5	0	0
8	21	1	5	2.9	4.4	39.9	96.8	94.3	1.2	1.4	0	0
9	21	1	2.8	6	6.8	45.9	103	94	1.4	2.6	0	0
10	21	1	1.7	4.1	5.6	26	112.9	107	1.1	1.8	0	0
11	21	1	2.8	4.7	4.5	41.3	100.4	94.3	1.1	1.3	0	0
12	21	1	0	0.6	4.5	46.9	97.2	94.4	2	1.5	6.4	0
13	21	1	0.5	0.7	7.8	39.3	81.4	93	2	1.7	0	0
14	21	1	0	0	1.3	35.5	100	84.5	0	1	0	0
15	21	1	2.5	4.2	4.3	28.8	89.3	89.2	2.1	10.9	0	0
16	21	1	1	2.9	5.4	41.6	101.6	89.8	1.4	1.7	0	0
17	21	1	0.7	0.6	2	27.5	102.6	101.2	1.9	1.8	2.1	0
18	21	1	3.9	1.4	5.8	44.9	99.7	94.2	1.1	3.1	0	0
19	21	1	0	2.3	5.6	31.6	86.8	88.5	0.9	1.9	0	0
20	21	1	0.7	2.4	5.7	44.1	102	92.8	2.7	2.9	0	0
21	21	1	0.5	0.8	3.8	32.1	89.5	93.9	1.8	2.4	0	0
22	21	1	0.9	3.3	4.7	33.5	99.1	99.8	1.5	1.9	0	0
23	21	1	0.7	1.1	8.1	32.5	100	112.9	1.8	1.9	0	0
24	21	1	2.5	3	3.5	32.1	111.9	96.5	2.5	2.6	0	0
25	21	1	0.5	-0.2	1.7	39.1	101.2	94.3	1.4	1.6	0	0
26	21	1	0.1	0.9	1.5	24.5	108.9	97.2	1.6	0.9	0	0
27	21	1	1.1	0.3	5.9	24.8	108.7	104	2	3.1	0	0
28	21	1	0	0	3.1	41.5	110.5	95.7	1.2	1.8	0	0
29	21	1	0.3	0.9	3.7	29.1	122.1	100.5	1.4	1.8	0	0
30	21	1	0	0.8	5.9	35.1	107.5	110	1.2	1.3	5.7	2.6
1	22	1	0	0	5.3	40.8	91.9	93.3	2.3	1.6	4.9	6
2	22	1	1.1	3.4	2.6	24	111.8	92.6	1.2	1.7	0	2.3
3	22	1	3.5	1.1	7.2	29.8	56.4	77.7	1.5	1.2	6.1	0
4	22	1	1.6	0.8	4.6	19.6	86.4	105.8	4.7	3.7	6	0
5	22	1	3.5	4.7	7.7	40.3	89	103.2	11.2	11.5	0	2.1
6	22	1	0.9	3.1	2	36.2	118.3	91.9	2	1.9	0	0
7	22	1	1.6	3.1	3	25.8	104.4	88	1.2	1.3	0	0
8	22	1	5	2.9	4.4	39.9	96.8	94.3	1.3	11.4	5.9	3.2
9	22	1	2.8	6	6.8	45.9	103	94	2.2	2.5	6	2.2
10	22	1	1.7	4.1	5.6	26	112.9	107	1.7	1.6	0	0
11	22	1	2.8	4.7	4.5	41.3	100.4	94.3	2.4	2.8	0	0
12	22	1	0	0.6	4.5	46.9	97.2	94.4	2.5	1.8	0	1.8
13	22	1	0.5	0.7	7.8	39.3	81.4	93	3.9	3.1	0	0
14	22	1	0	0	1.3	35.5	100	84.5	1.5	1.5	0	0
15	22	1	2.5	4.2	4.3	28.8	89.3	89.2	1.6	2.9	0	0
16	22	1	1	2.9	5.4	41.6	101.6	89.8	1.8	1.9	0	2.1
17	22	1	0.7	0.6	2	27.5	102.6	101.2	2.1	1.8	3.3	3.4
18	22	1	3.9	1.4	5.8	44.9	99.7	94.2	1.8	2.9	3.8	5.8
19	22	1	0	2.3	5.6	31.6	86.8	88.5	1.1	0.9	1.9	2.2
20	22	1	0.7	2.4	5.7	44.1	102	92.8	3.5	4.5	0	0
21	22	1	0.5	0.8	3.8	32.1	89.5	93.9	11.7	11.5	0	0
22	22	1	0.9	3.3	4.7	33.5	99.1	99.8	1.9	2.5	0	2
23	22	1	0.7	1.1	8.1	32.5	100	112.9	1.7	1.7	0	0
24	22	1	2.5	3	3.5	32.1	111.9	96.5	2.1	2.5	0	0
25	22	1	0.5	-0.2	1.7	39.1	101.2	94.3	2.2	1.4	3.3	3.3
26	22	1	0.1	0.9	1.5	24.5	108.9	97.2	2	1.6	0	0
27	22	1	1.1	0.3	5.9	24.8	108.7	104	3.4	3.3	0	0
28	22	1	0	0	3.1	41.5	110.5	95.7	2.2	1.8	0	0
29	22	1	0.3	0.9	3.7	29.1	122.1	100.5	2.9	2.4	5.2	0
30	22	1	0	0.8	5.9	35.1	107.5	110	1.7	1	3	2.6
1	23	1	0	0	5.3	40.8	91.9	93.3	1.9	1	0	0
2	23	1	1.1	3.4	2.6	24	111.8	92.6	1.5	1.2	0	2.1
3	23	1	3.5	1.1	7.2	29.8	56.4	77.7	1.8	1.4	0	6.1
4	23	1	1.6	0.8	4.6	19.6	86.4	105.8	3.9	2.6	0	6.4
5	23	1	3.5	4.7	7.7	40.3	89	103.2	3.4	12.8	7.8	2.6
6	23	1	0.9	3.1	2	36.2	118.3	91.9	13	13.2	0	0
7	23	1	1.6	3.1	3	25.8	104.4	88	2.9	1.7	0	7.7
8	23	1	5	2.9	4.4	39.9	96.8	94.3	1.6	1.8	9.5	7.4
9	23	1	2.8	6	6.8	45.9	103	94	1.5	1.4	0	6.8
10	23	1	1.7	4.1	5.6	26	112.9	107	3.2	3.9	0	3
11	23	1	2.8	4.7	4.5	41.3	100.4	94.3	2.1	2.2	0	8.8
12	23	1	0	0.6	4.5	46.9	97.2	94.4	2.1	1.8	0	6.9
13	23	1	0.5	0.7	7.8	39.3	81.4	93	2.3	1.5	0	3.8
14	23	1	0	0	1.3	35.5	100	84.5	1.9	2	0	0
15	23	1	2.5	4.2	4.3	28.8	89.3	89.2	1.7	2.9	0	0
16	23	1	1	2.9	5.4	41.6	101.6	89.8	1.4	1.5	0	2.4
17	23	1	0.7	0.6	2	27.5	102.6	101.2	3.3	3.2	3.9	0
18	23	1	3.9	1.4	5.8	44.9	99.7	94.2	4.5	3.4	0	4.4
19	23	1	0	2.3	5.6	31.6	86.8	88.5	1.2	1.8	6.2	5.4
20	23	1	0.7	2.4	5.7	44.1	102	92.8	2.8	3.9	0	7.8
21	23	1	0.5	0.8	3.8	32.1	89.5	93.9	1.9	2.3	3.5	3.5
22	23	1	0.9	3.3	4.7	33.5	99.1	99.8	2	3.1	8.8	6.7
23	23	1	0.7	1.1	8.1	32.5	100	112.9	1.2	1.6	0	0
24	23	1	2.5	3	3.5	32.1	111.9	96.5	2.2	3.1	0	2.6
25	23	1	0.5	-0.2	1.7	39.1	101.2	94.3	2	2.2	0	1.9
26	23	1	0.1	0.9	1.5	24.5	108.9	97.2	2	2.1	0	0
27	23	1	1.1	0.3	5.9	24.8	108.7	104	2	3.8	0	0
28	23	1	0	0	3.1	41.5	110.5	95.7	4.4	4.4	0	2.9
29	23	1	0.3	0.9	3.7	29.1	122.1	100.5	11.6	2.5	0	0
30	23	1	0	0.8	5.9	35.1	107.5	110	1.8	1.8	4.6	7.8
1	31	1	0	0	5.3	40.8	91.9	93.3	9.5	5.7	0	0
2	31	1	1.1	3.4	2.6	24	111.8	92.6	2	1.8	0	2.6
3	31	1	3.5	1.1	7.2	29.8	56.4	77.7	6.1	8.4	0	0
4	31	1	1.6	0.8	4.6	19.6	86.4	105.8	1.7	4.5	0	0
5	31	1	3.5	4.7	7.7	40.3	89	103.2	4.5	7.9	0	2.1
6	31	1	0.9	3.1	2	36.2	118.3	91.9	1.2	10.3	0	0
7	31	1	1.6	3.1	3	25.8	104.4	88	1.3	7.4	0	0
8	31	1	5	2.9	4.4	39.9	96.8	94.3	2	2.6	0	0
9	31	1	2.8	6	6.8	45.9	103	94	2.5	7.2	0	2.4
10	31	1	1.7	4.1	5.6	26	112.9	107	1.7	6.7	1	2.2
11	31	1	2.8	4.7	4.5	41.3	100.4	94.3	2	2.7	0	0
12	31	1	0	0.6	4.5	46.9	97.2	94.4	1.8	1	6.3	4.7
13	31	1	0.5	0.7	7.8	39.3	81.4	93	1.7	6	0	0
14	31	1	0	0	1.3	35.5	100	84.5	1.6	1.6	0	0
15	31	1	2.5	4.2	4.3	28.8	89.3	89.2	1.9	7.3	2.3	2.6
16	31	1	1	2.9	5.4	41.6	101.6	89.8	0.6	9.6	0	0
17	31	1	0.7	0.6	2	27.5	102.6	101.2	0.8	1.1	1.8	4.1
18	31	1	3.9	1.4	5.8	44.9	99.7	94.2	2.2	8.5	2.2	0
19	31	1	0	2.3	5.6	31.6	86.8	88.5	0.8	0.3	0	2.4
20	31	1	0.7	2.4	5.7	44.1	102	92.8	12.2	2.3	0	0
21	31	1	0.5	0.8	3.8	32.1	89.5	93.9	6.5	6.1	0	0
22	31	1	0.9	3.3	4.7	33.5	99.1	99.8	2.7	2.1	0	0
23	31	1	0.7	1.1	8.1	32.5	100	112.9	1.9	2.7	0	0
24	31	1	2.5	3	3.5	32.1	111.9	96.5	2.8	3.2	0	4.5
25	31	1	0.5	-0.2	1.7	39.1	101.2	94.3	7.6	8.7	0	0
26	31	1	0.1	0.9	1.5	24.5	108.9	97.2	2	1.2	0	0
27	31	1	1.1	0.3	5.9	24.8	108.7	104	4	8.1	0	0
28	31	1	0	0	3.1	41.5	110.5	95.7	1.7	2	0	0
29	31	1	0.3	0.9	3.7	29.1	122.1	100.5	1.4	5.9	0	0
30	31	1	0	0.8	5.9	35.1	107.5	110	1.7	1.9	0	7.8
1	32	1	0	0	5.3	40.8	91.9	93.3	2.1	1.5	4	4.3
2	32	1	1.1	3.4	2.6	24	111.8	92.6	1.6	1.3	0	0
3	32	1	3.5	1.1	7.2	29.8	56.4	77.7	4.2	8.3	0	0
4	32	1	1.6	0.8	4.6	19.6	86.4	105.8	1.8	5.6	0	0
5	32	1	3.5	4.7	7.7	40.3	89	103.2	1.6	8.7	0	0
6	32	1	0.9	3.1	2	36.2	118.3	91.9	2.7	8.4	0	0
7	32	1	1.6	3.1	3	25.8	104.4	88	1.9	8.1	0	0
8	32	1	5	2.9	4.4	39.9	96.8	94.3	1.6	1.5	5.1	7.1
9	32	1	2.8	6	6.8	45.9	103	94	2.8	7.9	5.6	0
10	32	1	1.7	4.1	5.6	26	112.9	107	1.5	7.6	2	0
11	32	1	2.8	4.7	4.5	41.3	100.4	94.3	1.2	1.7	0	2.7
12	32	1	0	0.6	4.5	46.9	97.2	94.4	2.1	2.4	0	2
13	32	1	0.5	0.7	7.8	39.3	81.4	93	1.9	6.8	3.1	0
14	32	1	0	0	1.3	35.5	100	84.5	1.4	1.7	0	0
15	32	1	2.5	4.2	4.3	28.8	89.3	89.2	1.4	8.4	0	0
16	32	1	1	2.9	5.4	41.6	101.6	89.8	1.3	10.5	2.4	0
17	32	1	0.7	0.6	2	27.5	102.6	101.2	1.5	1.1	1.8	2.4
18	32	1	3.9	1.4	5.8	44.9	99.7	94.2	2.3	8.8	2.1	0
19	32	1	0	2.3	5.6	31.6	86.8	88.5	0	6.6	4.4	0
20	32	1	0.7	2.4	5.7	44.1	102	92.8	2.2	3.1	0	3.2
21	32	1	0.5	0.8	3.8	32.1	89.5	93.9	8.3	7.1	0	0
22	32	1	0.9	3.3	4.7	33.5	99.1	99.8	2.6	2.3	0	0
23	32	1	0.7	1.1	8.1	32.5	100	112.9	2.1	1.7	0	0
24	32	1	2.5	3	3.5	32.1	111.9	96.5	3	3	2.8	3
25	32	1	0.5	-0.2	1.7	39.1	101.2	94.3	10	9.4	0	0
26	32	1	0.1	0.9	1.5	24.5	108.9	97.2	6.9	7.3	0	0
27	32	1	1.1	0.3	5.9	24.8	108.7	104	3.6	7.8	0	0
28	32	1	0	0	3.1	41.5	110.5	95.7	2.7	2.1	0	0
29	32	1	0.3	0.9	3.7	29.1	122.1	100.5	1.8	2.3	4.1	2.3
30	32	1	0	0.8	5.9	35.1	107.5	110	1.1	1.7	0	3.5
1	33	1	0	0	5.3	40.8	91.9	93.3	1.4	8.1	4.4	0
2	33	1	1.1	3.4	2.6	24	111.8	92.6	1.1	1.1	0	0
3	33	1	3.5	1.1	7.2	29.8	56.4	77.7	1	1	0	0
4	33	1	1.6	0.8	4.6	19.6	86.4	105.8	2.4	5.6	0	0
5	33	1	3.5	4.7	7.7	40.3	89	103.2	1.7	11.3	0	0
6	33	1	0.9	3.1	2	36.2	118.3	91.9	1.8	8.4	0	0
7	33	1	1.6	3.1	3	25.8	104.4	88	1.6	0.7	0	0
8	33	1	5	2.9	4.4	39.9	96.8	94.3	1	10.1	3.9	0
9	33	1	2.8	6	6.8	45.9	103	94	11.3	10.3	0	0
10	33	1	1.7	4.1	5.6	26	112.9	107	2.2	1.9	0	0
11	33	1	2.8	4.7	4.5	41.3	100.4	94.3	0.9	1	0	0
12	33	1	0	0.6	4.5	46.9	97.2	94.4	1.6	1.2	0	2.3
13	33	1	0.5	0.7	7.8	39.3	81.4	93	1.5	2.2	0	0
14	33	1	0	0	1.3	35.5	100	84.5	2.2	2.4	0	0
15	33	1	2.5	4.2	4.3	28.8	89.3	89.2	2.2	6.3	2.1	0
16	33	1	1	2.9	5.4	41.6	101.6	89.8	0.7	1.2	5.7	7.3
17	33	1	0.7	0.6	2	27.5	102.6	101.2	1.5	0.8	3.1	2.9
18	33	1	3.9	1.4	5.8	44.9	99.7	94.2	2.2	2.7	0	0
19	33	1	0	2.3	5.6	31.6	86.8	88.5	0	0	3.8	4.4
20	33	1	0.7	2.4	5.7	44.1	102	92.8	10	8.1	0	0
21	33	1	0.5	0.8	3.8	32.1	89.5	93.9	8.2	1.2	0	5.2
22	33	1	0.9	3.3	4.7	33.5	99.1	99.8	7.8	10.2	0	0
23	33	1	0.7	1.1	8.1	32.5	100	112.9	1.7	7	0	0
24	33	1	2.5	3	3.5	32.1	111.9	96.5	2.4	2.2	4	5.9
25	33	1	0.5	-0.2	1.7	39.1	101.2	94.3	8	2.2	0	0
26	33	1	0.1	0.9	1.5	24.5	108.9	97.2	0.6	1.2	0	0
27	33	1	1.1	0.3	5.9	24.8	108.7	104	2.8	3.4	0	0
28	33	1	0	0	3.1	41.5	110.5	95.7	2.2	3.5	0	0
29	33	1	0.3	0.9	3.7	29.1	122.1	100.5	3.5	2.8	0	0
30	33	1	0	0.8	5.9	35.1	107.5	110	1.3	2.4	0	10.1
1	41	1	0	0	5.3	40.8	91.9	93.3	8.7	9.7	0	0
2	41	1	1.1	3.4	2.6	24	111.8	92.6	1.4	1.6	0	0
3	41	1	3.5	1.1	7.2	29.8	56.4	77.7	7.7	8.6	0	0
4	41	1	1.6	0.8	4.6	19.6	86.4	105.8	2.5	3	0	0
5	41	1	3.5	4.7	7.7	40.3	89	103.2	3.5	9.1	0	2.5
6	41	1	0.9	3.1	2	36.2	118.3	91.9	1.5	8.3	0	2.1
7	41	1	1.6	3.1	3	25.8	104.4	88	1.9	5	0	0
8	41	1	5	2.9	4.4	39.9	96.8	94.3	5.4	7	0	0
9	41	1	2.8	6	6.8	45.9	103	94	2.4	7.4	0	0
10	41	1	1.7	4.1	5.6	26	112.9	107	1.6	7.3	1.5	0
11	41	1	2.8	4.7	4.5	41.3	100.4	94.3	1.8	2.7	0	2.1
12	41	1	0	0.6	4.5	46.9	97.2	94.4	1.5	1.1	3	5
13	41	1	0.5	0.7	7.8	39.3	81.4	93	1.6	6.9	0	0
14	41	1	0	0	1.3	35.5	100	84.5	2.1	2.6	0	0
15	41	1	2.5	4.2	4.3	28.8	89.3	89.2	1.2	8.3	1.9	2.9
16	41	1	1	2.9	5.4	41.6	101.6	89.8	0.8	9.7	0	0
17	41	1	0.7	0.6	2	27.5	102.6	101.2	1.5	1	0	4.8
18	41	1	3.9	1.4	5.8	44.9	99.7	94.2	3.5	8.2	0	0
19	41	1	0	2.3	5.6	31.6	86.8	88.5	0	0.8	1.2	0
20	41	1	0.7	2.4	5.7	44.1	102	92.8	2.5	2.2	0	0
21	41	1	0.5	0.8	3.8	32.1	89.5	93.9	6.3	7	0	0
22	41	1	0.9	3.3	4.7	33.5	99.1	99.8	1.8	0.6	0	2.8
23	41	1	0.7	1.1	8.1	32.5	100	112.9	1.7	1.8	0	0
24	41	1	2.5	3	3.5	32.1	111.9	96.5	2.4	10.2	0	0
25	41	1	0.5	-0.2	1.7	39.1	101.2	94.3	1.7	9.6	1.6	0
26	41	1	0.1	0.9	1.5	24.5	108.9	97.2	0.7	1.6	0	0
27	41	1	1.1	0.3	5.9	24.8	108.7	104	3.7	7.7	0	0
28	41	1	0	0	3.1	41.5	110.5	95.7	2.5	2.8	0	0
29	41	1	0.3	0.9	3.7	29.1	122.1	100.5	1	2.1	0	3.2
30	41	1	0	0.8	5.9	35.1	107.5	110	1.7	1.7	0	5.2
1	42	1	0	0	5.3	40.8	91.9	93.3	1.9	2.2	5.4	4
2	42	1	1.1	3.4	2.6	24	111.8	92.6	1.6	0.8	0	2.9
3	42	1	3.5	1.1	7.2	29.8	56.4	77.7	8.2	8.9	0	0
4	42	1	1.6	0.8	4.6	19.6	86.4	105.8	2.3	2.3	0	2.3
5	42	1	3.5	4.7	7.7	40.3	89	103.2	5.2	8.8	0	2.8
6	42	1	0.9	3.1	2	36.2	118.3	91.9	2.1	7.3	0	0
7	42	1	1.6	3.1	3	25.8	104.4	88	2.3	6.3	0	0
8	42	1	5	2.9	4.4	39.9	96.8	94.3	1.3	9.1	4.7	0
9	42	1	2.8	6	6.8	45.9	103	94	2.2	7.3	0	0
10	42	1	1.7	4.1	5.6	26	112.9	107	1.2	6.2	1.8	0
11	42	1	2.8	4.7	4.5	41.3	100.4	94.3	1.3	1.5	0	3.5
12	42	1	0	0.6	4.5	46.9	97.2	94.4	1.8	2	3	3.9
13	42	1	0.5	0.7	7.8	39.3	81.4	93	2	8.3	1.9	0
14	42	1	0	0	1.3	35.5	100	84.5	1.2	1.1	0	0
15	42	1	2.5	4.2	4.3	28.8	89.3	89.2	3.1	9.1	0	0
16	42	1	1	2.9	5.4	41.6	101.6	89.8	1.1	1.4	3.5	7.2
17	42	1	0.7	0.6	2	27.5	102.6	101.2	1.1	1.3	1.9	4.4
18	42	1	3.9	1.4	5.8	44.9	99.7	94.2	1.2	9.1	1.9	0
19	42	1	0	2.3	5.6	31.6	86.8	88.5	3.5	5.8	0	0
20	42	1	0.7	2.4	5.7	44.1	102	92.8	1.8	2	3.3	2.4
21	42	1	0.5	0.8	3.8	32.1	89.5	93.9	0.9	8.8	0	0
22	42	1	0.9	3.3	4.7	33.5	99.1	99.8	1.2	1.1	0	3.4
23	42	1	0.7	1.1	8.1	32.5	100	112.9	2	3.8	0	0
24	42	1	2.5	3	3.5	32.1	111.9	96.5	2.8	10.1	3.3	0
25	42	1	0.5	-0.2	1.7	39.1	101.2	94.3	7.1	7.4	0	0
26	42	1	0.1	0.9	1.5	24.5	108.9	97.2	1.6	1.2	2.5	0
27	42	1	1.1	0.3	5.9	24.8	108.7	104	3.7	7.1	3.5	0
28	42	1	0	0	3.1	41.5	110.5	95.7	1.4	1.7	0	0
29	42	1	0.3	0.9	3.7	29.1	122.1	100.5	2.3	1.2	0	3.4
30	42	1	0	0.8	5.9	35.1	107.5	110	1.6	10.9	1.8	3.1
1	43	1	0	0	5.3	40.8	91.9	93.3	1.3	1.1	3.9	4.6
2	43	1	1.1	3.4	2.6	24	111.8	92.6	1.6	1.7	0	0
3	43	1	3.5	1.1	7.2	29.8	56.4	77.7	2.7	2.6	0	0
4	43	1	1.6	0.8	4.6	19.6	86.4	105.8	0.7	1.8	0	0
5	43	1	3.5	4.7	7.7	40.3	89	103.2	3.7	3.7	0	3.1
6	43	1	0.9	3.1	2	36.2	118.3	91.9	1.4	9.4	4.2	0
7	43	1	1.6	3.1	3	25.8	104.4	88	1.6	6.3	0	0
8	43	1	5	2.9	4.4	39.9	96.8	94.3	1.2	1.3	5.6	0
9	43	1	2.8	6	6.8	45.9	103	94	9.8	9.9	0	0
10	43	1	1.7	4.1	5.6	26	112.9	107	2.3	5.6	0	0
11	43	1	2.8	4.7	4.5	41.3	100.4	94.3	1.3	1	5.6	5.3
12	43	1	0	0.6	4.5	46.9	97.2	94.4	1.4	1.5	0	0
13	43	1	0.5	0.7	7.8	39.3	81.4	93	1.4	1.7	0	0
14	43	1	0	0	1.3	35.5	100	84.5	1.2	2.1	0	0
15	43	1	2.5	4.2	4.3	28.8	89.3	89.2	1.2	2.7	4.7	0
16	43	1	1	2.9	5.4	41.6	101.6	89.8	0.7	0.7	9.3	7.7
17	43	1	0.7	0.6	2	27.5	102.6	101.2	1	1.9	0	0
18	43	1	3.9	1.4	5.8	44.9	99.7	94.2	1.9	3.3	1.8	0
19	43	1	0	2.3	5.6	31.6	86.8	88.5	0.9	1.3	2.4	3.1
20	43	1	0.7	2.4	5.7	44.1	102	92.8	12	2.6	0	0
21	43	1	0.5	0.8	3.8	32.1	89.5	93.9	1.2	1.8	0	2.5
22	43	1	0.9	3.3	4.7	33.5	99.1	99.8	2.8	2.1	0	0
23	43	1	0.7	1.1	8.1	32.5	100	112.9	1.7	2	0	0
24	43	1	2.5	3	3.5	32.1	111.9	96.5	7.9	8.3	0	0
25	43	1	0.5	-0.2	1.7	39.1	101.2	94.3	1	1.3	3.3	0
26	43	1	0.1	0.9	1.5	24.5	108.9	97.2	1.4	2.3	0	0
27	43	1	1.1	0.3	5.9	24.8	108.7	104	3	1.9	0	0
28	43	1	0	0	3.1	41.5	110.5	95.7	1.7	3.1	0	0
29	43	1	0.3	0.9	3.7	29.1	122.1	100.5	6.9	5.5	0	0
30	43	1	0	0.8	5.9	35.1	107.5	110	1.7	9.2	3.3	7.4
1	11	2	0	0	5.3	40.8	91.9	93.3	1.8	1.9	0	0
2	11	2	1.1	3.4	2.6	24	111.8	92.6	2.1	2.2	0	0
3	11	2	3.5	1.1	7.2	29.8	56.4	77.7	2.2	1.5	0	0
4	11	2	1.6	0.8	4.6	19.6	86.4	105.8	1.8	1.1	0	0
5	11	2	3.5	4.7	7.7	40.3	89	103.2	1.5	4.3	0	0
6	11	2	0.9	3.1	2	36.2	118.3	91.9	1.5	1.5	0	0
7	11	2	1.6	3.1	3	25.8	104.4	88	1.5	0.8	0	0
8	11	2	5	2.9	4.4	39.9	96.8	94.3	1.6	1.7	0	0
9	11	2	2.8	6	6.8	45.9	103	94	0.6	2.4	0	0
10	11	2	1.7	4.1	5.6	26	112.9	107	1.4	1.4	0	0
11	11	2	2.8	4.7	4.5	41.3	100.4	94.3	1.7	1.2	0	0
12	11	2	0	0.6	4.5	46.9	97.2	94.4	1.7	0.7	0	0
13	11	2	0.5	0.7	7.8	39.3	81.4	93	1.6	2.1	0	0
14	11	2	0	0	1.3	35.5	100	84.5	2	1.4	0	0
15	11	2	2.5	4.2	4.3	28.8	89.3	89.2	1.3	1.5	0	0
16	11	2	1	2.9	5.4	41.6	101.6	89.8	1.9	1.4	0	0
17	11	2	0.7	0.6	2	27.5	102.6	101.2	1.4	1.7	0	0
18	11	2	3.9	1.4	5.8	44.9	99.7	94.2	1.4	1.7	0	0
19	11	2	0	2.3	5.6	31.6	86.8	88.5	0.9	1.2	0	0
20	11	2	0.7	2.4	5.7	44.1	102	92.8	2	3.3	0	0
21	11	2	0.5	0.8	3.8	32.1	89.5	93.9	1.6	1.9	0	0
22	11	2	0.9	3.3	4.7	33.5	99.1	99.8	1.3	2.3	0	0
23	11	2	0.7	1.1	8.1	32.5	100	112.9	1.4	2.6	0	0
24	11	2	2.5	3	3.5	32.1	111.9	96.5	1.5	1.5	0	0
25	11	2	0.5	-0.2	1.7	39.1	101.2	94.3	1.7	2.7	0	0
26	11	2	0.1	0.9	1.5	24.5	108.9	97.2	1.5	1.1	0	0
27	11	2	1.1	0.3	5.9	24.8	108.7	104	1.6	1.5	0	0
28	11	2	0	0	3.1	41.5	110.5	95.7	1.9	1.9	0	0
29	11	2	0.3	0.9	3.7	29.1	122.1	100.5	1.6	3.3	0	0
30	11	2	0	0.8	5.9	35.1	107.5	110	1.2	1.3	0	0
1	12	2	0	0	5.3	40.8	91.9	93.3	1.5	1	0	0
2	12	2	1.1	3.4	2.6	24	111.8	92.6	1.5	2	0	0
3	12	2	3.5	1.1	7.2	29.8	56.4	77.7	2.1	4.6	0	0
4	12	2	1.6	0.8	4.6	19.6	86.4	105.8	1.3	1.6	0	0
5	12	2	3.5	4.7	7.7	40.3	89	103.2	2.1	7.6	0	0
6	12	2	0.9	3.1	2	36.2	118.3	91.9	1.2	1	0	0
7	12	2	1.6	3.1	3	25.8	104.4	88	1.4	4.6	0	0
8	12	2	5	2.9	4.4	39.9	96.8	94.3	1.6	2.8	0	0
9	12	2	2.8	6	6.8	45.9	103	94	1	1.8	0	0
10	12	2	1.7	4.1	5.6	26	112.9	107	1	1	0	0
11	12	2	2.8	4.7	4.5	41.3	100.4	94.3	1.4	1.6	0	0
12	12	2	0	0.6	4.5	46.9	97.2	94.4	1.8	1.6	0	0
13	12	2	0.5	0.7	7.8	39.3	81.4	93	1.7	2.6	0	0
14	12	2	0	0	1.3	35.5	100	84.5	0	0.7	0	0
15	12	2	2.5	4.2	4.3	28.8	89.3	89.2	1.1	2.1	0	0
16	12	2	1	2.9	5.4	41.6	101.6	89.8	1.4	0	0	0
17	12	2	0.7	0.6	2	27.5	102.6	101.2	1.2	2.4	0	0
18	12	2	3.9	1.4	5.8	44.9	99.7	94.2	1.5	2.6	0	0
19	12	2	0	2.3	5.6	31.6	86.8	88.5	1.2	1.8	0	0
20	12	2	0.7	2.4	5.7	44.1	102	92.8	1.6	2.1	0	0
21	12	2	0.5	0.8	3.8	32.1	89.5	93.9	1.4	1.2	0	0
22	12	2	0.9	3.3	4.7	33.5	99.1	99.8	1.9	1.3	0	0
23	12	2	0.7	1.1	8.1	32.5	100	112.9	1.2	2	0	0
24	12	2	2.5	3	3.5	32.1	111.9	96.5	1.4	2.2	0	0
25	12	2	0.5	-0.2	1.7	39.1	101.2	94.3	0.8	2.4	0	0
26	12	2	0.1	0.9	1.5	24.5	108.9	97.2	0.9	2.2	0	0
27	12	2	1.1	0.3	5.9	24.8	108.7	104	1.9	1.7	0	0
28	12	2	0	0	3.1	41.5	110.5	95.7	1.1	1.4	0	0
29	12	2	0.3	0.9	3.7	29.1	122.1	100.5	3.8	7.2	0	0
30	12	2	0	0.8	5.9	35.1	107.5	110	0.9	1.5	0	0
1	13	2	0	0	5.3	40.8	91.9	93.3	1.8	1.8	0	0
2	13	2	1.1	3.4	2.6	24	111.8	92.6	1.7	1.8	0	0
3	13	2	3.5	1.1	7.2	29.8	56.4	77.7	3.6	2.1	0	0
4	13	2	1.6	0.8	4.6	19.6	86.4	105.8	1.9	2.1	0	0
5	13	2	3.5	4.7	7.7	40.3	89	103.2	2	4.6	0	0
6	13	2	0.9	3.1	2	36.2	118.3	91.9	1.6	1.8	0	0
7	13	2	1.6	3.1	3	25.8	104.4	88	1.7	1.8	0	0
8	13	2	5	2.9	4.4	39.9	96.8	94.3	1.4	1.8	0	0
9	13	2	2.8	6	6.8	45.9	103	94	2.6	2.3	0	0
10	13	2	1.7	4.1	5.6	26	112.9	107	2	1.6	0	0
11	13	2	2.8	4.7	4.5	41.3	100.4	94.3	1.8	4.1	0	0
12	13	2	0	0.6	4.5	46.9	97.2	94.4	1.6	1.9	0	0
13	13	2	0.5	0.7	7.8	39.3	81.4	93	2	2.3	0	0
14	13	2	0	0	1.3	35.5	100	84.5	0	0	0	0
15	13	2	2.5	4.2	4.3	28.8	89.3	89.2	1.1	2.2	0	0
16	13	2	1	2.9	5.4	41.6	101.6	89.8	1.8	2.3	0	0
17	13	2	0.7	0.6	2	27.5	102.6	101.2	2.4	2	0	0
18	13	2	3.9	1.4	5.8	44.9	99.7	94.2	1.9	3.6	0	0
19	13	2	0	2.3	5.6	31.6	86.8	88.5	0.8	1.5	0	0
20	13	2	0.7	2.4	5.7	44.1	102	92.8	2.8	2.4	0	0
21	13	2	0.5	0.8	3.8	32.1	89.5	93.9	2.5	2.5	0	0
22	13	2	0.9	3.3	4.7	33.5	99.1	99.8	1.1	3.1	0	0
23	13	2	0.7	1.1	8.1	32.5	100	112.9	0.9	1.2	0	2.1
24	13	2	2.5	3	3.5	32.1	111.9	96.5	1.9	2.3	0	0
25	13	2	0.5	-0.2	1.7	39.1	101.2	94.3	0	2.4	0	0
26	13	2	0.1	0.9	1.5	24.5	108.9	97.2	2.4	1	0	0
27	13	2	1.1	0.3	5.9	24.8	108.7	104	2	2.1	0	0
28	13	2	0	0	3.1	41.5	110.5	95.7	1.9	2.2	0	0
29	13	2	0.3	0.9	3.7	29.1	122.1	100.5	4.3	5.1	0	0
30	13	2	0	0.8	5.9	35.1	107.5	110	1.8	1.5	0	0
1	21	2	0	0	5.3	40.8	91.9	93.3	1.8	1.8	0	0
2	21	2	1.1	3.4	2.6	24	111.8	92.6	1.2	1.5	0	0
3	21	2	3.5	1.1	7.2	29.8	56.4	77.7	2.3	1	0	0
4	21	2	1.6	0.8	4.6	19.6	86.4	105.8	1.4	1.6	0	0
5	21	2	3.5	4.7	7.7	40.3	89	103.2	2	7.2	0	0
6	21	2	0.9	3.1	2	36.2	118.3	91.9	2.2	1.9	0	0
7	21	2	1.6	3.1	3	25.8	104.4	88	1.8	4	0	0
8	21	2	5	2.9	4.4	39.9	96.8	94.3	2.1	1.5	0	0
9	21	2	2.8	6	6.8	45.9	103	94	1.7	2.1	0	0
10	21	2	1.7	4.1	5.6	26	112.9	107	1.5	1.4	0	0
11	21	2	2.8	4.7	4.5	41.3	100.4	94.3	0.9	1.2	0	0
12	21	2	0	0.6	4.5	46.9	97.2	94.4	1.9	2	0	0
13	21	2	0.5	0.7	7.8	39.3	81.4	93	2.2	1.4	0	0
14	21	2	0	0	1.3	35.5	100	84.5	0	1	0	0
15	21	2	2.5	4.2	4.3	28.8	89.3	89.2	1.8	1.8	0	0
16	21	2	1	2.9	5.4	41.6	101.6	89.8	1.2	1.7	0	0
17	21	2	0.7	0.6	2	27.5	102.6	101.2	1.3	1.9	0	0
18	21	2	3.9	1.4	5.8	44.9	99.7	94.2	1.3	1.3	0	0
19	21	2	0	2.3	5.6	31.6	86.8	88.5	0.9	0.3	0	0
20	21	2	0.7	2.4	5.7	44.1	102	92.8	2.6	2.8	0	0
21	21	2	0.5	0.8	3.8	32.1	89.5	93.9	1.8	2	0	0
22	21	2	0.9	3.3	4.7	33.5	99.1	99.8	1.7	3.1	0	0
23	21	2	0.7	1.1	8.1	32.5	100	112.9	2	2.4	0	0
24	21	2	2.5	3	3.5	32.1	111.9	96.5	1.7	1.5	0	0
25	21	2	0.5	-0.2	1.7	39.1	101.2	94.3	1.5	1.8	0	0
26	21	2	0.1	0.9	1.5	24.5	108.9	97.2	1	1.7	0	0
27	21	2	1.1	0.3	5.9	24.8	108.7	104	1.6	1.7	0	0
28	21	2	0	0	3.1	41.5	110.5	95.7	1.5	1.3	0	0
29	21	2	0.3	0.9	3.7	29.1	122.1	100.5	1.7	4.3	0	0
30	21	2	0	0.8	5.9	35.1	107.5	110	0.9	1.4	0	0
1	22	2	0	0	5.3	40.8	91.9	93.3	1.5	1.3	0	0
2	22	2	1.1	3.4	2.6	24	111.8	92.6	1.6	1.6	0	0
3	22	2	3.5	1.1	7.2	29.8	56.4	77.7	1.6	1.4	0	0
4	22	2	1.6	0.8	4.6	19.6	86.4	105.8	3.1	3.1	0	0
5	22	2	3.5	4.7	7.7	40.3	89	103.2	5.3	5.7	0	0
6	22	2	0.9	3.1	2	36.2	118.3	91.9	1.2	1.5	0	0
7	22	2	1.6	3.1	3	25.8	104.4	88	1.3	1.7	0	0
8	22	2	5	2.9	4.4	39.9	96.8	94.3	1.7	3	0	0
9	22	2	2.8	6	6.8	45.9	103	94	1.6	1.3	0	0
10	22	2	1.7	4.1	5.6	26	112.9	107	1.7	1.9	0	0
11	22	2	2.8	4.7	4.5	41.3	100.4	94.3	1.1	3	0	0
12	22	2	0	0.6	4.5	46.9	97.2	94.4	2	2.5	0	0
13	22	2	0.5	0.7	7.8	39.3	81.4	93	1.8	1.5	0	0
14	22	2	0	0	1.3	35.5	100	84.5	0	0.7	0	0
15	22	2	2.5	4.2	4.3	28.8	89.3	89.2	1.8	2.8	0	0
16	22	2	1	2.9	5.4	41.6	101.6	89.8	1.3	2.1	0	0
17	22	2	0.7	0.6	2	27.5	102.6	101.2	0.7	2	0	0
18	22	2	3.9	1.4	5.8	44.9	99.7	94.2	1.8	1.4	0	0
19	22	2	0	2.3	5.6	31.6	86.8	88.5	1	1.7	0	0
20	22	2	0.7	2.4	5.7	44.1	102	92.8	1.6	2.6	0	0
21	22	2	0.5	0.8	3.8	32.1	89.5	93.9	1.9	2.3	0	0
22	22	2	0.9	3.3	4.7	33.5	99.1	99.8	2.1	1.7	0	0
23	22	2	0.7	1.1	8.1	32.5	100	112.9	1.5	2.2	0	0
24	22	2	2.5	3	3.5	32.1	111.9	96.5	2.9	2.4	0	0
25	22	2	0.5	-0.2	1.7	39.1	101.2	94.3	1.4	5.8	0	0
26	22	2	0.1	0.9	1.5	24.5	108.9	97.2	1.5	1.1	0	0
27	22	2	1.1	0.3	5.9	24.8	108.7	104	1.8	1.9	0	0
28	22	2	0	0	3.1	41.5	110.5	95.7	1.5	1.5	0	0
29	22	2	0.3	0.9	3.7	29.1	122.1	100.5	1.7	6.5	0	0
30	22	2	0	0.8	5.9	35.1	107.5	110	1.1	2.3	0	0
1	23	2	0	0	5.3	40.8	91.9	93.3	1.4	1.5	0	0
2	23	2	1.1	3.4	2.6	24	111.8	92.6	1.1	2.5	0	0
3	23	2	3.5	1.1	7.2	29.8	56.4	77.7	1.8	2	0	0
4	23	2	1.6	0.8	4.6	19.6	86.4	105.8	1.6	2.6	0	0
5	23	2	3.5	4.7	7.7	40.3	89	103.2	3.9	4.4	0	0
6	23	2	0.9	3.1	2	36.2	118.3	91.9	1.3	1.5	0	0
7	23	2	1.6	3.1	3	25.8	104.4	88	1.7	3.7	0	0
8	23	2	5	2.9	4.4	39.9	96.8	94.3	1.5	2.9	0	0
9	23	2	2.8	6	6.8	45.9	103	94	3	3.1	0	0
10	23	2	1.7	4.1	5.6	26	112.9	107	1.7	1.9	0	0
11	23	2	2.8	4.7	4.5	41.3	100.4	94.3	3.1	3.2	0	0
12	23	2	0	0.6	4.5	46.9	97.2	94.4	1.9	1.6	0	0
13	23	2	0.5	0.7	7.8	39.3	81.4	93	1.8	1.7	0	0
14	23	2	0	0	1.3	35.5	100	84.5	0	1.7	0	0
15	23	2	2.5	4.2	4.3	28.8	89.3	89.2	1.3	2.4	0	0
16	23	2	1	2.9	5.4	41.6	101.6	89.8	2.4	3.2	0	0
17	23	2	0.7	0.6	2	27.5	102.6	101.2	1.7	2.4	0	0
18	23	2	3.9	1.4	5.8	44.9	99.7	94.2	1.8	2.7	0	0
19	23	2	0	2.3	5.6	31.6	86.8	88.5	1.3	0.7	0	0
20	23	2	0.7	2.4	5.7	44.1	102	92.8	1.2	3.4	0	0
21	23	2	0.5	0.8	3.8	32.1	89.5	93.9	3.1	3.4	0	0
22	23	2	0.9	3.3	4.7	33.5	99.1	99.8	1.8	3.6	0	0
23	23	2	0.7	1.1	8.1	32.5	100	112.9	1.6	1.3	0	0
24	23	2	2.5	3	3.5	32.1	111.9	96.5	0.9	1.1	0	0
25	23	2	0.5	-0.2	1.7	39.1	101.2	94.3	0	2.1	0	0
26	23	2	0.1	0.9	1.5	24.5	108.9	97.2	2	1.5	0	0
27	23	2	1.1	0.3	5.9	24.8	108.7	104	1.7	2.6	0	0
28	23	2	0	0	3.1	41.5	110.5	95.7	3.4	3.5	0	0
29	23	2	0.3	0.9	3.7	29.1	122.1	100.5	2.2	7.4	0	0
30	23	2	0	0.8	5.9	35.1	107.5	110	1.3	1.5	0	0
1	31	2	0	0	5.3	40.8	91.9	93.3	2.2	9	0	0
2	31	2	1.1	3.4	2.6	24	111.8	92.6	1.1	1.4	0	0
3	31	2	3.5	1.1	7.2	29.8	56.4	77.7	3.8	2.8	0	0
4	31	2	1.6	0.8	4.6	19.6	86.4	105.8	3.3	4.1	0	0
5	31	2	3.5	4.7	7.7	40.3	89	103.2	6.7	2.9	0	0
6	31	2	0.9	3.1	2	36.2	118.3	91.9	1.8	2.6	0	0
7	31	2	1.6	3.1	3	25.8	104.4	88	1.8	2.1	0	0
8	31	2	5	2.9	4.4	39.9	96.8	94.3	2.6	2.3	0	0
9	31	2	2.8	6	6.8	45.9	103	94	2.9	3.1	0	0
10	31	2	1.7	4.1	5.6	26	112.9	107	2.2	1.5	0	0
11	31	2	2.8	4.7	4.5	41.3	100.4	94.3	1.2	1.9	0	0
12	31	2	0	0.6	4.5	46.9	97.2	94.4	2.2	2.6	0	0
13	31	2	0.5	0.7	7.8	39.3	81.4	93	2.2	2.4	0	0
14	31	2	0	0	1.3	35.5	100	84.5	1.3	2.1	0	0
15	31	2	2.5	4.2	4.3	28.8	89.3	89.2	3	2.1	0	0
16	31	2	1	2.9	5.4	41.6	101.6	89.8	2.2	1.6	0	0
17	31	2	0.7	0.6	2	27.5	102.6	101.2	2.9	2.7	0	0
18	31	2	3.9	1.4	5.8	44.9	99.7	94.2	2.4	2.5	0	0
19	31	2	0	2.3	5.6	31.6	86.8	88.5	1.3	2.1	0	0
20	31	2	0.7	2.4	5.7	44.1	102	92.8	2.3	3.1	0	0
21	31	2	0.5	0.8	3.8	32.1	89.5	93.9	1.6	1.8	0	0
22	31	2	0.9	3.3	4.7	33.5	99.1	99.8	2.6	3.3	0	0
23	31	2	0.7	1.1	8.1	32.5	100	112.9	2.6	2.8	0	0
24	31	2	2.5	3	3.5	32.1	111.9	96.5	2.3	2	0	0
25	31	2	0.5	-0.2	1.7	39.1	101.2	94.3	1	1.6	0	0
26	31	2	0.1	0.9	1.5	24.5	108.9	97.2	2.2	2.1	0	0
27	31	2	1.1	0.3	5.9	24.8	108.7	104	3	2.1	0	0
28	31	2	0	0	3.1	41.5	110.5	95.7	2.2	1.7	0	0
29	31	2	0.3	0.9	3.7	29.1	122.1	100.5	2	5.5	0	0
30	31	2	0	0.8	5.9	35.1	107.5	110	1.5	0.9	0	0
1	32	2	0	0	5.3	40.8	91.9	93.3	2	1.6	0	0
2	32	2	1.1	3.4	2.6	24	111.8	92.6	1.4	1.6	0	0
3	32	2	3.5	1.1	7.2	29.8	56.4	77.7	1.6	1.7	0	0
4	32	2	1.6	0.8	4.6	19.6	86.4	105.8	2.9	3.8	0	0
5	32	2	3.5	4.7	7.7	40.3	89	103.2	7.2	2.8	0	0
6	32	2	0.9	3.1	2	36.2	118.3	91.9	3.2	1.5	0	0
7	32	2	1.6	3.1	3	25.8	104.4	88	2	2.6	0	0
8	32	2	5	2.9	4.4	39.9	96.8	94.3	1.2	1.5	0	0
9	32	2	2.8	6	6.8	45.9	103	94	3.3	3	0	0
10	32	2	1.7	4.1	5.6	26	112.9	107	2.8	1.4	0	0
11	32	2	2.8	4.7	4.5	41.3	100.4	94.3	1.5	1.9	0	0
12	32	2	0	0.6	4.5	46.9	97.2	94.4	1.4	1.8	0	0
13	32	2	0.5	0.7	7.8	39.3	81.4	93	2.6	2.2	0	0
14	32	2	0	0	1.3	35.5	100	84.5	1.8	2.5	0	0
15	32	2	2.5	4.2	4.3	28.8	89.3	89.2	2.3	2.1	0	0
16	32	2	1	2.9	5.4	41.6	101.6	89.8	2	2.2	0	0
17	32	2	0.7	0.6	2	27.5	102.6	101.2	1.7	1.8	0	0
18	32	2	3.9	1.4	5.8	44.9	99.7	94.2	3.2	2.5	0	0
19	32	2	0	2.3	5.6	31.6	86.8	88.5	1.5	1.8	0	0
20	32	2	0.7	2.4	5.7	44.1	102	92.8	4	3.3	0	0
21	32	2	0.5	0.8	3.8	32.1	89.5	93.9	0.8	1.5	0	0
22	32	2	0.9	3.3	4.7	33.5	99.1	99.8	2.8	2.8	0	0
23	32	2	0.7	1.1	8.1	32.5	100	112.9	1.7	2.7	0	0
24	32	2	2.5	3	3.5	32.1	111.9	96.5	1.8	1.6	0	0
25	32	2	0.5	-0.2	1.7	39.1	101.2	94.3	1.7	1.5	0	0
26	32	2	0.1	0.9	1.5	24.5	108.9	97.2	2	1.1	0	0
27	32	2	1.1	0.3	5.9	24.8	108.7	104	3.4	1.6	0	0
28	32	2	0	0	3.1	41.5	110.5	95.7	2.4	2.3	0	0
29	32	2	0.3	0.9	3.7	29.1	122.1	100.5	1.9	6.3	0	0
30	32	2	0	0.8	5.9	35.1	107.5	110	1.3	1.7	0	0
1	33	2	0	0	5.3	40.8	91.9	93.3	1.8	2.1	0	0
2	33	2	1.1	3.4	2.6	24	111.8	92.6	2	2.5	0	0
3	33	2	3.5	1.1	7.2	29.8	56.4	77.7	1.8	1.7	0	0
4	33	2	1.6	0.8	4.6	19.6	86.4	105.8	2.7	3.3	0	0
5	33	2	3.5	4.7	7.7	40.3	89	103.2	1.8	1.7	0	0
6	33	2	0.9	3.1	2	36.2	118.3	91.9	2.7	1.9	0	0
7	33	2	1.6	3.1	3	25.8	104.4	88	2.3	2.1	0	0
8	33	2	5	2.9	4.4	39.9	96.8	94.3	1.6	2.9	0	0
9	33	2	2.8	6	6.8	45.9	103	94	2.6	2.7	0	0
10	33	2	1.7	4.1	5.6	26	112.9	107	3.2	2.5	0	0
11	33	2	2.8	4.7	4.5	41.3	100.4	94.3	2.1	2.4	0	0
12	33	2	0	0.6	4.5	46.9	97.2	94.4	2.1	2.3	0	0
13	33	2	0.5	0.7	7.8	39.3	81.4	93	2	2.6	0	0
14	33	2	0	0	1.3	35.5	100	84.5	0.9	1.2	0	0
15	33	2	2.5	4.2	4.3	28.8	89.3	89.2	1.7	2.3	0	0
16	33	2	1	2.9	5.4	41.6	101.6	89.8	1.7	1.8	0	0
17	33	2	0.7	0.6	2	27.5	102.6	101.2	2.2	2.5	0	0
18	33	2	3.9	1.4	5.8	44.9	99.7	94.2	1.5	2.7	0	0
19	33	2	0	2.3	5.6	31.6	86.8	88.5	1.7	2	0	0
20	33	2	0.7	2.4	5.7	44.1	102	92.8	3.4	2.2	0	0
21	33	2	0.5	0.8	3.8	32.1	89.5	93.9	1	1.5	0	0
22	33	2	0.9	3.3	4.7	33.5	99.1	99.8	2.3	3.1	0	0
23	33	2	0.7	1.1	8.1	32.5	100	112.9	2.5	2.6	0	0
24	33	2	2.5	3	3.5	32.1	111.9	96.5	2.2	2.6	0	0
25	33	2	0.5	-0.2	1.7	39.1	101.2	94.3	1.6	1.9	0	0
26	33	2	0.1	0.9	1.5	24.5	108.9	97.2	1.6	2.3	0	0
27	33	2	1.1	0.3	5.9	24.8	108.7	104	1.6	3.1	0	0
28	33	2	0	0	3.1	41.5	110.5	95.7	1.8	1.8	0	0
29	33	2	0.3	0.9	3.7	29.1	122.1	100.5	2.6	4	0	0
30	33	2	0	0.8	5.9	35.1	107.5	110	1.9	1	0	0
1	41	2	0	0	5.3	40.8	91.9	93.3	1.5	1.7	0	0
2	41	2	1.1	3.4	2.6	24	111.8	92.6	2	2.2	0	0
3	41	2	3.5	1.1	7.2	29.8	56.4	77.7	3.1	3.4	0	0
4	41	2	1.6	0.8	4.6	19.6	86.4	105.8	3.6	3.7	0	0
5	41	2	3.5	4.7	7.7	40.3	89	103.2	2	3.3	0	0
6	41	2	0.9	3.1	2	36.2	118.3	91.9	2.3	2.4	0	0
7	41	2	1.6	3.1	3	25.8	104.4	88	1.5	2.5	0	0
8	41	2	5	2.9	4.4	39.9	96.8	94.3	3	7.9	0	0
9	41	2	2.8	6	6.8	45.9	103	94	1.9	3.9	0	0
10	41	2	1.7	4.1	5.6	26	112.9	107	2.2	1.9	0	0
11	41	2	2.8	4.7	4.5	41.3	100.4	94.3	1.4	1.4	0	0
12	41	2	0	0.6	4.5	46.9	97.2	94.4	1.9	2.5	0	0
13	41	2	0.5	0.7	7.8	39.3	81.4	93	1.9	2.5	0	0
14	41	2	0	0	1.3	35.5	100	84.5	1.1	1.3	0	0
15	41	2	2.5	4.2	4.3	28.8	89.3	89.2	4.5	2.1	0	0
16	41	2	1	2.9	5.4	41.6	101.6	89.8	2	2.5	0	0
17	41	2	0.7	0.6	2	27.5	102.6	101.2	2.6	2.7	0	0
18	41	2	3.9	1.4	5.8	44.9	99.7	94.2	2.9	1.9	0	0
19	41	2	0	2.3	5.6	31.6	86.8	88.5	2	1.8	0	0
20	41	2	0.7	2.4	5.7	44.1	102	92.8	4.5	2.5	0	0
21	41	2	0.5	0.8	3.8	32.1	89.5	93.9	1.4	2.3	0	0
22	41	2	0.9	3.3	4.7	33.5	99.1	99.8	2.7	2.7	0	0
23	41	2	0.7	1.1	8.1	32.5	100	112.9	2.5	2.4	0	0
24	41	2	2.5	3	3.5	32.1	111.9	96.5	2.7	2.2	0	0
25	41	2	0.5	-0.2	1.7	39.1	101.2	94.3	0.8	1.4	0	0
26	41	2	0.1	0.9	1.5	24.5	108.9	97.2	1.7	2.4	0	0
27	41	2	1.1	0.3	5.9	24.8	108.7	104	2.9	1.8	0	0
28	41	2	0	0	3.1	41.5	110.5	95.7	2.1	1.7	0	0
29	41	2	0.3	0.9	3.7	29.1	122.1	100.5	2.5	7.3	0	0
30	41	2	0	0.8	5.9	35.1	107.5	110	2.1	1.6	0	0
1	42	2	0	0	5.3	40.8	91.9	93.3	1.8	1.9	4.7	0
2	42	2	1.1	3.4	2.6	24	111.8	92.6	2.3	1.5	0	0
3	42	2	3.5	1.1	7.2	29.8	56.4	77.7	2.4	1.5	0	0
4	42	2	1.6	0.8	4.6	19.6	86.4	105.8	3.6	3.7	0	0
5	42	2	3.5	4.7	7.7	40.3	89	103.2	4.7	4	0	0
6	42	2	0.9	3.1	2	36.2	118.3	91.9	2.4	2.3	0	0
7	42	2	1.6	3.1	3	25.8	104.4	88	2.4	2.5	0	0
8	42	2	5	2.9	4.4	39.9	96.8	94.3	1.6	2.5	0	0
9	42	2	2.8	6	6.8	45.9	103	94	3.7	11.6	0	0
10	42	2	1.7	4.1	5.6	26	112.9	107	2.8	1.9	0	0
11	42	2	2.8	4.7	4.5	41.3	100.4	94.3	1.9	1.7	0	0
12	42	2	0	0.6	4.5	46.9	97.2	94.4	2	3.2	0	0
13	42	2	0.5	0.7	7.8	39.3	81.4	93	3.1	2	0	0
14	42	2	0	0	1.3	35.5	100	84.5	2	1.7	0	0
15	42	2	2.5	4.2	4.3	28.8	89.3	89.2	2.1	1.2	0	0
16	42	2	1	2.9	5.4	41.6	101.6	89.8	1.8	1.5	0	0
17	42	2	0.7	0.6	2	27.5	102.6	101.2	2.2	1	0	0
18	42	2	3.9	1.4	5.8	44.9	99.7	94.2	2.2	2	0	0
19	42	2	0	2.3	5.6	31.6	86.8	88.5	1.7	2.3	0	0
20	42	2	0.7	2.4	5.7	44.1	102	92.8	2.5	2.5	0	0
21	42	2	0.5	0.8	3.8	32.1	89.5	93.9	0.6	1.9	0	0
22	42	2	0.9	3.3	4.7	33.5	99.1	99.8	3.6	1.8	0	0
23	42	2	0.7	1.1	8.1	32.5	100	112.9	1.9	2.2	0	0
24	42	2	2.5	3	3.5	32.1	111.9	96.5	2.4	1.1	0	0
25	42	2	0.5	-0.2	1.7	39.1	101.2	94.3	1.3	1.5	0	0
26	42	2	0.1	0.9	1.5	24.5	108.9	97.2	1.9	2.1	0	0
27	42	2	1.1	0.3	5.9	24.8	108.7	104	2.8	1.9	0	0
28	42	2	0	0	3.1	41.5	110.5	95.7	1	1.3	0	0
29	42	2	0.3	0.9	3.7	29.1	122.1	100.5	2.1	2.1	0	0
30	42	2	0	0.8	5.9	35.1	107.5	110	1.6	2.8	0	0
1	43	2	0	0	5.3	40.8	91.9	93.3	1.8	1.8	0	0
2	43	2	1.1	3.4	2.6	24	111.8	92.6	1.6	1.8	0	0
3	43	2	3.5	1.1	7.2	29.8	56.4	77.7	2	2.1	0	0
4	43	2	1.6	0.8	4.6	19.6	86.4	105.8	2.5	3.4	0	0
5	43	2	3.5	4.7	7.7	40.3	89	103.2	1.9	1.4	0	0
6	43	2	0.9	3.1	2	36.2	118.3	91.9	2.6	2	0	0
7	43	2	1.6	3.1	3	25.8	104.4	88	1.7	2.9	0	0
8	43	2	5	2.9	4.4	39.9	96.8	94.3	2.2	2.5	0	0
9	43	2	2.8	6	6.8	45.9	103	94	1.7	9.6	0	0
10	43	2	1.7	4.1	5.6	26	112.9	107	2.8	1.9	0	0
11	43	2	2.8	4.7	4.5	41.3	100.4	94.3	1.5	1.7	0	0
12	43	2	0	0.6	4.5	46.9	97.2	94.4	3.1	3.2	0	0
13	43	2	0.5	0.7	7.8	39.3	81.4	93	2.4	2.8	0	0
14	43	2	0	0	1.3	35.5	100	84.5	0.9	1.3	0	0
15	43	2	2.5	4.2	4.3	28.8	89.3	89.2	3.4	1.7	0	0
16	43	2	1	2.9	5.4	41.6	101.6	89.8	2.1	2	0	0
17	43	2	0.7	0.6	2	27.5	102.6	101.2	2.5	2.3	0	0
18	43	2	3.9	1.4	5.8	44.9	99.7	94.2	1.7	3.8	0	0
19	43	2	0	2.3	5.6	31.6	86.8	88.5	1.2	1.5	0	0
20	43	2	0.7	2.4	5.7	44.1	102	92.8	1.9	2.9	0	0
21	43	2	0.5	0.8	3.8	32.1	89.5	93.9	1.2	1.7	0	0
22	43	2	0.9	3.3	4.7	33.5	99.1	99.8	2.6	2.6	0	0
23	43	2	0.7	1.1	8.1	32.5	100	112.9	1.7	2.5	0	0
24	43	2	2.5	3	3.5	32.1	111.9	96.5	2.1	2.5	0	0
25	43	2	0.5	-0.2	1.7	39.1	101.2	94.3	0.3	1.7	0	0
26	43	2	0.1	0.9	1.5	24.5	108.9	97.2	1.7	1.6	0	0
27	43	2	1.1	0.3	5.9	24.8	108.7	104	3.5	2.1	0	0
28	43	2	0	0	3.1	41.5	110.5	95.7	1.9	2.1	0	0
29	43	2	0.3	0.9	3.7	29.1	122.1	100.5	2.3	4.6	0	0
30	43	2	0	0.8	5.9	35.1	107.5	110	1.8	2.7	0	0
